# Supplementary material
Source: publisher figshare collection journal article supplement (https://sage.figshare.com/ndownloader/files/13992584)
Supplement: Supplementary file 1 [file 13992584]

Archive with 4 entries (4 files):
- Appendix A final.pdf
- Appendix B list of cases & codebooks.pdf
- Data for the empirical comparison section.xls
- PEIG Dataset 1.0.xls
