# Supplementary material
Source: publisher figshare collection journal article supplement (https://sage.figshare.com/ndownloader/files/13992584)
Supplement: Supplementary file 1 [file 13992584 › Appendix B list of cases & codebooks.pdf]

## Appendix B (For Online Publication Only)

### Table of Contents

|                                                                                           |    |
|-------------------------------------------------------------------------------------------|----|
| 1. PEIG 1.0- List of Cases of U.S. And USSR/Russian Partisan Electoral Intervention ..... | 2  |
| 2. Select sources for electoral intervention cases.....                                   | 7  |
| 3. Codebook PEIG 1.0 Dataset.....                                                         | 31 |
| 4. Codebook prt. 2 dataset for the empirical comparison.....                              | 35 |
| 5. Replication code for the empirical comparison section.....                             | 37 |

# 1. PEIG 1.0- List of Cases of U.S. And USSR/Russian Partisan Electoral Intervention

| Target              | Intervener | Year/Election | Assisted Party/Candidate <sup>b</sup> | Covert/overt       |
|---------------------|------------|---------------|---------------------------------------|--------------------|
| Argentina           | U.S.       | 1946          | Jose P. Tamborini                     | Overt              |
| Hungary             | USSR       | 1947          | MKP                                   | Overt              |
| Italy <sup>a</sup>  | U.S.       | 1948          | DC                                    | Overt <sup>c</sup> |
| Italy <sup>a</sup>  | USSR       | 1948          | PCI                                   | Covert             |
| U.S.                | USSR       | 1948          | Henry A. Wallace                      | Overt              |
| Israel              | U.S.       | 1949          | Mapai                                 | Overt              |
| Finland             | USSR       | 1950          | *                                     | Overt              |
| Japan               | U.S.       | 1952          | Liberal Party                         | Overt              |
| West Germany        | U.S.       | 1953          | CDU                                   | Overt              |
| Italy <sup>a</sup>  | U.S.       | 1953          | DC                                    | Overt <sup>c</sup> |
| Italy <sup>a</sup>  | USSR       | 1953          | PCI                                   | Covert             |
| Japan               | U.S.       | 1953          | Liberal Party                         | Overt <sup>c</sup> |
| Philippines         | U.S.       | 1953          | Ramon Magsaysay                       | Covert             |
| Brazil              | U.S.       | 1955          | Juarez Tavora                         | Covert             |
| Indonesia           | U.S.       | 1955          | Masjumi                               | Covert             |
| Laos                | U.S.       | 1955          | NPP                                   | Covert             |
| Finland             | USSR       | 1956          | Urho Kaleva<br>Kekkonen               | Overt              |
| Iceland             | U.S.       | 1956          | Independence Party                    | Overt              |
| Sri Lanka           | U.S.       | 1956          | UNP                                   | Overt              |
| West Germany        | USSR       | 1957          | SPD                                   | Overt              |
| Lebanon             | U.S.       | 1957          | Supporters of<br>Camille Chamoun      | Covert             |
| Philippines         | U.S.       | 1957          | Jose Yulo                             | Covert             |
| Greece <sup>a</sup> | U.S.       | 1958          | ERE                                   | Covert             |
| Greece <sup>a</sup> | USSR       | 1958          | EDA                                   | Overt              |
| Guatemala           | U.S.       | 1958          | Jose Luis Cruz<br>Salazar             | Covert             |
| Italy               | U.S.       | 1958          | DC                                    | Covert             |
| Japan               | U.S.       | 1958          | LDP                                   | Overt <sup>c</sup> |
| Laos                | U.S.       | 1958          | NPP                                   | Overt <sup>c</sup> |

|                                  |      |              |                              |        |
|----------------------------------|------|--------------|------------------------------|--------|
| Venezuela                        | USSR | 1958         | Wolfgang Larazabal           | Covert |
| Malaysia                         | U.S. | 1959         | UNMO                         | Covert |
| Nepal                            | U.S. | 1959         | Nepali Congress Party        | Covert |
| San Marino                       | U.S. | 1959         | PDCS                         | Covert |
| Democratic Republic of the Congo | USSR | 1960         | MNC                          | Covert |
| Japan                            | U.S. | 1960         | LDP                          | Covert |
| Laos                             | U.S. | 1960         | CDNI                         | Covert |
| Sri Lanka                        | U.S. | 1960 (March) | UNP                          | Covert |
| Sri Lanka                        | U.S. | 1960 (July)  | UNP                          | Covert |
| Greece                           | U.S. | 1961         | ERE                          | Covert |
| Philippines                      | U.S. | 1961         | Diosdado Pangan Macapagal    | Covert |
| South Vietnam†                   | U.S. | 1961         | Ngo Dinh Diem                | Covert |
| Brazil                           | U.S. | 1962         | **                           | Covert |
| Canada                           | USSR | 1962         | Liberal Party                | Overt  |
| Finland                          | USSR | 1962         | Urho Kaleva Kekkonen         | Overt  |
| Peru                             | U.S. | 1962         | Victor Raul Haya De La Torre | Covert |
| Italy                            | U.S. | 1963         | DC                           | Covert |
| Japan                            | U.S. | 1963         | LDP                          | Covert |
| Bolivia†                         | U.S. | 1964         | Victor Paz Estenssoro        | Covert |
| Chile <sup>a</sup>               | U.S. | 1964         | Eduardo Frei Montalva        | Covert |
| Chile <sup>a</sup>               | USSR | 1964         | Salvador Allende Gossens     | Covert |
| Somalia                          | U.S. | 1964         | ***                          | Covert |
| Sri Lanka                        | U.S. | 1965         | UNP                          | Covert |
| Bolivia                          | U.S. | 1966         | Rene Barrientos              | Covert |

|                    |      |      |                                    |                    |
|--------------------|------|------|------------------------------------|--------------------|
|                    |      |      | Ortuno                             |                    |
| Costa Rica         | U.S. | 1966 | Daniel Oduber Quiros               | Covert             |
| Dominican Republic | U.S. | 1966 | Joaquin Beleaguer                  | Covert             |
| India              | USSR | 1967 | CPI                                | Covert             |
| Laos               | U.S. | 1967 | ****                               | Covert             |
| Finland            | USSR | 1968 | Urho Kaleva Kekkonen               | Overt              |
| Guyana             | U.S. | 1968 | PNC                                | Covert             |
| Italy              | U.S. | 1968 | DC                                 | Covert             |
| West Germany       | USSR | 1969 | SPD                                | Overt              |
| Thailand           | U.S. | 1969 | UTPT                               | Covert             |
| Chile <sup>a</sup> | U.S. | 1970 | Radomiro Tomic & Jorge Allesanderi | Covert             |
| Chile <sup>a</sup> | USSR | 1970 | Salvador Allende Gossens           | Covert             |
| Costa Rica         | USSR | 1970 | Jose Figueres Ferrer               | Covert             |
| Pakistan           | USSR | 1970 | Awami League                       | Covert             |
| Malta              | U.S. | 1971 | PN                                 | Covert             |
| Uruguay            | U.S. | 1971 | Colorados/Juan Maria Bordaberry    | Covert             |
| South Vietnam †    | U.S. | 1971 | Nguyen Van Thieu                   | Covert             |
| West Germany       | USSR | 1972 | SPD                                | Covert             |
| Italy <sup>a</sup> | U.S. | 1972 | DC                                 | Covert             |
| Italy <sup>a</sup> | USSR | 1972 | PCI                                | Covert             |
| Japan              | USSR | 1972 | JCP                                | Covert             |
| Bangladesh         | USSR | 1973 | Awami League                       | Covert             |
| Denmark            | USSR | 1973 | DKP                                | Covert             |
| France             | USSR | 1974 | Francois Mitterrand                | Covert             |
| Greece             | USSR | 1974 | United Left                        | Covert             |
| Denmark            | USSR | 1975 | DKP                                | Covert             |
| Italy <sup>a</sup> | U.S. | 1976 | DC                                 | Overt <sup>c</sup> |

|                    |        |             |                                   |                     |
|--------------------|--------|-------------|-----------------------------------|---------------------|
| Italy <sup>a</sup> | USSR   | 1976        | PCI                               | Covert              |
| India              | USSR   | 1977        | Congress party (I)                | Covert              |
| West Germany       | USSR   | 1980        | SPD                               | Covert              |
| Iran               | U.S.   | 1980 (Jan.) | Ahmad Madani                      | Covert              |
| Jamaica            | U.S.   | 1980        | Jamaican Labor Party              | Covert              |
| El Salvador        | U.S.   | 1982        | Christian Democratic Party/Duarte | Overt               |
| Mauritius          | U.S.   | 1982        | Labor Party                       | Covert              |
| West Germany       | USSR   | 1983        | SPD                               | Overt               |
| Italy              | U.S.   | 1983        | DC                                | Covert              |
| El Salvador        | U.S.   | 1984        | Jose Napoleon Duarte              | Covert <sup>c</sup> |
| Grenada            | U.S.   | 1984        | New National Party                | Overt <sup>c</sup>  |
| Panama             | U.S.   | 1984        | Nicolas Ardito Barletta           | Covert              |
| U.S.               | USSR   | 1984        | Walter F. Mondale                 | Covert              |
| Costa Rica         | U.S.   | 1986        | Rafael Angel Calderon Fournier    | Covert              |
| U.K                | U.S.   | 1987        | Conservatives                     | Overt               |
| Chile†             | U.S.   | 1988        | ‘No’ Campaign                     | Overt               |
| France             | USSR   | 1988        | Andre Lajoinie                    | Covert              |
| Panama             | U.S.   | 1989        | Guillermo Endara                  | Covert              |
| Bulgaria           | U.S.   | 1990        | UDF                               | Overt               |
| Czechoslovakia     | U.S.   | 1990        | OF-VPN                            | Overt               |
| Haiti              | U.S.   | 1990        | Marc Louis Bazin                  | Covert              |
| Nicaragua          | U.S.   | 1990        | Violeta Barrios de Chamorro       | Overt <sup>c</sup>  |
| Romania            | U.S.   | 1990        | PNL                               | Overt               |
| Albania            | U.S.   | 1991        | PDSH                              | Overt               |
| Bulgaria           | U.S.   | 1991        | UDF                               | Covert              |
| Albania            | U.S.   | 1992        | PDSH                              | Covert              |
| Israel             | U.S.   | 1992        | Labor                             | Overt               |
| Lithuania          | Russia | 1992        | LDDP                              | Overt               |

|                   |        |      |                          |                    |
|-------------------|--------|------|--------------------------|--------------------|
| Romania           | U.S.   | 1992 | CDR                      | Covert             |
| Yugoslavia/Serbia | U.S.   | 1992 | Milan Panic              | Overt              |
| Cambodia          | U.S.   | 1993 | FUNCINPEC                | Covert             |
| Belarus           | Russia | 1994 | Vyacheslav F. Kebich     | Overt              |
| Ukraine           | U.S.   | 1994 | Leonid Kravchuk          | Overt              |
| Israel            | U.S.   | 1996 | Shimon Peres/<br>Labor   | Overt              |
| Russia            | U.S.   | 1996 | Boris N. Yeltsin         | Overt <sup>c</sup> |
| Latvia            | Russia | 1998 | TSP                      | Overt              |
| Slovakia          | U.S.   | 1998 | SDK                      | Covert             |
| Israel            | U.S.   | 1999 | Ehud Barak/One<br>Israel | Covert             |
| Yugoslavia/Serbia | U.S.   | 2000 | Vojislav Kostunica       | Overt              |

#### Notes:

<sup>a</sup> Double interventions (the U.S. backing one side while the USSR/Russia backing another side during the same election).

<sup>b</sup> Name of candidate in presidential elections, name of party in parliamentary elections. Main candidate/ party only.

<sup>c</sup> An overt intervention that also included significant covert component.

† Cases of partisan electoral interventions in elections which weren't competitive following my criteria, usually due to last moment boycotts of the elections by one of the major sides which were widely expected to contest them or (in the 1988 Chilean case) a rare example of a relatively competitive plebiscite.

\* Identity of aided candidate in this election not fully certain, besides being a competitor to Pres. Paasikivi, given available data (although probably Urho Kekkonen).

\*\* Identity of aided candidate/party in this election, besides being part of the opposition to Pres. Goulart, unknown given available data.

\*\*\* Identity of aided candidate/party, besides being among the losers of this election, unknown given available data.

\*\*\*\* Identity of aided candidate/party unknown given available data.

## 2. Select Sources for Electoral Intervention Cases

Enclosed is a list of some of the main sources (usually the 2-3 most important sources) used to identify and code each of the partisan electoral intervention included in PEIG.<sup>1</sup>

Abbreviations:

NARA: U.S. National Archives at College Park, Maryland

FRUS: Foreign Relations of the United States (volumes of American archival documents published by the Office of the Historian in the U.S. State Department).<sup>2</sup>

ADST: the Association for Diplomatic Studies and Training Foreign Affairs Oral History program.

DDRS: The Declassified Documents Reference System at Gale Group website.

### ***Argentina 1946***

Roger Trask 1984. "Spurille Braden versus George Messersmith: World War II, the Cold War and Argentine Policy, 1945-1947" *Journal of Interamerican Studies and World Affairs* 26(1): 69-95, (see pgs.77-78)

FRUS 1946 vol. 9: pgs. 184, 189-190, 201-202,

Sumner Welles 1946. "Argentine Elections: Interventionist Propaganda" *Washington Post* February 27

### ***Hungary 1947***

Laszlo Borhi 2004. *Hungary in the Cold War 1945-1956: Between the United States and the Soviet Union*. Budapest: CEU Press, pgs. 116-118

Martin Mevius 2005. *Agents of Moscow: The Hungarian Communist party and the Origins of Socialist patriotism 1941-1953*. Oxford: Clarendon press, pgs. 49-50, 182-183, 186-189

---

<sup>1</sup> I thank Lev Uchitel for his assistance with some Russian language sources and Renata Redford for her assistance with the Italian language source noted here (Riva 1999).

<sup>2</sup> Some of the older FRUS volumes do not include document numbers. Accordingly for those volumes page numbers are used instead of document numbers.

### ***Italy 1948 (U.S.)***

James Miller.1983. "Taking off the Gloves: The United States and the Italian Elections of 1948." *Diplomatic History* 7(1):35-56 (see esp. pgs. 41-52)

Interview of the National Security Archive with F. Mark Wyatt (former CIA agent) 2.15.1996 available at nsarchive.gwu.edu

FRUS 1948 vol. 3: 775-779, 724-726

### ***Italy 1948 (USSR)***

Elena Agarossi and Victor Zaslavsky 2007. *Stalin and Togliatti: Italy and the Origins of the Cold War*. Stanford: Stanford University Press, pgs. 283-284

Valerio Riva 1999. *Oro Da Mosca*. Milan: Mondadori, pgs. 160-162,188-189

### ***United States 1948***

Zubok Vladislav 2009. *A Failed Empire: The Soviet Union in the Cold War from Stalin to Gorbachev*. Chapel Hill: University of North Carolina Press, pg. 76

"In the Interests of Peace" *Time*, May 31, 1948

"Open and Honest?" *Guardian*, May 19, 1948

### ***Israel 1949***

FRUS 1949 vol. 6: pgs. 614-615, 645-647

John Scali 1949. "Recognition Due to Follow Loan to Israel" *Washington Post*, January 21

### ***Finland 1950***

Roy Allison 1985. *Finland's Relations with the Soviet Union*. Houndsmill: Macmillan, pg. 134

Mikko Majander 2004. "Cold War Historiography in Finland" In Thorsten Olesen (ed). 2004. *The Cold War and the Nordic Countries*. Odense: University Press of Southern Denmark, pg. 49

### ***Japan 1952***

FRUS 1952-1954 vol. 14(2): Document 573

FRUS 1952-1954 vol. 14(2): Document 596

FRUS 1952-1954 vol. 14(2): Document 598

### ***West Germany 1953***

Marc Trachtenberg 1999. *A Constructed Peace: The Making of a European Settlement 1945-1963*. Princeton: Princeton University Press, pgs. 133-134

Conversation August 1, 1953 WH in Telephone conversations May-December 53 Box 10, Dulles papers, telephone call series, Eisenhower Presidential Library (DDEL)

FRUS 1952-1954 vol. 7(1): pgs. 442-444

### ***Italy 1953 (U.S.)***

FRUS 1952-54 vol. 6(2): Document 737

*The Pike Report*. Nottingham: Spokesman Books 1977, pg. 204

Mario Del Pero 2001. "The United States and Psychological warfare in Italy 1948-1955" *The Journal of American History* 87(4): 1304-1334 (see pgs.1319-1321)

### ***Italy 1953 (USSR)***

Valerio Riva 1999. *Oro Da Mosca*. Milan: Mondadori, pg. 262

### ***Japan 1953***

FRUS 1952-1954 vol. 14(2): Document 643

FRUS 1952-1954 vol. 14(2): Document 645

Tim Weiner 2007. *Legacy of Ashes: The History of the CIA*. New York: Doubleday, pgs. 117, 568-569

### ***Philippines 1953***

Douglas Macdonald 1992. *Adventures in Chaos: American Intervention for Reform in the Third World*. Cambridge: Harvard University Press, pgs. 175-177

Shalom, Stephen. 1981. *The United States and the Philippines*. Philadelphia: ISHI, pgs. 90-92

Smith, Joseph. 1976. *Portrait of a Cold Warrior*. New York: Putnam, pgs. 106-114

### ***Brazil 1955***

FRUS 1955-1957 vol. 7: Document 305

FRUS 1955-1957 vol. 6: Document 2

Michael Weis 1993. *Cold Warriors and Coups D'Etat: Brazilian American Relations 1945-1964*. Albuquerque: University of New Mexico, pgs. 85-86

### ***Indonesia 1955***

FRUS 1955-1957 vol. 21: Document 171

FRUS 1955-1957 vol. 22: Document 95

Joseph Smith. 1976. *Portrait of a Cold Warrior*. New York: Putnam, pgs. 210-215

### ***Laos 1955***

FRUS 1955-1957 vol. 21: Document 299

FRUS 1955-1957 vol. 21: Document 301

William Leary 1999. "CIA Air operations in Laos 1955-1974." *Studies in Intelligence* vol. 43 (The CIA Center for the Study of Intelligence- Unclassified)

### ***Iceland 1956***

Valur Ingimundarson 1999. "Buttressing the West in the North: The Atlantic Alliance, Economic Warfare and the Soviet Challenge in Iceland, 1956-1959" *The International History Review* 21(1): 80-103 (see pgs. 90-91)

Donald Nuechterlein 1961. *Iceland: Reluctant Ally*. Ithaca: Cornell University Press, pgs. 57-60

### ***Finland 1956***

Max Jakobson 1998. *Finland in the New Europe*. Connecticut: Praeger, pgs. 65-67

Kimmo Rentola 2000. "From Half-Adversary to Half-Ally: Finland in Soviet Policy, 1953-58" *Cold War History*, 1(1): 75-102, (see pgs. 83-88)

### ***Sri Lanka 1956***

FRUS 1955-1957 vol. 8: Document 132

FRUS 1955-1957 vol. 8: Document 136

A.M. Rosenthal 1956. "Ceylon Hears U.S. May Cut Off Aid" *New York Times*, April 12

### ***West Germany 1957***

U.W. Kitzinger 1960. *German Electoral Politics: A Study of the 1957 Campaign*. Oxford: Clarendon, pgs. 251-254

"Dear Berliners" *New York Times*, August 18, 1957

Gaston Coblentz 1957. "West Warned By Khrushchev" *Washington Post*, August 9

### ***Lebanon 1957***

FRUS 1955-1957 vol. 13: Document 136

FRUS 1955-1957 vol. 13: Document 138

Wilbur Crane Eveland 1980. *Ropes of Sand: America's Failure in the Middle East*. New York: W.W. Norton, pgs. 248-253

### ***Phillipines 1957***

Joseph Smith. 1976. *Portrait of a Cold Warrior*. New York: Putnam, pgs. 254-255

FRUS 1964-1968 vol. 26: Document 315

### ***Greece 1958 (U.S.)***

Wayne Jackson. 1973. *Allen Welsh Dulles As Director of Central Intelligence: 26 February 1953- 29 November 1961*. CIA Internal Historical Studies (Declassified) vol 3: pg. 97

John Richardson. 2005. *My Father the Spy: An Investigative Memoir*. New York: Harper Collins, pgs. 122-123,131

John Prados 2003. *Lost Crusader: The Secret Wars of CIA Director William Colby*. Oxford: Oxford University Press, pg. 59

### ***Greece 1958 (USSR)***

Spros Linardatos 1978. "The 1958 Greek Election: A reassessment" *Journal of the Hellenic Diaspora* 5(2): 59-80 (see pgs.75-76)

"The Greek Elections" *New York Times*, May 13, 1958

### ***Guatemala 1958***

FRUS 1958-1960 vol. 5 (microfiche volume): Document GT-1

Stephen Schlesinger and Stephen Kinzer 1982. *Bitter Fruit: The Untold Story of the U.S. Coup in Guatemala*. Garden City: Doubleday, pg. 237

### ***Italy 1958***

FRUS 1958-1960 vol. 7(2): Document 209

William Colby 1978. *Honorable Men: My Life at the CIA*. New York: Simon & Schuster, pgs. 115-116,135

John Prados 2003. *Lost Crusader: The Secret Wars of CIA Director William Colby*. Oxford: Oxford University Press, pg. 59

### ***Japan 1958***

FRUS 1955-1957 vol. 23(1): Document 253

FRUS 1964-1968 vol. 29(2): Document 1

Michael Schaller 1997. *Altered States: The United States and Japan Since the Occupation*. New York: Oxford University Press, pg. 136

### ***Laos 1958***

FRUS 1958-1960 vol. 16: Document 162

FRUS 1958-1960 vol. 16: Document 163

FRUS 1958-1960 vol. 16: Document 169

### ***Venezuela 1958***

Valerio Riva 1999. *Oro Da Mosca*. Milan: Mondadori, pgs. 50-51

Berle Diary Entry, November 24, 1958 in 1958 Diary, Box 219, Adolf Berle papers, FDR Library

### ***Malaysia 1959***

FRUS 1958-1960 vol. 15 (microfiche volume): Document 197

FRUS 1958-1960 vol. 15 (microfiche volume): Document 200

### ***Nepal 1959***

Duane Clarridge 1997. *A Spy For All Seasons: My Life at the CIA*. New York: Scribner, pgs. 64-66, 68-69

### ***San Marino 1959***

FRUS 1958-1960 vol. 7(2): Document 223

### ***DRC 1960***

Lise Namikas 2002. *Battleground Africa: The Cold War and the Congo Crisis, 1960-1965*. Ph.D dissertation USC, pgs.102-103, 106-107

### ***Japan 1960***

FRUS 1964-1968 vol. 29(2): Document 1

Michael Schaller 1997. *Altered States: The United States and Japan Since the Occupation*. New York: Oxford University Press, pgs. 159-161

### ***Laos 1960***

Martin Stuart Fox 1997. *A History of Laos*. Cambridge: Cambridge University Press, pgs. 110-111

Stuart Methven 2008. *Laughter in the Shadows: A CIA memoir*. Annapolis: Naval Institute Press, chp.6

### ***Sri Lanka March & July 1960***

Despatch 483 December 21, 1959 “Memorandum of Conversation on UNP Finances in the Forthcoming General Elections” in 746.00 box 3527 Ceylon, RG 59 Central files, NARA

Despatch 1079 April 22, 1959 “U.S. Policy in Current Ceylonese Political Situation” in 120.1443 box 511 Ceylon, RG 59 Central files, NARA

Donald Wilber 1986. *Adventures in the Middle East*. Princeton: Darwin, pgs. 193,196,201

### ***Greece 1961***

James Edward Miller 2009. *The United States and the Making of Modern Greece : History and Power 1950-1974*. Chapel Hill: The University of North Carolina Press, pgs. 75-78, 233

### ***Philippines 1961***

Raymond Bonner 1987. *Waltzing With a Dictator: The Marcoses and the Making of American Policy*. New York: Random house, pg. 43

Karnow Stanley 1989. *In our image: America's Empire in the Philippines*. New York: Random House, pgs. 361-362

FRUS 1964-1968 vol. 26: Document 315

### ***South Vietnam 1961***

“Hearings Before the Committee on Armed Services U.S. Senate, Ninety-Third Congress First Session, on Nomination of William Colby to be Director of Central Intelligence, July 2, 20, and 25, 1973”. Washington D.C: U.S. Government Printing Office, pgs. 84, 94-95

John Prados 2003. *Lost Crusader: The Secret Wars of CIA Director William Colby*. Oxford: Oxford University Press, pgs. 73-74

### ***Brazil 1962***

Tim Weiner 2007. *Legacy of Ashes: The History of the CIA*. New York: Doubleday, pg. 189

Britta Crandell 2011. *Hemispheric Giants The Misunderstood History of U.S. Brazilian Relations* Lanham: Rowmen & Littlefield, pg. 97

### ***Canada 1962***

Knowlton Nash 1990. *Kennedy and Diefenbacker: Fear and Loathing Across the Undefended Border* Toronto: M&S, pg. 169

### ***Finland 1962***

Viktor Vladimirov 1993. *Nain se oli*. Helsinki: Otava, pgs. 125-132

Hannu Rautkallio 1999. *Agenda Suomi*. WSOY, pgs. 132-135, 147-153, 174

### ***Peru 1962***

Richard Walter 2010. *Peru and the United States 1960-1975*. University Park: The Pennsylvania State University Press, pgs. 16-18

FRUS 1969-1972 vol. E-10: Document 582

### ***Italy 1963***

*The Pike Report*. Nottingham: Spokesman Books 1977, pgs. 193, 204-205

### ***Japan 1963***

FRUS 1964-1968 vol. 29 (2): Document 1

Tim Weiner 1994. "CIA Spent Millions to Support Japanese Right in 50's and 60's" *New York Times*, October 9.

### ***Bolivia 1964***

FRUS 1964-1968 vol. 31: Document 147

### ***Chile 1964 (U.S.)***

*Covert Action in Chile 1963-1973: Staff Report of the Select Committee to Study Governmental Operations With Respect to Intelligence Activities, United States Senate* [Church Committee Report]. Washington D.C." U.S. Government Printing Office 1975, pgs. 14-17

FRUS 1964-1968 vol. 31: Document 250

FRUS 1964-1968 vol. 31: Document 253

### ***Chile 1964 (USSR)***

Olga Uliánova & Eugenia Fediakova 1998. "Aspects Of Financial Aid To Chilean Communism from the USSR Communist Party During the Cold War" *Estudios Públicos*, 72, pgs. 12-13

Cord Meyer 1980. *Facing Reality: From World Federalism to the CIA*. New York: Harper & Row, pg. 178

### ***Somalia 1964***

FRUS 1964-1968 vol. 24: Document 283

### ***Sri Lanka 1965***

Colombo 396 December 30, 1964 in Pol 14 election 1.1.64, Box 2002 Ceylon, RG 59 Central files, NARA

Airgram A-211 October 2, 1964 “UNP Approach Re Assistance in Anti- Government Activities” in Pol 12 Political Parties Ceylon, Box 2001 Ceylon, RG 59 Central files , NARA

Robert Keeley 2010. *The Colonels Coup and the American Embassy*. University Park: Penn State Press, pg. 41

### ***Bolivia 1966***

FRUS 1964-1968 vol. 31: Document 147

FRUS 1964-1968 vol. 31: Document 158

FRUS 1964-1968 vol. 31: Document 161

### ***Costa Rica 1966***

FRUS 1964-1968 vol. 31: Document 79

FRUS 1964-1968 vol. 31: Document 81

### ***Dominican Republic 1966***

FRUS 1964-1968 vol. 32: Document 157

FRUS 1964-1968 vol. 32: Document 165

Jefferey Taffet 2007. *Foreign Aid as Foreign policy: The Alliance for Progress in Latin America*. New York: Routledge, pgs.141-142

### ***India 1967***

Christopher Andrew & Vasili Mitrokhin 2005. *The World Was Going Our Way: The KGB and the Battle for the Third World*. New York: Basic Books, pgs.317-318

### ***Laos 1967***

James Lilley 2004. *China Hand: Nine Decades of Adventure, Espionage, and Diplomacy in Asia*. New York: Public Affairs, pgs. 119-120

### ***Finland 1968***

Roy Allison 1985. *Finland's relations with the Soviet Union*. Houndsmill: Macmillan, pg. 151

### ***Guyana 1968***

FRUS 1964-1968 vol. 32: Document 431

FRUS 1964-1968 vol. 32: Document 440

Stephen Rabe 2006. *U.S. Intervention in British Guyana: A Cold War Story*. Chapel Hill: UNC Press, pgs. 158-161

### ***Italy 1968***

John Prados 2006. *Safe for Democracy: The Secret Wars of the CIA*. Chicago: Dee, pgs. 380-381

William Duagherty 2004. *Executive Secrets: Covert Action and The Presidency*. Lexington: The University Press of Kentucky, pgs. 163-164

### ***West Germany 1969***

Michael Sodaro 1990. *Moscow Germany, and the West: From Khrushchev to Gorbachev*. Ithaca: Cornell University Press, pg. 151

Personal Communication Marc Trachtenberg 7.27.11

David Binder 1969. "Soviets Said to Cut Demands on Bonn" *New York Times*, September 20

### ***Thailand 1969***

FRUS 1969-1976 vol. 20: Document 2

FRUS 1969-1976 vol. 20: Document 3

***Chile 1970 (USSR)***

Christopher Andrew & Vasili Mitrokhin 2005. *The World Was Going Our Way: The KGB and the Battle for the Third World*. New York: Basic Books, pgs.70-73

**Chile 1970 (U.S.)**

*Covert Action in Chile 1963-1973: Staff Report of the Select Committee to Study Governmental Operations With Respect to Intelligence Activities, United States Senate [Church Committee Report]*. Washington D.C.” U.S. Government Printing Office 1975, pgs. 19-23

Kristian Gustafson 2007. *Hostile Intent: U.S. Covert Operations in Chile, 1964-1974*. Washington D.C.: Potomac Books, Chp. 3

***Costa Rica 1970***

Christopher Andrew & Vasili Mitrokhin 2005. *The World Was Going Our Way: The KGB and the Battle for the Third World*. New York: Basic Books, pgs. 67-68

***Pakistan 1970***

Christopher Andrew & Vasili Mitrokhin 2005. *The World Was Going Our Way: The KGB and the Battle for the Third World*. New York: Basic Books, pgs. 347-348

***Malta 1971***

“Revised Issues and talking points for Secretary’s Conversation with Maltese Prime Minister Borg Olivier” Tosec 135 October 23, 1970, pol 7 Malta, Box 2467, RG 59 Central files, NARA

Telegram Usun 2699 October 24, 1970, pol 7 Malta, Box 2467, RG 59 Central files, NARA

Valleta 235 March 29, 1971 in Pol Malta, Box 2467, RG 59 Central files, NARA

### ***Uruguay 1971***

FRUS 1969-1972 vol. E-10: Document 141

FRUS 1969-1972 vol. E-10: Document 145

Federico Leicht 2008. *El Dia Menos Pensado Invasion, Golpe y contragolpe 1964-1971* Montevideo: Letraene Chp. 3

### ***South Vietnam 1971***

FRUS 1969-1976 vol. 7: Document 100

FRUS 1969-1976 vol. 7: Document 119

David Corn 1994. *Blond Ghost: Ted Shackley and the CIA's Crusades*. New York: Simon & Schuster, pgs. 218-219

### ***West Germany 1972 (USSR)***

Memorandum of Meeting (Moscow) between VV Zagladin, K. Vinand and O. Zelbmanom August 1-2, 1972, Pavel Stroilov Archive

FRUS 1969-1972 vol. 40: Document 380

FRUS 1969-1972 vol. 29: Document 172

### ***Japan 1972 (USSR)***

CPSU Central Committee Protocol summary CT-33/8 2.29.1972 “About the Order to the foreign trade Department” R. Ulianovsky (Russian) in bukovsky-archives.net

### ***Italy 1972 (U.S.)***

*The Pike Report*. Nottingham: Spokesman Books 1977, pgs. 193- 195, 203-211

Tim Weiner 2007. *Legacy of Ashes: The History of the CIA*. New York: Doubleday, pgs. 299-300

### ***Italy 1972 (USSR)***

Christopher Andrew & Vasili Mitrokhin 1999. *The Sword and The Shield: The Mitrokhin Archive and the Secret History of the KGB*. New York: Basic Books, pgs. 298, 628

Valerio Riva 1999. *Oro Da Mosca*. Milan: Mondadori, pgs. 377

### ***Bangladesh 1973***

Christopher Andrew & Vasili Mitrokhin 2005. *The World Was Going Our Way: The KGB and the Battle for the Third World*. New York: Basic Books, pg. 350

### ***Denmark 1973***

Christopher Andrew & Oleg Gordievsky 1993. *Comrade Kryuchekov's Instructions*. Stanford: Stanford University Press, pg. 170

Valerio Riva 1999. *Oro Da Mosca*. Milan: Mondadori, pg. 56

### ***France 1974***

Christopher Andrew & Vasili Mitrokhin 1999. *The Sword and The Shield: The Mitrokhin Archive and the Secret History of the KGB*. New York: Basic Books, pgs. 468-469

### ***Greece 1974***

Valerio Riva 1999. *Oro Da Mosca*. Milan: Mondadori, pg. 56

FRUS 1969-1976 vol. 30: Document 28

### ***Denmark 1975***

Christopher Andrew & Oleg Gordievsky 1993. *Comrade Kryuchekov's Instructions*. Stanford: Stanford University Press, pg. 170

Valerio Riva 1999. *Oro Da Mosca*. Milan: Mondadori, pg. 56

### ***Italy 1976 (U.S.)***

Bernard Gwertzman 1976. "Secretary Sees Threat: Kissinger Warns West on its Reds" *New York Times*, April 14

Alan Shuster 1976. "U.S. Role Again Becomes an Election Issue in Italy" *New York Times*, June 16

Loch Johnson 2007. *Strategic Intelligence: Understanding the Hidden Side of Government vol.1*. Westport: Praeger, pgs. 37

### ***Italy 1976 (USSR)***

Christopher Andrew & Vasili Mitrokhin 1999. *The Sword and The Shield: The Mitrokhin Archive and the Secret History of the KGB*. New York: Basic Books, pgs. 298, 628

Valerio Riva 1999. *Oro Da Mosca*. Milan: Mondadori, pg. 449

### ***India 1977***

Christopher Andrew & Vasili Mitrokhin 2005. *The World Was Going Our Way: The KGB and the Battle for the Third World*. New York: Basic Books, pgs. 329-330, 333

### ***West Germany 1980***

Christopher Andrew & Vasili Mitrokhin 1999. *The Sword and The Shield: The Mitrokhin Archive and the Secret History of the KGB*. New York: Basic Books, pg. 456

### ***Iran 1980***

David Corn 1993. "Beltway Bandits: Ghosts of Plots Past" *The Nation*, January 4

### ***Jamaica 1980***

Robert Gates 1996. *From The Shadows: The Ultimate Insider's Story of Five Presidents and How They Won the Cold War*. New York: Simon & Schuster, pgs. 175, 178

Memo, National Security Council, Pastor to Brzezinski June 11, 1980, DDRS

Stephens, John and Evelyne Stephens 1986. *Democratic Socialism in Jamaica: The Political Movement and Social Transformation in Dependent Capitalism*. Houndsmill: Macmillan, pg. 236

### ***El Salvador 1982***

Edward Lynch 2011. *The Cold War's Last battlefield: Reagan, the Soviets and Central America*. Albany: SUNY Press, pgs. 100-102

Tom Barry & Deb Preusch 1990. *AIFLD in Central America: Agents as Organizers*. Albuquerque: The Resource Center, pg.34

### ***Mauritius 1982***

Bob Woodward 1987. *Veil: The Secret Wars of the CIA 1981-1987*. New York: Simon and Schuster, pgs. 158-159

Larry Bowman 1991. *Mauritius: Democracy and Development in the Indian Ocean*. Boulder: Westview Press, pgs. 79-80

### ***West Germany 1983***

Jefferey Herf 1991. *War by Other Means: Soviet Power, West German Resistance, and the Battle of the Euromissiles*. New York: Free Press, pgs. 165-167, 171

Martin Walker 1995. *The Cold War: A History*. New York: Holt, pgs. 272-273

### ***Italy 1983***

Bob Woodward 1987. *Veil: The Secret Wars of the CIA 1981-1987*. New York: Simon and Schuster, pgs. 397-398

William Simpson 2008. *The Prince: The Secret Story of the World's Most Intriguing Royal, Prince Bandar bin Sultan*. New York: Harper-Collins, pgs. 99-101

### ***El Salvador 1984***

Thomas Carothers 1991. *In the Name of Democracy: U.S. Policy Toward Latin America in the Reagan Years*. L.A.: UC Press, pg. 30

Jeffrey Richelson 1995. *The U.S. Intelligence Community 3<sup>rd</sup> Edition*. Boulder: Westview Press, pgs. 354

Robert McCartney 1984. "U.S. Seen Assisting Duarte in Sunday's Salvadoran Vote" *The Washington Post*, May 4

### ***Grenada 1984***

Bob Woodward 1987. *Veil: The Secret Wars of the CIA 1981-1987*. New York: Simon and Schuster, pgs. 300

"American Pressure Rewarded by Center Union in Grenada" *Guardian*, August 30, 1984

Joseph Treaster 1984. "U.S. Groups Helping Get Out the Vote in Grenada" *New York Times*, December 2

### ***Panama 1984***

Robert Harding 2006. *A History of Panama*. Westport: Greenwood Press, pg. 97

"Noriega Transcripts Cite Campaign Ties" *Los Angeles Times* March 21, 1992

Ben Franklin 1984 "Project Democracy Takes Wing". *New York Times*, May 29

### ***United States 1984***

Christopher Andrew & Vasili Mitrokhin 1999. *The Sword and The Shield: The Mitrokhin Archive and the Secret History of the KGB*. New York: Basic Books, pg. 243

Christopher Andrew & Oleg Gordievsky 1990. *KGB: The Inside Story of Its Foreign Operations From Lenin to Gorbachev*. London: Hodor and Stanton, pg. 495

### ***Costa Rica 1986***

Martha Honey 1994. *Hostile Acts: U.S. Policy in Costa Rica in the 1980s*. Gainesville: University Press of Florida, pgs. 250, 457-458

Thomas Carothers 1991. *In the Name of Democracy: U.S. Policy Towards Latin America during the Reagan Years*. Berkeley: UC Press, pgs. 231, 286

### ***UK 1987***

Richard Aldous 2012. *Reagan and Thatcher: The Difficult Relationship*. New York: Norton, pgs. 233-236, 241-248

Nicolas Wapshott 2007. *Ronald Reagan and Margaret Thatcher: A Political Marriage*. New York: Sentinel, pgs.249-250, 257-258

### ***Chile 1988 (Plebiscite)***

Thomas Carothers 1991. *In the name of Democracy: U.S. Policy toward Latin America in the Reagan Years*. L.A.: UC Press, pgs.157-159

William Sater 1990. *Chile & the United States*. Athens: University of Georgia Press, pgs. 203-205

### ***France 1988***

Christopher Andrew & Vasili Mitrokhin 1999. *The Sword and The Shield: The Mitrokhin Archive and the Secret History of the KGB*. New York: Basic Books, pg. 306

### ***Panama 1989***

Michael Grow 2008. *U.S. Presidents and Latin American Interventions: Pursuing Regime Change in the Cold War* Lawrence: University Press of Kansas, pgs. 172-173

Doyle McManus 1989. "Bush Orders Aid for Foes of Noriega: CIA Fund Election Efforts in Bid to Oust Panama Chief" *Los Angeles Times*, April 23

### ***Bulgaria 1990***

Thomas Friedman 1990. "Upheaval in the East" *New York Times*, February 11

ADST, Interview with Ambassador Sol Polansky July 1, 1992

National Endowment for Democracy (NED), Annual Report, 1990, pgs. 23-24

### ***Czechoslovakia 1990***

Stephen Engleberg 1990. "Revolution in Europe: U.S grant to two Czech parties is Called Unfair interference" *New York Times*, June 10

Jack Glenn 2003. "Parties out of Movements: Party Emergence in Post Communist Eastern Europe" In Jack Goldstone 2003. *States, Parties and Social Movements*. Cambridge: Cambridge University Press, 147-169 (see pgs. 155-156)

### ***Haiti 1990***

Clifford Griffin 1992. "Haiti's Democratic Challenge." *Third World Quarterly* 13(4): 663-673, (see pg.669)

William Robinson 1996. *Promoting Polyarchy: Globalization, U.S. intervention, and Hegemony*. Cambridge: Cambridge University Press, pgs. 286-288

### ***Nicaragua 1990***

William Robinson 1992. *A Faustian Bargain: U.S. Intervention in the Nicaraguan Elections and American Foreign Policy in the Post Cold War Era*. Boulder: Westview Press, pgs. 52-53, 96-98, 114-115, 130, 136-141

Douglas Waller and Robert Parry 1990. "Bush: Intervention Aboveground" *Newsweek*, March 12

### ***Romania 1990***

Thomas Carothers 1996. *Assessing Democracy Assistance: The Case of Romania*. Washington D.C.: Carnegie Endowment, pgs. 20-21, 37-38, 100

Keith Schuette 1990. "Help for Romania's Democratic Parties" *Washington Times*, May 2

### ***Albania 1991***

Elez Biberaj 1998. *Albania in Transition: The Rocky Road to Democracy*. Boulder: Westview Press, pgs. 97-98

### ***Bulgaria 1991***

*The October 13, 1991 Legislative & Municipal Elections in Bulgaria* appendix 1 “IRI Activities in Bulgaria Since the June 1990 Election” National Democratic Institute and International Republican Institute 1.1.1992

Thomas Carothers 1996. *Assessing Democracy Assistance*. Washington D.C.: Carnegie Endowment, pg. 100

### ***Albania 1992***

Elez Biberaj 1998. *Albania In Transition: The Rocky Road to Democracy*. Boulder: Westview Press, pgs. 130-131, 136

Carol Williams 1992. “U.S. Gives Albania’s Democrats a Helping Hand” *Los Angeles Times* March 9

### ***Israel 1992***

Dennis Ross 2004. *The Missing Peace: The Inside Story of the Fight for Middle East Peace*. New York: Farrar, Straus Giroux, pgs. 83-84

“Baker’s Choice” *The Jerusalem Post* (editorial) February 26, 1992

Ben Zvi, Abraham 2013. *From Truman to Obama: The rise and Early Decline of American Israeli Relations*. Tel Aviv: Miskal (Hebrew), pgs. 200-204

### ***Lithuania 1992***

Fiona Hill and Pamela Jewett 1994. ““Back in the USSR’ Russia’s Intervention in the Internal Affairs of The Former Soviet Republic and the Implications for United States Policy Toward Russia” *Brookings Institute Report*, January, pg. 20

## **Romania 1992**

Thomas Carothers 1996. *Assessing Democracy Assistance: The Case of Romania*. Washington D.C.: Carnegie Endowment, pgs. 20, 38-39, 42

## ***Serbia/ Yugoslavia 1992***

“The U.S. and the Serbs” *Washington Post* (Editorial) December 18, 1992

Anthony Lewis 1992. “Abroad at Home; Pressure on Serbia” *New York Times*, December 18

John Goshko 1992. “Clinton Sympathizes With Russians” *Washington Post*, December 18

## ***Cambodia 1993:***

Krishna Kumar 2005. “Reflections on International Political Party Assistance” *Democratization* 12(4): 505-527, (See pg. 520)

Krishna Kumar Personal Communication 6.27.2011

## ***Belarus 1994***

Kathleen Mihalisko 1997. “Belarus: Retreat to Authoritarianism” in Karen Dawisha and Bruce Parrott (eds.) 1997. *Democratic changes and authoritarian reactions in Russia, Ukraine, Belarus and Moldova*. Cambridge: Cambridge University Press, 223-281 (see pgs. 253-254)

“Chernomyrdin holds talks with Kebich on monetary union” *BBC Summary of World Broadcasts* July 5, 1994

## ***Ukraine 1994***

Liam McDowall 1994. “G-7 Aid Gives Election Boost to Ukraine President” *Associated Press*, July 9

Ian Brzezinski 1994 “After a Rocky Start, U.S. Relations with Ukraine are Improving” *Washington Times*, November 22

### ***Israel 1996***

Dennis Ross 2004. *The Missing Peace: The Inside Story of the Fight for Middle East Peace*. New York: Farrar, Straus Giroux, pgs. 244-249, 257

John Harris 1996. "Israel to Get \$100 Million in U.S. Anti-Terrorism Aid" *Washington Post*, March 15

Michael Katz 1996 "U.S. Gives Peres a Needed Boost" *USA Today*, April 29

### ***Russia 1996***

Strobe Talbot 2002. *The Russia Hand: A Memoir of Presidential Diplomacy*. New York: Random House, pgs. 195-198, 203-205

Lee Marsden 2005. *Lessons from Russia: Clinton and U.S. Democracy Promotion*. Burlington: Ashgate, pgs. 88-89

Michael Kramer 1996. "Rescuing Boris" *Time*, July 15

### ***1998 Latvia***

"Facts on Likely Winners of Latvian Elections" *Baltic New Service* October 4, 1998

### ***Slovakia 1998***

David Reichardt 2002. "Democracy Promotion in Slovakia: An Import or Export Business?" *Perspectives* 18: 5-20 (see pg. 17)

### ***Israel 1999***

Charles Enterline 2003. *Shattered Dreams: The Failure of the Peace Process in the Middle East, 1995-2002*. New York: Other Press, pgs. 107-109

"Mr. Arafat Described the US Letter as 'Very Positive'" *The Australian* April 28, 1999

***Serbia/ Yugoslavia 2000***

Michael Dobbs 2000. "U.S. Advice Guided Milosevic Opposition" *Washington Post*, December 11

Thomas Carothers 2004. *Critical Mission: Essays on Democracy Promotion*. Washington D.C.: Carengie Endowment, pgs. 54-55

"The Alternatives in Yugoslavia" *Washington Post* [Editorial] September 22, 2000

### 3. Codebook- PEIG Dataset 1.0

| Variable       | Description                                                                                                                                                                                                                                          |
|----------------|------------------------------------------------------------------------------------------------------------------------------------------------------------------------------------------------------------------------------------------------------|
| country        | Name of country where election occurred.                                                                                                                                                                                                             |
| year           | Year of election.                                                                                                                                                                                                                                    |
| year 1         | Year of election adjusted to account for cases of 2 <sup>nd</sup> elections that year.                                                                                                                                                               |
| ccodewb        | World Bank country code. A handful of now ‘dead’ states which lack such codes (or whose codes were transferred to a successor state) were given, to enable differentiation, separate three letter code with three identical letters (FFF, YYY etc.). |
| ccodecow       | Correlates of War country code.                                                                                                                                                                                                                      |
| observationid  | The ID number of that election given by the author.                                                                                                                                                                                                  |
| elect_int      | There was a partisan electoral intervention in this election. 1 yes 0 no                                                                                                                                                                             |
| incum_aid      | An incumbent was aided in this election. 1 yes, 0 no. <sup>3</sup>                                                                                                                                                                                   |
| challenger_aid | A challenger was aided in this election. 1 yes, 0 no. <sup>4</sup>                                                                                                                                                                                   |
| us_elect_int   | There was an American partisan electoral intervention in this election. 1 yes, 0 no.                                                                                                                                                                 |
| rus_elect_int  | There was a USSR/Russian partisan electoral intervention in this election. 1 yes, 0 no.                                                                                                                                                              |
| double_int     | There was an intervention by both the U.S and the USSR/Russia in the same election. 1 yes, 0 no, NA not relevant (cases of non intervention).                                                                                                        |
| elect_overt    | There was an overt electoral intervention in this election. <sup>5</sup> 1 yes, 0 no.                                                                                                                                                                |
| elect_covert   | There was a covert electoral intervention in this election. 1 yes, 0 no.                                                                                                                                                                             |

---

<sup>3</sup> In cases of double intervention (where both sides are aided, each by a different intervener) a coding of 1 was given on both the challenger\_aid and the incum\_aid measures. Cases where the exact identity of the assisted side was unclear, or there was no clear incumbent in the election, were left blank.

<sup>4</sup> See the previous footnote.

<sup>5</sup> Overt interventions with a covert component are included.

|               |                                                                                                                                                                                                                                                                                                                                                                                                                                                                   |
|---------------|-------------------------------------------------------------------------------------------------------------------------------------------------------------------------------------------------------------------------------------------------------------------------------------------------------------------------------------------------------------------------------------------------------------------------------------------------------------------|
| covertpart    | Election experienced an overt electoral intervention which also included significant covert components. 1 yes, 0 no.                                                                                                                                                                                                                                                                                                                                              |
| covertexposed | The covert electoral intervention was exposed, becoming public knowledge prior to the election.                                                                                                                                                                                                                                                                                                                                                                   |
| us_overt      | There was an overt electoral intervention by the U.S. in this election. 1 yes, 0 no.                                                                                                                                                                                                                                                                                                                                                                              |
| us_covert     | There was a covert electoral intervention by the U.S. in this election. 1 yes, 0 no.                                                                                                                                                                                                                                                                                                                                                                              |
| rus_overt     | There was an overt electoral intervention by the USSR/Russia in this election. 1 yes, 0 no.                                                                                                                                                                                                                                                                                                                                                                       |
| rus_covert    | There was a covert electoral intervention by the USSR/Russia in this election. 1 yes, 0 no.                                                                                                                                                                                                                                                                                                                                                                       |
| ned           | At least one of the known components of an American electoral intervention was conducted using one or more of the four main affiliates of the (U.S. government funded) National Endowment for Democracy (NED): The National Democratic Institute (NDI), The International Republican Institute (IRI), the Center for International Private Enterprise (CIPE), or the Free Trade Union Institute (FUTI). 1 yes, 0 no, NA not relevant (cases of non intervention). |
| int_cw89      | The electoral intervention occurred during the Cold War era (the Cold War defined as ending in 1989). 1 yes, 0 no, NA not relevant (cases of non intervention).                                                                                                                                                                                                                                                                                                   |
| int_cw91      | The electoral intervention occurred during the Cold War era (the Cold War defined as ending in 1991). 1 yes, 0 no, NA not relevant (cases of non intervention).                                                                                                                                                                                                                                                                                                   |
| int_repeat    | This electoral intervention is a repeat intervention on the side of that intervener (who also intervened in the previous election). 1 yes, 0 no.                                                                                                                                                                                                                                                                                                                  |
| campaign_fund | The electoral intervention included the provision of campaign funding to the favored side. 1 yes, 0 no, NA not relevant (cases of non intervention). <sup>6</sup>                                                                                                                                                                                                                                                                                                 |

---

<sup>6</sup> For a further description of these subtypes see table III in the main paper and Section 1.5 in Appendix A. Given the current state of knowledge about the exact details of many electoral interventions, the incompleteness of these measures as to many cases of interventions must be kept in mind when their use is under consideration.

Note: here and in the following seven subtypes, for cases of double interventions (an intervention by both the U.S and the USSR/Russia in the same election), the data shown is for the American intervention only.

|                  |                                                                                                                                                                                                                                                                                                                                                                                                                                                                                                                                                                                                                                                                      |
|------------------|----------------------------------------------------------------------------------------------------------------------------------------------------------------------------------------------------------------------------------------------------------------------------------------------------------------------------------------------------------------------------------------------------------------------------------------------------------------------------------------------------------------------------------------------------------------------------------------------------------------------------------------------------------------------|
| campaign_assist  | The electoral intervention included the provision of non-monetary assistance to the favored side designed to increase the overall effectiveness of the assisted side's election campaign. 1 yes, 0 no, NA not relevant (cases of non intervention).                                                                                                                                                                                                                                                                                                                                                                                                                  |
| dirtytrick       | The intervention included acts which were designed to directly harm one or more candidate(s) or parties competing against the preferred candidate/party. 1 yes, 0 no, NA not relevant (cases of non intervention).                                                                                                                                                                                                                                                                                                                                                                                                                                                   |
| threatpromise    | The electoral intervention included threats or promises by an official representative of intervening country.                                                                                                                                                                                                                                                                                                                                                                                                                                                                                                                                                        |
| givetakeaid      | The electoral intervention included the provision, increased provision or withdrawal of foreign aid. 1 yes, 0 no, NA not relevant (cases of non intervention).                                                                                                                                                                                                                                                                                                                                                                                                                                                                                                       |
| concession_other | The electoral intervention included a costly concession to the target which was non-economic/material in its nature/ main value. 1 yes, 0 no, NA not relevant.                                                                                                                                                                                                                                                                                                                                                                                                                                                                                                       |
| military         | The electoral intervention included the use of military force in order to threaten/intimidate/coerce voters into voting for the preferred side. Such activities include both the use of the interveners own military forces, such as in 'symbolic' military exercises on the eve of the elections or in troop reinforcements to nearby areas, or funding other significant military forces within that country (rebel/insurgent groups etc.) to carry out military operations for this purpose. This method of electoral intervention is quite rare- and this subtype is accordingly noted here largely for general interest purposes. 1 yes, 0 no, NA not relevant. |
| other            | The electoral intervention included other kinds of costly assistance which do not fall under the above categories. 1 yes, 0 no, NA not relevant.                                                                                                                                                                                                                                                                                                                                                                                                                                                                                                                     |
| campaign_fund1   | This and the following six variables (campaign_assist1 dirtytrick1 threatpromise1 givetakeaid1 military1 other1) provide, for cases of double interventions, the data on the subtypes used in the USSR/Russian intervention only. 1 yes, 0 no, NA not relevant.                                                                                                                                                                                                                                                                                                                                                                                                      |
| elect_int_tri    | Tricotomous version of elect_int. This is the recommended format of this measure when the unit of analysis is the election year Coded as 1 if the                                                                                                                                                                                                                                                                                                                                                                                                                                                                                                                    |

|                  |                                                                                                                                                            |
|------------------|------------------------------------------------------------------------------------------------------------------------------------------------------------|
|                  | intervention is for the incumbent, -1 if it is for a challenger, and 0 when no intervention occurs. <sup>7</sup>                                           |
| us_int_tri       | Trictomous version of us_elect_int. Coded as 1 if the intervention is for the incumbent, -1 if it is for a challenger, and 0 when no intervention occurs.  |
| rus_int_tri      | Trictomous version of rus_elect_int. Coded as 1 if the intervention is for the incumbent, -1 if it is for a challenger, and 0 when no intervention occurs. |
| elect_overt_tri  | Trictomous version of elect_overt. Coded as 1 if the intervention is for the incumbent, -1 if it is for a challenger, and 0 when no intervention occurs    |
| elect_covert_tri | Trictomous version of elect_covert. Coded as 1 if the intervention is for the incumbent, -1 if it is for a challenger, and 0 when no intervention occurs.  |
| us_overt_tri     | Trictomous version of us_overt. Coded as 1 if the intervention is for the incumbent, -1 if it is for a challenger, and 0 when no intervention occurs.      |
| us_covert_tri    | Trictomous version of us_covert. Coded as 1 if the intervention is for the incumbent, -1 if it is for a challenger, and 0 when no intervention occurs.     |
| rus_overt_tri    | Trictomous version of rus_overt. Coded as 1 if the intervention is for the incumbent, -1 if it is for a challenger, and 0 when no intervention occurs.     |
| rus_covert_tri   | Trictomous version of rus_covert. Coded as 1 if the intervention is for the incumbent, -1 if it is for a challenger, and 0 when no intervention occurs.    |
| corr_found_elec  | Election was a founding election. 1 yes, 0 no.                                                                                                             |
| Asia             | Asia                                                                                                                                                       |
| Europe           | Europe                                                                                                                                                     |
| Middle_East      | The Middle East                                                                                                                                            |
| N_America        | North America                                                                                                                                              |
| L_America        | Latin America                                                                                                                                              |
| Africa           | Sub-Saharan Africa                                                                                                                                         |
| Oceania          | Oceania                                                                                                                                                    |

---

<sup>7</sup> Cases of double intervention as well as cases where there is no clear incumbent in the election/identity of assisted side is unclear are left blank.

## 4. Codebook prt. 2: Dataset for the Empirical Comparison<sup>8</sup>

| Variable        | Description                                                                                                                                                                          |
|-----------------|--------------------------------------------------------------------------------------------------------------------------------------------------------------------------------------|
| country         | Name of country where election occurred.                                                                                                                                             |
| year            | Year of election.                                                                                                                                                                    |
| year 1          | Year of election adjusted to account for cases of 2 <sup>nd</sup> elections that year.                                                                                               |
| ccodewb         | World Bank country code.                                                                                                                                                             |
| ccodecow        | Correlates of War country code.                                                                                                                                                      |
| observationid   | The ID number of that election given by the author.                                                                                                                                  |
| incumbent_vote  | The vote share of the incumbent's party (in parliamentary elections) or the incumbent's presidential candidate (in presidential elections).                                          |
| prev_vote       | The incumbent's party/candidates vote share in the previous election. Vote share from previous uncompetitive elections (if any such occurred) is excluded.                           |
| rgdplpcgw       | The real GDP per capita growth rate.                                                                                                                                                 |
| elect_int_tri   | Election experienced a partisan electoral intervention (PEIG). Coded as 1 if the intervention is for the incumbent, -1 if it is for a challenger, and 0 when no intervention occurs. |
| berger_int      | Berger's et.al political influence measure. Coded as 1 if the intervention is for the incumbent, -1 if it is for a challenger, and 0 when no intervention occurs.                    |
| com_openk       | Trade as a percentage of GDP in constant terms.                                                                                                                                      |
| growthtrade     | An interaction between the economic growth rate and trade as a percentage of GDP.                                                                                                    |
| prezelection    | Was this a presidential election. 1 yes 0 no.                                                                                                                                        |
| growthpreselect | An interaction between the economic growth rate measure and the presidential election measure.                                                                                       |

---

<sup>8</sup> For a description of these variables see Appendix A, part 5

|                   |                                                                                                |
|-------------------|------------------------------------------------------------------------------------------------|
| reelection_prez   | A president is running for reelection in this election. 1 yes and 0 no.                        |
| lfrag_com         | The effective number of parties or candidates contesting the election, logged.                 |
| lgcm_rgdpl_pc     | Real GDP per capita in thousands of 2005 constant U.S dollars, logged.                         |
| africa            | Africa                                                                                         |
| asia              | Asia- Including the Middle East east of Egypt, excluding Australia and New Zealand.            |
| eastcentraleurope | Eastern and Central Europe.                                                                    |
| lamericacarribean | Latin America and the Caribbean.                                                               |
| coldwar           | A dummy variable for the Cold War period. Coded as 1 for years prior to 1989 and 0 afterwards. |

## 5. Replication code for the empirical comparison section

Note: Commands are in Stata 11

After dataset is loaded:

\*To turn string into a numeric variable (which Stata can then identify as a country code)

```
encode ccodewb, generate( ccodewb1)
```

\*Settings of panel variables (corrected year1 used in order to enable of any 2<sup>nd</sup> elections in same year)

```
tsset ccodewb1 year1
```

\*\*\* Table III main paper statistical models

\* Model 1: Effects on elections using Berger's Political Influence dataset

```
xtreg incumbent_vote berger_int prev_vote rgdplpcgw com_openk growthtrade prezelection  
growthprezelect reelection_prez lfrag_com lgcm_rgdpl_pc africa asia eastcentraleurope  
lamericacarribean if coldwar==1, vce(r)
```

\*Model 2: Effects on elections using the PEIG dataset (replication of model 1 in Levin 2016)

```
xtreg incumbent_vote elect_int_tri prev_vote rgdplpcgw com_openk growthtrade prezelection  
growthprezelect reelection_prez lfrag_com lgcm_rgdpl_pc africa asia eastcentraleurope  
lamericacarribean, vce(r)
```

\*\*\* Appendix A Section 5.2

\*Model 1 Appendix: Effects on elections using the PEIG dataset, Cold War period only

```
xtreg incumbent_vote elect_int_tri prev_vote rgdplpcgw com_openk growthtrade prezelection  
growthprezelect reelection_prez lfrag_com lgcm_rgdpl_pc africa asia eastcentraleurope  
lamericacarribean if coldwar==1, vce(r)
```
