# Supplementary material
Source: publisher figshare collection journal article supplement (https://sage.figshare.com/ndownloader/files/13992584)
Supplement: Supplementary file 1 [file 13992584 › Data for the empirical comparison section.xls]

## Sheet: Sheet1
country	year	year1	ccodewb	ccodecow	observationid	incumbent_vote	prev_vote	rgdplpcgw	elect_int_tri	berger_int	com_openk	growthtrade	prezelection	growthprezelect	reelection_prez	lfrag_com	lgcm_rgdpl_pc	africa	asia	eastcentraleurope	lamericacarribean	coldwar
Angola	1992	1992	AGO	540	1	49.6		6.03611	0	0	1.05617	6.37516	1	6.03611	1	0.895226	7.59018	1	0	0	0	0
Albania	1991	1991	ALB	339	2	56.2		-12.662	-1	0	0.232199	-2.9401	0	0	0	0.676754	8.08043	0	0	1	0	0
Albania	1992	1992	ALB	339	3	23.7	56.2	-27.5914	-1	0	0.118003	-3.25588	0	0	0	0.667829	7.75758	0	0	1	0	0
Albania	1996	1996	ALB	339	4	55.5	57.3	11.382	0	0	0.290901	3.31103	0	0	0	0.267076	8.00166	0	0	1	0	0
Albania	1997	1997	ALB	339	5	24.1	55.5	-4.78847	0	0	0.289634	-1.3869	0	0	0	0.727549	8.03149	0	0	1	0	0
Argentina	1946	1946	ARG	160	6	53.7		-4.865	-1	0	0.067745	-0.329579	1	-4.865	0	0.737164	8.70506	0	0	0	1	1
Argentina	1951	1951	ARG	160	7	63.5	53.7	3.91565	0	0	0.163478	0.640122	1	3.91565	1	0.672944	8.60883	0	0	0	1	1
Argentina	1958	1958	ARG	160	8	31.7	32.3	2.84602	0	0	0.151696	0.43173	1	2.84602	0	0.97456	8.64621	0	0	0	1	1
Argentina	1963	1963	ARG	160	9			-5.30438	0	0	0.162277	-0.860779	1	-5.30438	0	1.36098	8.66208	0	0	0	1	1
Argentina	1973	1973	ARG	160	10	14.8		0.000699	0	0	0.131417	9.2e-05	1	0.000699	0	1.14125	8.96485	0	0	0	1	1
Argentina	1983	1983	ARG	160	11	39.1		2.2336	0	0	0.173324	0.387136	1	2.2336	0	0.832909	8.95857	0	0	0	1	1
Argentina	1989	1989	ARG	160	12	32.5	48.8	-2.03262	0	0	0.1882	-0.382538	1	-2.03262	0	1.06815	8.92717	0	0	0	1	1
Argentina	1995	1995	ARG	160	13	49.9	47.5	4.17903	0	0	0.328077	1.37104	1	4.17903	1	1.0116	9.04879	0	0	0	1	0
Argentina	1999	1999	ARG	160	14	38.7	49.9	-3.70923	0	0	0.41613	-1.54352	1	-3.70923	0	0.940007	9.11104	0	0	0	1	0
Armenia	1996	1996	ARM	371	15	51.3		5.81146	0	0	0.595037	3.45803	1	5.81146	1	0.832909	7.61535	0	0	1	0	0
Armenia	1998	1998	ARM	371	16	38.5	51.3	0.50455	0	0	0.629816	0.317774	1	0.50455	1	1.29198	7.62038	0	0	1	0	0
Australia	1946	1946	AUS	900	17	49.7	49.9	-4.655	0	0	0.246635	-1.14809	0	0	0	0.874447	9.11976	0	0	0	0	1
Australia	1949	1949	AUS	900	18	46	49.7	3.86558	0	0	0.461404	1.78359	0	0	0	0.963174	9.21264	0	0	0	0	1
Australia	1951	1951	AUS	900	19	50.3	50.3	2.4152	0	0	0.155179	0.374789	0	0	0	0.940007	9.47523	0	0	0	0	1
Australia	1954	1954	AUS	900	20	47.1	50.3	11.3831	0	0	0.146462	1.66719	0	0	0	0.936486	9.46922	0	0	0	0	1
Australia	1955	1955	AUS	900	21	47.6	47.1	1.68014	0	0	0.145427	0.244338	0	0	0	0.947789	9.55501	0	0	0	0	1
Australia	1958	1958	AUS	900	22	46.6	47.6	5.90076	0	0	0.140156	0.827027	0	0	0	0.951086	9.57548	0	0	0	0	1
Australia	1961	1961	AUS	900	23	42.1	46.6	-2.86919	0	0	0.158463	-0.45466	0	0	0	0.922965	9.60034	0	0	0	0	1
Australia	1963	1963	AUS	900	24	46	42.1	4.96501	0	0	0.167667	0.832468	0	0	0	0.976806	9.69629	0	0	0	0	1
Australia	1966	1966	AUS	900	25	50	46	4.57701	0	0	0.168117	0.769473	0	0	0	0.966984	9.79969	0	0	0	0	1
Australia	1969	1969	AUS	900	26	43.3	50	4.37084	0	0	0.177654	0.776497	0	0	0	0.957613	9.92087	0	0	0	0	1
Australia	1972	1972	AUS	900	27	41.5	43.3	-0.2337	0	0	0.177915	-0.041579	0	0	0	0.9031	9.94514	0	0	0	0	1
Australia	1974	1974	AUS	900	28	49.3	49.6	2.63013	0	0	0.185882	0.488895	0	0	0	0.92479	9.9711	0	0	0	0	1
Australia	1975	1975	AUS	900	29	42.8	49.3	1.55947	0	0	0.209706	0.32703	0	0	0	0.918688	9.87843	0	0	0	0	1
Australia	1977	1977	AUS	900	30	48.1	53	0.91959	0	0	0.211283	0.194294	0	0	0	0.896088	9.91879	0	0	0	0	1
Australia	1980	1980	AUS	900	31	46.4	48.1	2.45864	0	0	0.213559	0.525065	0	0	0	0.971044	9.99444	0	0	0	0	1
Australia	1983	1983	AUS	900	32	43.6	46.4	-2.75937	0	0	0.212444	-0.58621	0	0	0	0.802535	9.98886	0	0	0	0	1
Australia	1984	1984	AUS	900	33	47.5	49.5	3.47079	0	0	0.241038	0.836592	0	0	0	0.868452	10.0541	0	0	0	0	1
Australia	1987	1987	AUS	900	34	45.8	47.5	4.26393	0	0	0.24303	1.03626	0	0	0	0.824281	10.1502	0	0	0	0	1
Australia	1990	1990	AUS	900	35	39.4	45.8	1.68121	0	0	0.265227	0.445902	0	0	0	0.85601	10.1866	0	0	0	0	0
Australia	1993	1993	AUS	900	36	44.9	39.4	2.76639	0	0	0.29411	0.813623	0	0	0	0.869132	10.2028	0	0	0	0	0
Australia	1996	1996	AUS	900	37	38.8	44.9	3.15645	0	0	0.333007	1.05112	0	0	0	0.961299	10.2929	0	0	0	0	0
Australia	1998	1998	AUS	900	38	39.5	47.2	4.01467	0	0	0.353841	1.42055	0	0	0	0.907157	10.3974	0	0	0	0	0
Austria	1956	1956	AUT	305	39	46	41.3	10.3151	0	0	0.223264	2.30299	0	0	0	0.802002	8.99786	0	0	0	0	1
Austria	1959	1959	AUT	305	40	44.2	46	3.71847	0	0	0.249379	0.927307	0	0	0	0.787325	9.12562	0	0	0	0	1
Austria	1962	1962	AUT	305	41	45.4	44.2	1.69972	0	0	0.285788	0.48576	0	0	0	0.783902	9.32723	0	0	0	0	1
Austria	1966	1966	AUT	305	42	48.3	45.4	2.45194	0	0	0.321377	0.787998	0	0	0	0.759623	9.43757	0	0	0	0	1
Austria	1970	1970	AUT	305	43	44.7	48.3	5.37966	0	0	0.366473	1.9715	0	0	0	0.752585	9.59878	0	0	0	0	1
Austria	1971	1971	AUT	305	44	50	48.4	4.9775	0	0	0.403904	2.01043	0	0	0	0.793282	9.71274	0	0	0	0	1
Austria	1975	1975	AUT	305	45	50.4	50	-0.06538	0	0	0.438829	-0.028691	0	0	0	0.793282	9.84542	0	0	0	0	1
Austria	1979	1979	AUT	305	46	51	50.4	-1.73237	0	0	0.504716	-0.874355	0	0	0	0.798178	9.93023	0	0	0	0	1
Austria	1983	1983	AUT	305	47	47.6	51	0.88127	0	0	0.530738	0.467723	0	0	0	0.816254	10.0272	0	0	0	0	1
Austria	1986	1986	AUT	305	48	43.1	47.6	1.37886	0	0	0.559001	0.770784	0	0	0	0.966984	10.1067	0	0	0	0	1
Austria	1990	1990	AUT	305	49	42.8	43.1	2.9432	0	0	0.657652	1.9356	0	0	0	1.09629	10.2224	0	0	0	0	0
Austria	1994	1994	AUT	305	50	34.9	42.8	1.09812	0	0	0.669253	0.73492	0	0	0	1.31588	10.2598	0	0	0	0	0
Austria	1995	1995	AUT	305	51	38.1	34.9	2.78899	0	0	0.691903	1.92971	0	0	0	1.2499	10.2873	0	0	0	0	0
Austria	1999	1999	AUT	305	52	33.2	38.1	3.08589	0	0	0.797483	2.46094	0	0	0	1.22588	10.394	0	0	0	0	0
Azerbaijan	1992	1992	AZE	373	53	60.9		-2.17422	0	0	0.842683	-1.83218	1	-2.17422	0	0.721414	8.74588	0	0	1	0	0
Burundi	1965	1965	BDI	516	54	63.6		-1.74504	0	0	0.194133	-0.338769	0	0	0	0.692247	5.79113	1	0	0	0	1
Burundi	1993	1993	BDI	516	55	32.9		-0.63709	0	0	0.206988	-0.13187	1	-0.63709	1	0.616028	6.39765	1	0	0	0	0
Belgium	1946	1946	BEL	211	56	31.6		5.3672	0	0	0.451825	2.42503	0	0	0	1.06658	8.69972	0	0	0	0	1
Belgium	1949	1949	BEL	211	57	29.7	31.6	4.65563	0	0	0.634784	2.95532	0	0	0	1.01021	8.84766	0	0	0	0	1
Belgium	1950	1950	BEL	211	58	47.7	43.5	3.37461	0	0	0.596037	2.01139	0	0	0	0.916291	8.88085	0	0	0	0	1
Belgium	1954	1954	BEL	211	59	41.1	47.7	2.07675	0	0	0.392276	0.814659	0	0	0	0.968447	9.04616	0	0	0	0	1
Belgium	1958	1958	BEL	211	60	35.8	37.8	1.23964	0	0	0.486022	0.602493	0	0	0	0.897532	9.16528	0	0	0	0	1
Belgium	1961	1961	BEL	211	61	41.5	46.5	5.70458	0	0	0.536643	3.06132	0	0	0	0.988574	9.22665	0	0	0	0	1
Belgium	1965	1965	BEL	211	62	34.5	41.5	6.56826	0	0	0.598466	3.93088	0	0	0	1.27809	9.42232	0	0	0	0	1
Belgium	1968	1968	BEL	211	63	27.2	34.5	3.01314	0	0	0.644995	1.94346	0	0	0	1.88251	9.50162	0	0	0	0	1
Belgium	1971	1971	BEL	211	64	30.1	27.2	3.16076	0	0	0.766887	2.42394	0	0	0	1.77326	9.6912	0	0	0	0	1
Belgium	1974	1974	BEL	211	65	26.7	25.3	7.08414	0	0	0.873429	6.18749	0	0	0	1.76644	9.80371	0	0	0	0	1
Belgium	1977	1977	BEL	211	66	36	32.4	5.85746	0	0	0.864516	5.06387	0	0	0	1.66013	9.87438	0	0	0	0	1
Belgium	1978	1978	BEL	211	67	36.3	36	2.58372	0	0	0.883563	2.28288	0	0	0	1.91545	9.90917	0	0	0	0	1
Belgium	1981	1981	BEL	211	68	26.5	36.3	-2.19234	0	0	0.903528	-1.98084	0	0	0	2.03209	9.9576	0	0	0	0	1
Belgium	1985	1985	BEL	211	69	29.2	26.5	1.10439	0	0	0.956547	1.0564	0	0	0	1.94734	9.99384	0	0	0	0	1
Belgium	1987	1987	BEL	211	70	27.5	29.2	2.13153	0	0	1.00193	2.13564	0	0	0	1.96431	10.0386	0	0	0	0	1
Belgium	1991	1991	BEL	211	71	24.6	27.5	1.28962	0	0	1.10792	1.4288	0	0	0	2.12942	10.1807	0	0	0	0	0
Belgium	1995	1995	BEL	211	72	24.9	24.6	3.1618	0	0	1.18683	3.75252	0	0	0	2.08567	10.2094	0	0	0	0	0
Belgium	1999	1999	BEL	211	73	20	24.9	1.76399	0	0	1.35041	2.38211	0	0	0	2.20276	10.2976	0	0	0	0	0
Benin	1960	1960	BEN	434	74	68.7	17.2	4.1124	0	0	0.274003	1.12681	0	0	0	0	6.6132	1	0	0	0	1
Benin	1970	1970	BEN	434	75			3.01026	0	0	0.529496	1.59392	1	3.01026	1	1.14838	6.72386	1	0	0	0	1
Benin	1991	1991	BEN	434	76	27.2		7.38653	0	0	0.364112	2.68953	1	7.38653	1	1.45629	6.92571	1	0	0	0	0
Benin	1996	1996	BEN	434	77	35.7	36.2	8.89187	0	0	0.464648	4.13159	1	8.89187	1	1.24703	6.9417	1	0	0	0	0
Burkina Faso	1978	1978	BFA	439	78	42.2		5.78636	0	0	0.444101	2.56973	1	5.78636	1	1.22165	6.43919	1	0	0	0	1
Bangladesh	1973	1973	BGD	771	79	73.2		-12.2578	1	0	0.363095	-4.45075	0	0	0	0.046903	6.47463	0	1	0	0	1
Bangladesh	1981	1981	BGD	771	80	65.5		-4.04935	0	0	0.180528	-0.731021	1	-4.04935	0	0.697403	6.47953	0	1	0	0	1
Bangladesh	1991	1991	BGD	771	81	30.8		2.90926	0	0	0.21935	0.638145	0	0	0	1.13462	6.63473	0	1	0	0	0
Bangladesh	1996	1996	BGD	771	82	33.6	30.8	-1.28767	0	0	0.300451	-0.386882	0	0	0	0.920283	6.70745	0	1	0	0	0
Bulgaria	1990	1990	BGR	355	83	47.2		-3.07291	-1	0	1.38211	-4.24709	0	0	0	0.884338	8.87608	0	0	1	0	0
Bulgaria	1991	1991	BGR	355	84	33.1	47.2	9.97172	-1	0	0.471368	4.70035	0	0	0	0.879141	8.90465	0	0	1	0	0
Bulgaria	1994	1994	BGR	355	85	7.6	5.4	0.34407	0	0	0.635707	0.218728	0	0	0	1.00406	8.77376	0	0	1	0	0
Bulgaria	1997	1997	BGR	355	86	22.1	43.4	-8.2673	0	0	0.895893	-7.40661	0	0	0	0.92527	8.72219	0	0	1	0	0
Bahamas	1977	1977	BHS	31	87	54.7	59	10.1812	0	0	1.17093	11.9215	0	0	0	0.425268	9.75715	0	0	0	1	1
Bahamas	1982	1982	BHS	31	88	56.9	54.7	-8.69481	0	0	1.0657	-9.26605	0	0	0	0.482426	9.97058	0	0	0	1	1
Bahamas	1987	1987	BHS	31	89	53.5	56.9	0.11001	0	0	1.17175	0.128905	0	0	0	0.672944	10.1902	0	0	0	1	1
Bahamas	1992	1992	BHS	31	90	44.9	53.5	-4.64872	0	0	0.832591	-3.87048	0	0	0	0.582216	10.1393	0	0	0	1	0
Bahamas	1997	1997	BHS	31	91	57.7	55.1	3.97206	0	0	0.850982	3.38015	0	0	0	0.29267	10.1955	0	0	0	1	0
Belarus	1994	1994	BLR	370	92	17.7		-11.932	1	0	1.14833	-13.7019	1	-11.932	1	1.29136	8.4568	0	0	1	0	0
Belize	1984	1984	BLZ	80	93	44	52.4	-0.6952	0	0	1.17704	-0.818278	0	0	0	0.470004	8.44269	0	0	0	1	1
Belize	1989	1989	BLZ	80	94	49	54.1	11.142	0	0	1.23365	13.7453	0	0	0	0.688059	8.7045	0	0	0	1	1
Belize	1993	1993	BLZ	80	95	51.2	50.9	0.62785	0	0	1.50014	0.941862	0	0	0	0.682501	8.77887	0	0	0	1	0
Belize	1998	1998	BLZ	80	96	39.4	48.7	-1.50562	0	0	1.06844	-1.60866	0	0	0	0.205175	8.87091	0	0	0	1	0
Bolivia	1947	1947	BOL	145	97			0.5917	0	0	0.137525	0.081374	1	0.5917	0	0.810486	7.76427	0	0	0	1	1
Bolivia	1951	1951	BOL	145	98	32	47.2	10.0975	0	0	0.429251	4.33436	1	10.0975	0	1.18767	8.0484	0	0	0	1	1
Bolivia	1966	1966	BOL	145	99	67.2		4.53017	1	1	0.523581	2.37191	1	4.53017	1	0.728992	8.03876	0	0	0	1	1
Bolivia	1978	1978	BOL	145	100	50.9		-1.65344	0	0	0.417672	-0.690596	1	-1.65344	0		8.09718	0	0	0	1	1
Bolivia	1979	1979	BOL	145	101			-1.14505	0	0	0.413051	-0.472964	1	-1.14505	0	1.25276	8.08566	0	0	0	1	1
Bolivia	1980	1980	BOL	145	102	20.2	35.9	-1.14505	0	0	0.413051	-0.472965	1	-1.14505	0	1.47018	8.08566	0	0	0	1	1
Bolivia	1985	1985	BOL	145	103	5.5	38.7	-2.40866	0	0	0.38332	-0.923288	1	-2.40866	0	1.51072	7.88152	0	0	0	1	1
Bolivia	1989	1989	BOL	145	104	25.6	30.4	1.09464	0	0	0.404533	0.442818	1	1.09464	0	1.60944	7.87016	0	0	0	1	1
Bolivia	1993	1993	BOL	145	105	21.1	25.2	-0.77555	0	0	0.500223	-0.387948	1	-0.77555	0	1.53902	7.92109	0	0	0	1	0
Bolivia	1997	1997	BOL	145	106	18.2	35.6	1.55245	0	0	0.529743	0.8224	1	1.55245	0	1.77834	8.00625	0	0	0	1	0
Brazil	1950	1950	BRA	140	107	21.5	55.4	0.7511	0	0	0.174573	0.131122	1	0.7511	0	0.985817	7.43808	0	0	0	1	1
Brazil	1955	1955	BRA	140	108	30.3	29.7	3.24485	1	0	0.126823	0.411522	1	3.24485	0	1.08856	7.62136	0	0	0	1	1
Brazil	1960	1960	BRA	140	109	32.9	35.7	3.96555	0	0	0.126376	0.50115	1	3.96555	0	0.97456	7.8116	0	0	0	1	1
Brazil	1962	1962	BRA	140	110	18.3	19.9	2.24151	-1	0	0.100912	0.226195	0	0	0	1.39872	7.93756	0	0	0	1	1
Brazil	1989	1989	BRA	140	111	30.5		-0.87407	0	0	0.126583	-0.110642	1	-0.87407	0	1.73871	8.77741	0	0	0	1	1
Brazil	1994	1994	BRA	140	112	54.3	30.5	4.16675	0	0	0.186752	0.778149	1	4.16675	0	0.97456	8.76046	0	0	0	1	0
Brazil	1998	1998	BRA	140	113	53.1	54.3	-1.60183	0	0	0.227589	-0.364559	1	-1.60183	1	0.928219	8.81202	0	0	0	1	0
Barbados	1966	1966	BRB	53	114	49.6	36.3	4.26482	0	0	0.643682	2.74519	0	0	0	0.780159	9.7742	0	0	0	1	1
Barbados	1971	1971	BRB	53	115	57.4	49.6	-2.38748	0	0	0.62928	-1.50239	0	0	0	0.470004	10.1889	0	0	0	1	1
Barbados	1976	1976	BRB	53	116	46.4	57.4	-8.97677	0	0	0.636666	-5.71521	0	0	0	0.533061	10.0857	0	0	0	1	1
Barbados	1981	1981	BRB	53	117	52.2	52.7	1.11978	0	0	0.880364	0.985814	0	0	0	0.628097	10.1125	0	0	0	1	1
Barbados	1986	1986	BRB	53	118	40.4	52.2	-0.86262	0	0	0.849103	-0.732453	0	0	0	0.220059	9.99795	0	0	0	1	1
Barbados	1991	1991	BRB	53	119	49.8	59.4	-2.90259	0	0	0.665189	-1.93077	0	0	0	0.614677	10.1687	0	0	0	1	0
Barbados	1994	1994	BRB	53	120	38.3	49.8	1.72387	0	0	1.00748	1.73677	0	0	0	0.609972	10.0422	0	0	0	1	0
Barbados	1999	1999	BRB	53	121	64.9	48.3	5.15762	0	0	0.98534	5.08201	0	0	0	0.142315	10.211	0	0	0	1	0
Botswana	1969	1969	BWA	571	122	68.3		-10.5471	0	0	0.771132	-8.13321	0	0	0	0.479397	6.9868	1	0	0	0	1
Botswana	1984	1984	BWA	571	123	68		8.10191	0	0	1.12603	9.12299	0	0	0	0.355714	8.31809	1	0	0	0	1
Botswana	1989	1989	BWA	571	124	64.8	68	20.2216	0	0	1.04468	21.1251	0	0	0	0.175423	8.76415	1	0	0	0	1
Botswana	1994	1994	BWA	571	125	54.7	64.8	-1.92886	0	0	0.892345	-1.72121	0	0	0	0.57759	8.75164	1	0	0	0	0
Botswana	1999	1999	BWA	571	126	57.1	54.7	9.67559	0	0	0.954192	9.23237	0	0	0	0.351333	8.97766	1	0	0	0	0
Central African Republic	1981	1981	CAF	482	127	50.2		-5.66516	0	0	0.406219	-2.3013	1	-5.66516	1	0.878946	6.6692	1	0	0	0	1
Central African Republic	1992	1992	CAF	482	128			-5.8791	0	0	0.364778	-2.14457	1	-5.8791	0		6.41709	1	0	0	0	0
Central African Republic	1993	1993	CAF	482	129	12.1		-3.75666	0	0	0.390049	-1.46528	1	-3.75666	1	1.41585	6.3788	1	0	0	0	0
Central African Republic	1999	1999	CAF	482	130	51.3	37.3	4.75038	0	0	0.418255	1.98687	1	4.75038	1	1.1314	6.40819	1	0	0	0	0
Canada	1949	1949	CAN	20	131	49.5	40.9	-0.32288	0	0	0.392701	-0.126795	0	0	0	0.559644	9.18866	0	0	0	0	1
Canada	1953	1953	CAN	20	132	48.8	49.5	1.42738	0	0	0.290307	0.414378	0	0	0	0.766746	9.42921	0	0	0	0	1
Canada	1957	1957	CAN	20	133	40.9	48.8	5.57688	0	0	0.302691	1.68807	0	0	0	1.05014	9.48071	0	0	0	0	1
Canada	1958	1958	CAN	20	134	53.6	38.9	-2.04857	0	0	0.29749	-0.609429	0	0	0	0.428973	9.46001	0	0	0	0	1
Canada	1962	1962	CAN	20	135	37.3	53.6	0.84403	-1	0	0.290204	0.244941	0	0	0	1.04421	9.47348	0	0	0	0	1
Canada	1963	1963	CAN	20	136	32.8	37.3	4.77683	0	0	0.281172	1.34311	0	0	0	0.973389	9.52014	0	0	0	0	1
Canada	1965	1965	CAN	20	137	40.2	41.7	4.35717	0	0	0.30446	1.32658	0	0	0	0.951395	9.64546	0	0	0	0	1
Canada	1968	1968	CAN	20	138	45.5	40.2	0.79211	0	0	0.342059	0.270948	0	0	0	0.846619	9.69757	0	0	0	0	1
Canada	1972	1972	CAN	20	139	38.5	45.5	4.30601	0	0	0.404519	1.74186	0	0	0	1.04465	9.87013	0	0	0	0	1
Canada	1974	1974	CAN	20	140	43.2	38.5	1.63246	0	0	0.420766	0.686884	0	0	0	0.8671	9.94072	0	0	0	0	1
Canada	1979	1979	CAN	20	141	40.1	43.2	2.73618	0	0	0.401471	1.0985	0	0	0	0.894327	10.039	0	0	0	0	1
Canada	1980	1980	CAN	20	142	32.5	35.9	2.69267	0	0	0.407275	1.09666	0	0	0	0.875469	10.0655	0	0	0	0	1
Canada	1984	1984	CAN	20	143	28	44.3	5.16416	0	0	0.434009	2.24129	0	0	0	0.525444	10.1051	0	0	0	0	1
Canada	1988	1988	CAN	20	144	43	50	3.26202	0	0	0.475804	1.55208	0	0	0	0.847228	10.2282	0	0	0	0	1
Canada	1993	1993	CAN	20	145	16	43	1.46791	0	0	0.574609	0.843474	0	0	0	0.85433	10.1984	0	0	0	0	0
Canada	1997	1997	CAN	20	146	38.5	41.3	0.53792	0	0	0.648435	0.348806	0	0	0	1.09192	10.2636	0	0	0	0	0
Canada	2000	2000	CAN	20	147	40.8	38.5	4.3932	0	0	0.75585	3.3206	0	0	0	0.932164	10.4212	0	0	0	0	0
Switzerland	1947	1947	CHE	225	148			10.6316	0	0	0.447589	4.75859	0	0	0	1.60944	9.43626	0	0	0	0	1
Switzerland	1951	1951	CHE	225	149			7.37294	0	0	0.277082	2.04291	0	0	0	1.56878	9.67802	0	0	0	0	1
Switzerland	1955	1955	CHE	225	150			5.98527	0	0	0.303336	1.81555	0	0	0	1.54923	9.79147	0	0	0	0	1
Switzerland	1959	1959	CHE	225	151			7.65277	0	0	0.337754	2.58475	0	0	0	1.55735	9.89209	0	0	0	0	1
Switzerland	1963	1963	CHE	225	152			2.44439	0	0	0.360024	0.880039	0	0	0	1.56422	10.0535	0	0	0	0	1
Switzerland	1967	1967	CHE	225	153			2.13622	0	0	0.380422	0.812665	0	0	0	1.63424	10.151	0	0	0	0	1
Switzerland	1971	1971	CHE	225	154			1.6457	0	0	0.426334	0.701618	0	0	0	1.70292	10.3064	0	0	0	0	1
Switzerland	1975	1975	CHE	225	155			-9.09521	0	0	0.434992	-3.95634	0	0	0	1.60944	10.2682	0	0	0	0	1
Switzerland	1979	1979	CHE	225	156			3.30459	0	0	0.51706	1.70867	0	0	0	1.62924	10.3417	0	0	0	0	1
Switzerland	1983	1983	CHE	225	157			0.3897	0	0	0.520111	0.202687	0	0	0	1.66013	10.2973	0	0	0	0	1
Switzerland	1987	1987	CHE	225	158			0.71234	0	0	0.590893	0.420917	0	0	0	1.75094	10.3708	0	0	0	0	1
Switzerland	1991	1991	CHE	225	159			-2.21621	0	0	0.612785	-1.35806	0	0	0	1.90211	10.4204	0	0	0	0	0
Switzerland	1995	1995	CHE	225	160			-0.03641	0	0	0.649291	-0.023641	0	0	0	1.72345	10.404	0	0	0	0	0
Switzerland	1999	1999	CHE	225	161			0.53061	0	0	0.774765	0.411098	0	0	0	1.64119	10.4556	0	0	0	0	0
Chile	1946	1946	CHL	155	162	40.2	56	6.5687	0	0	0.104254	0.684813	1	6.5687	0	0.678033	8.54161	0	0	0	1	1
Chile	1952	1952	CHL	155	163	20	40.2	1.83823	0	0	0.230514	0.423738	1	1.83823	0	1.0818	8.09591	0	0	0	1	1
Chile	1958	1958	CHL	155	164			1.85075	0	0	0.208686	0.386226	1	1.85075	0	1.37877	8.17458	0	0	0	1	1
Chile	1964	1964	CHL	155	165	56.1	20.7	-0.40788		1	0.254513	-0.103811	1	-0.40788	0	0.760806	8.28772	0	0	0	1	1
Chile	1970	1970	CHL	155	166	28.1	56.1	0.63332			0.270782	0.171492	1	0.63332	0	1.08519	8.40409	0	0	0	1	1
Chile	1989	1989	CHL	155	167	29.4	44	9.60883	0	0	0.466935	4.4867	1	9.60883	0	0.879826	8.59694	0	0	0	1	1
Chile	1993	1993	CHL	155	168	58	55.2	5.67434	0	0	0.511355	2.9016	1	5.67434	0	0.904218	8.83894	0	0	0	1	0
Chile	2000	2000	CHL	155	169	48	58	-1.64699	0	0	0.617658	-1.01728	1	-1.64699	0	0.783902	9.10769	0	0	0	1	0
Cote d'Ivoire	2000	2000	CIV	437	170	32.7		-3.22166	0	0	0.747728	-2.40893	1	-3.22166	1	0.770154	7.29794	1	0	0	0	0
Cameroon	1960	1960	CMR	471	171	44.9	34.3	2.11199	0	0	0.2888	0.609943	0	0	0	1.13072	7.03802	1	0	0	0	1
Cameroon	1992	1992	CMR	471	172	40		-5.05364	0	0	0.258522	-1.30648	1	-5.05364	1	1.11523	7.3622	1	0	0	0	0
Congo	1992	1992	COG	484	173	16.9		3.87812	0	0	1.06632	4.13531	1	3.87812	1	1.53687	7.70282	1	0	0	0	0
Colombia	1946	1946	COL	100	174	32.3	58.6	1.96888	0	0	0.083715	0.164825	1	1.96888	0	1.06471	7.87478	0	0	0	1	1
Colombia	1966	1966	COL	100	175	71.8		-2.67568	0	0	0.166973	-0.446766	1	-2.67568	0	0.518794	8.05619	0	0	0	1	1
Colombia	1970	1970	COL	100	176	40.7	71.8	3.94823	0	0	0.173289	0.684183	1	3.94823	0	1.0818	8.16562	0	0	0	1	1
Colombia	1974	1974	COL	100	177	31.4	40.7	3.78736	0	0	0.172788	0.654409	1	3.78736	0	0.854415	8.316	0	0	0	1	1
Colombia	1978	1978	COL	100	178	49.5	56.3	2.95109	0	0	0.16101	0.475156	1	2.95109	0	0.770108	8.41151	0	0	0	1	1
Colombia	1982	1982	COL	100	179	41	49.5	1.161	0	0	0.18376	0.213345	1	1.161	0	0.916291	8.5349	0	0	0	1	1
Colombia	1986	1986	COL	100	180	36	46.8	-0.56668	0	0	0.176276	-0.099892	1	-0.56668	0	0.741937	8.50954	0	0	0	1	1
Colombia	1990	1990	COL	100	181	48.2	58.7	0.37675	0	0	0.19047	0.07176	1	0.37675	0	1.11186	8.58464	0	0	0	1	0
Colombia	1994	1994	COL	100	182	45.3	48.2	3.82214	0	0	0.286949	1.09676	1	3.82214	0	0.879627	8.6631	0	0	0	1	0
Colombia	1998	1998	COL	100	183	34.4	45.3	1.16967	0	0	0.323666	0.378583	1	1.16967	0	1.14422	8.72619	0	0	0	1	0
Comoro Is.	1990	1990	COM	581	184	23.1		-5.263	0	0	0.438107	-2.30576	1	-5.263	1	1.81156	7.18274	1	0	0	0	0
Comoro Is.	1996	1996	COM	581	185			7.6809	0	0	0.420928	3.2331	1	7.6809	0	1.40416	7.06777	1	0	0	0	0
C. Verde Is.	1991	1991	CPV	402	186	26.6		0.4138	0	0	0.686134	0.283922	1	0.4138	1	0.494696	7.36623	1	0	0	0	0
Costa Rica	1948	1948	CRI	94	187	44.7		15.7156	0	0	0.360471	5.66501	1	15.7156	0	0.683097	7.94426	0	0	0	1	1
Costa Rica	1953	1953	CRI	94	188	64.7		12.4846	0	0	0.30871	3.85412	1	12.4846	0	0.609766	8.34735	0	0	0	1	1
Costa Rica	1958	1958	CRI	94	189	42.8	64.7	2.83763	0	0	0.309882	0.87933	1	2.83763	0	0.891998	8.40564	0	0	0	1	1
Costa Rica	1962	1962	CRI	94	190	13.5	46.6	-3.59551	0	0	0.273614	-0.983781	1	-3.59551	0	0.924259	8.47122	0	0	0	1	1
Costa Rica	1966	1966	CRI	94	191	49.5	50.3	7.48011	1	0	0.308661	2.30882	1	7.48011	0	0.693047	8.61663	0	0	0	1	1
Costa Rica	1970	1970	CRI	94	192	41.7	50.5	2.23673	-1	-1	0.36471	0.815758	1	2.23673	0	0.756122	8.71403	0	0	0	1	1
Costa Rica	1974	1974	CRI	94	193	43.4	54.8	3.92709	0	0	0.418688	1.64423	1	3.92709	0	1.19392	8.86324	0	0	0	1	1
Costa Rica	1978	1978	CRI	94	194	43.8	43.4	7.27682	0	0	0.45467	3.30855	1	7.27682	0	0.802002	8.98893	0	0	0	1	1
Costa Rica	1982	1982	CRI	94	195	33.6	50.5	-8.57738	0	0	0.404802	-3.47214	1	-8.57738	0	0.774727	8.92661	0	0	0	1	1
Costa Rica	1986	1986	CRI	94	196	52.3	58.8	-0.7469	-1	0	0.41	-0.306229	1	-0.7469	0	0.727549	8.85681	0	0	0	1	1
Costa Rica	1990	1990	CRI	94	197	47.2	52.3	1.50174	0	0	0.560484	0.841701	1	1.50174	0	0.71784	8.89531	0	0	0	1	0
Costa Rica	1994	1994	CRI	94	198	47.7	51.5	4.47748	0	0	0.701507	3.14098	1	4.47748	0	0.746688	8.97899	0	0	0	1	0
Costa Rica	1998	1998	CRI	94	199	44.6	49.6	3.04025	0	0	0.795466	2.41842	1	3.04025	0	0.8671	9.00719	0	0	0	1	0
Czech Rep.	1946	1946	ZZZ	315	200	18.4			0	0			0		0	1.63978		0	0	1	0	1
Czech Rep.	1990	1990	ZZZ	315	201	36.2		0.6779	1	0	0.96113	0.65155	0	0	0	1.34571	9.40454	0	0	1	0	0
Czech Rep.	1992	1992	ZZZ	315	202	23	36.2	-12.617	0	0	0.973026	-12.2767	0	0	0	1.80518	9.24014	0	0	1	0	0
Cuba	1948	1948	CUB	40	203	46.1	55.3	11.9943	0	0			1	11.9943	0	1.09192	7.98513	0	0	0	1	1
Cyprus	1959	1959	CYP	352	204	66.8		4.43658	0	0	0.3957	1.75556	1	4.43658	1	0.58618	8.21033	0	0	0	0	1
Cyprus	1983	1983	CYP	352	205	56.5		4.24768	0	0	0.857365	3.64181	1	4.24768	1	0.815365	9.14717	0	0	0	0	1
Cyprus	1988	1988	CYP	352	206	27.3	56.5	6.98063	0	0	0.824192	5.75338	1	6.98063	1	1.25562	9.34594	0	0	0	0	1
Cyprus	1993	1993	CYP	352	207	44.2	30.1	6.13562	0	0	0.952177	5.8422	1	6.13562	1	1.00796	9.58194	0	0	0	0	0
Cyprus	1998	1998	CYP	352	208	40.1	36.7	-0.15661	0	0	0.975194	-0.152725	1	-0.15661	1	1.0818	9.64348	0	0	0	0	0
Czech Republic	1996	1996	CZE	316	209	29.6	23	5.69545	0	0	0.698051	3.97571	0	0	0	1.42234	9.62001	0	0	1	0	0
Czech Republic	1998	1998	CZE	316	210	27.7	29.6	-0.40431	0	0	0.788901	-0.31896	0	0	0	1.31103	9.6666	0	0	1	0	0
East Germany	1990	1990	GGG	265	211	16.4		3.4917	0	0	0.311066	1.08615	0	0	0	1.38515	9.7379	0	0	1	0	0
German Federal Republic	1953	1953	DEU	255	212	45.2	31	6.10573	1	0	0.200479	1.22407	0	0	0	1.29198	8.84552	0	0	0	0	1
German Federal Republic	1957	1957	DEU	255	213	50.2	45.2	4.03046	-1	0	0.267031	1.07626	0	0	0	1.12168	9.11568	0	0	0	0	1
German Federal Republic	1961	1961	DEU	255	214	45.4	50.2	3.77531	0	0	0.269585	1.01777	0	0	0	1.13462	9.31215	0	0	0	0	1
German Federal Republic	1965	1965	DEU	255	215	47.6	45.4	4.63672	0	0	0.289814	1.34379	0	0	0	1.075	9.46225	0	0	0	0	1
German Federal Republic	1969	1969	DEU	255	216	46.1	47.6	7.0577	-1	0	0.340833	2.4055	0	0	0	0.996949	9.58773	0	0	0	0	1
German Federal Republic	1972	1972	DEU	255	217	45.8	42.7	3.33716	1	0	0.329888	1.10089	0	0	0	1.02604	9.68618	0	0	0	0	1
German Federal Republic	1976	1976	DEU	255	218	42.6	45.8	6.11436	0	0	0.427814	2.61581	0	0	0	1.05082	9.76373	0	0	0	0	1
German Federal Republic	1980	1980	DEU	255	219	42.9	42.6	0.28615	1	0	0.47589	0.136176	0	0	0	1.08519	9.87062	0	0	0	0	1
German Federal Republic	1983	1983	DEU	255	220	48.8	44.5	-1.19411	-1	0	0.512047	-0.61144	0	0	0	1.15057	9.84941	0	0	0	0	1
German Federal Republic	1987	1987	DEU	255	221	44.3	48.8	2.42521	0	0	0.508905	1.2342	0	0	0	1.24416	9.94522	0	0	0	0	1
German Federal Republic	1990	1990	DEU	255	222	43.8	44.3	4.71347	0	0	0.409071	1.92814	0	0	0	1.15373	10.075	0	0	0	0	0
German Federal Republic	1994	1994	DEU	255	223	41.5	43.8	2.16407	0	0	0.428573	0.927462	0	0	0	1.23837	10.2428	0	0	0	0	0
German Federal Republic	1998	1998	DEU	255	224	35.1	41.5	1.89108	0	0	0.542734	1.02635	0	0	0	1.19695	10.2952	0	0	0	0	0
Djibouti	1993	1993	DJI	522	225	60.7		10.2189	0	0	1.47841	15.1077	1	10.2189	1	0.836602	7.59058	1	0	0	0	0
Djibouti	1999	1999	DJI	522	226	74	60.7	-7.88946	0	0	1.41562	-11.1685	1	-7.88946	0	0.485809	7.51406	1	0	0	0	0
Denmark	1947	1947	DNK	390	227	25.4	23.4	4.46943	0	0	0.383751	1.71515	0	0	0	1.26924	9.03101	0	0	0	0	1
Denmark	1950	1950	DNK	390	228	39.6	40	6.9141	0	0	0.205054	1.41776	0	0	0	1.38128	9.09786	0	0	0	0	1
Denmark	1953	1953	DNK	390	229	22.1	17.8	1.34208	0	0	0.21124	0.283501	0	0	0	1.34487	9.07806	0	0	0	0	1
Denmark	1957	1957	DNK	390	230	39.4	41.3	1.75723	0	0	0.254595	0.447383	0	0	0	1.32708	9.1768	0	0	0	0	1
Denmark	1960	1960	DNK	390	231	42.1	39.4	5.64932	0	0	0.290212	1.6395	0	0	0	1.28093	9.35933	0	0	0	0	1
Denmark	1964	1964	DNK	390	232	41.9	42.1	8.36185	0	0	0.314371	2.62872	0	0	0	1.25562	9.548	0	0	0	0	1
Denmark	1966	1966	DNK	390	233	38.2	41.9	2.4034	0	0	0.328156	0.78869	0	0	0	1.37877	9.60597	0	0	0	0	1
Denmark	1968	1968	DNK	390	234	34.2	38.2	5.13497	0	0	0.325125	1.66951	0	0	0	1.44456	9.65605	0	0	0	0	1
Denmark	1971	1971	DNK	390	235	14.4	15	1.8293	0	0	0.357562	0.654088	0	0	0	1.37039	9.79881	0	0	0	0	1
Denmark	1973	1973	DNK	390	236	25.6	37.3	4.41124	-1	0	0.375057	1.65447	0	0	0	1.93007	9.87077	0	0	0	0	1
Denmark	1975	1975	DNK	390	237	23.3	12.3	-1.84947	-1	0	0.384329	-0.710805	0	0	0	1.68928	9.85211	0	0	0	0	1
Denmark	1977	1977	DNK	390	238	37	29.9	7.05773	0	0	0.38651	2.72788	0	0	0	1.64866	9.90552	0	0	0	0	1
Denmark	1979	1979	DNK	390	239	38.3	37	3.57596	0	0	0.402975	1.44102	0	0	0	1.57277	9.97411	0	0	0	0	1
Denmark	1981	1981	DNK	390	240	32.9	38.3	-1.20616	0	0	0.500108	-0.60321	0	0	0	1.69887	9.95224	0	0	0	0	1
Denmark	1984	1984	DNK	390	241	23.4	14.5	2.45155	0	0	0.502602	1.23215	0	0	0	1.61763	10.0126	0	0	0	0	1
Denmark	1987	1987	DNK	390	242	20.8	23.4	-0.15772	0	0	0.527316	-0.083168	0	0	0	1.67001	10.155	0	0	0	0	1
Denmark	1988	1988	DNK	390	243	19.3	20.8	-0.15772	0	0	0.527316	-0.083168	0	0	0	1.67147	10.155	0	0	0	0	1
Denmark	1990	1990	DNK	390	244	16	19.3	1.23508	0	0	0.606005	0.748465	0	0	0	1.47476	10.1724	0	0	0	0	0
Denmark	1994	1994	DNK	390	245	34.6	37.4	5.59983	0	0	0.648593	3.63201	0	0	0	1.51293	10.2447	0	0	0	0	0
Denmark	1998	1998	DNK	390	246	35.9	34.6	3.31172	0	0	0.683496	2.26355	0	0	0	1.54969	10.3288	0	0	0	0	0
Dominican Republic	1962	1962	DOM	42	247			15.5754	0	1	0.654376	10.1922	1	15.5754	0	0.80123	7.8405	0	0	0	1	1
Dominican Republic	1966	1966	DOM	42	248			-12.9111		1	0.506307	-6.53698	1	-12.9111	0	0.737164	7.76807	0	0	0	1	1
Dominican Republic	1970	1970	DOM	42	249	57.2	57.7	6.45442	0	1	0.620949	4.00787	1	6.45442	1	1.13783	7.8441	0	0	0	1	1
Dominican Republic	1978	1978	DOM	42	250	43	57.2	1.97083	0	1	0.677243	1.33473	1	1.97083	1	0.993252	8.34908	0	0	0	1	1
Dominican Republic	1982	1982	DOM	42	251	46.7	52.4	3.80606	0	0	0.658892	2.50778	1	3.80606	0	0.996949	8.41968	0	0	0	1	1
Dominican Republic	1986	1986	DOM	42	252	39.2	46.7	-5.15725	0	0	0.535956	-2.76406	1	-5.15725	0	1.02245	8.41237	0	0	0	1	1
Dominican Republic	1990	1990	DOM	42	253	35.5	41.6	2.72387	0	0	0.565355	1.53995	1	2.72387	1	1.21788	8.51705	0	0	0	1	0
Dominican Republic	1994	1994	DOM	42	254	42.3	35.5	5.45533	0	0	0.620861	3.387	1	5.45533	1	0.996949	8.59434	0	0	0	1	0
Dominican Republic	1996	1996	DOM	42	255	15	42.3	2.711	0	0	0.664334	1.80101	1	2.711	0	0.955511	8.63284	0	0	0	1	0
Dominican Republic	2000	2000	DOM	42	256	24.9	38.9	4.14713	0	0	0.712172	2.95347	1	4.14713	0	1.14422	8.85538	0	0	0	1	0
Algeria	1995	1995	DZA	615	257	61		1.8141	0	0	0.678481	1.23083	1	1.8141	1	0.802302	8.42698	1	0	0	0	0
Algeria	1999	1999	DZA	615	258	73.8	61	4.00303	0	0	0.655434	2.62372	1	4.00303	0	0.572899	8.49449	1	0	0	0	0
Ecuador	1948	1948	ECU	130	259			7.96762	0	0	0.289162	2.30393	1	7.96762	0	1.0116	7.76405	0	0	0	1	1
Ecuador	1952	1952	ECU	130	260	5.1	41.1	-1.503	0	0	0.282241	-0.424208	1	-1.503	0	1.10194	7.63468	0	0	0	1	1
Ecuador	1956	1956	ECU	130	261	29	43	0.75416	0	0	0.365063	0.275316	1	0.75416	0	1.35583	7.7817	0	0	0	1	1
Ecuador	1960	1960	ECU	130	262	22.4	29	2.55763	0	0	0.35105	0.897856	1	2.55763	0	1.075	7.80983	0	0	0	1	1
Ecuador	1966	1966	ECU	130	263			-0.69779	0	1	0.367467	-0.256415	0	0	0	1.50262	7.89114	0	0	0	1	1
Ecuador	1968	1968	ECU	130	264	30.4		4.91587	0	1	0.376497	1.85081	1	4.91587	0	1.21096	7.93913	0	0	0	1	1
Ecuador	1979	1979	ECU	130	265	23.9		4.60115	0	0	0.462608	2.12853	1	4.60115	0	1.56025	8.50253	0	0	0	1	1
Ecuador	1984	1984	ECU	130	266	13.5	27.7	-9.05836	0	0	0.381629	-3.45693	1	-9.05836	0	1.64287	8.43695	0	0	0	1	1
Ecuador	1988	1988	ECU	130	267	14.7	27.2	-7.84838	0	0	0.430663	-3.38	1	-7.84838	0	1.88251	8.37852	0	0	0	1	1
Ecuador	1992	1992	ECU	130	268	8.5	24.5	1.51996	0	0	0.472623	0.718368	1	1.51996	0	1.50408	8.46288	0	0	0	1	0
Ecuador	1996	1996	ECU	130	269			-0.55844	0	0	0.525519	-0.293471	1	-0.55844	0	1.57277	8.47107	0	0	0	1	0
Ecuador	1998	1998	ECU	130	270	26.6	26.3	0.42765	0	0	0.548708	0.234655	1	0.42765	1	1.41099	8.49575	0	0	0	1	0
Egypt	1950	1950	EGY	651	271	8.8	47.4	2.44088	0	0	0.491064	1.19863	0	0	0	0.648364	6.59426	1	0	0	0	1
Spain	1977	1977	ESP	230	272	34.5		2.27903	0	0	0.165043	0.376138	1	2.27903	1	1.06992	9.64742	0	0	0	0	1
Spain	1979	1979	ESP	230	273	35.1	34.5	-0.29787	0	0	0.174915	-0.052102	0	0	0	1.03241	9.6504	0	0	0	0	1
Spain	1982	1982	ESP	230	274	6.5	35.1	0.61853	0	0	0.206837	0.127935	0	0	0	0.845868	9.6546	0	0	0	0	1
Spain	1986	1986	ESP	230	275	37.9	40.8	2.03238	0	0	0.22718	0.461715	0	0	0	1.10557	9.69451	0	0	0	0	1
Spain	1989	1989	ESP	230	276	34.4	37.9	4.94207	0	0	0.2667	1.31805	0	0	0	1.04732	9.88	0	0	0	0	1
Spain	1993	1993	ESP	230	277	34.6	34.4	0.58432	0	0	0.311416	0.181966	0	0	0	0.983302	9.94445	0	0	0	0	0
Spain	1996	1996	ESP	230	278	31.8	34.6	2.88486	0	0	0.380946	1.09898	0	0	0	1.0022	9.97604	0	0	0	0	0
Spain	2000	2000	ESP	230	279	45.2	37.2	4.55936	0	0	0.498623	2.2734	0	0	0	0.908259	10.1259	0	0	0	0	0
Estonia	1992	1992	EST	366	280			-21.7491	0	0	0.776303	-16.8839	0	0	0	1.77494	8.91453	0	0	1	0	0
Estonia	1995	1995	EST	366	281	6	9.7	-0.50503	0	0	1.0525	-0.531546	0	0	0	1.42273	8.86405	0	0	1	0	0
Estonia	1999	1999	EST	366	282	7.6	32.2	7.68474	0	0	1.25984	9.68153	0	0	0	1.7046	9.18945	0	0	1	0	0
Finland	1950	1950	FIN	375	283	22.9		4.70189	1	0	0.39129	1.8398	1	4.70189	1	1.63511	8.65494	0	0	0	0	1
Finland	1956	1956	FIN	375	284	17.9	22.9	7.1127	-1	0	0.234592	1.66858	1	7.1127	1	1.60543	8.96215	0	0	0	0	1
Finland	1962	1962	FIN	375	285	44.2	26.9	6.91792	1	0	0.271038	1.87502	1	6.91792	1	1.66203	9.17568	0	0	0	0	1
Finland	1968	1968	FIN	375	286	60.1	44.2	1.16849	1	0	0.304341	0.355619	1	1.16849	1	1.83258	9.35096	0	0	0	0	1
Finland	1982	1982	FIN	375	287	43.1		1.33936	0	0	0.409798	0.548867	1	1.33936	1	1.32442	9.85892	0	0	0	0	1
Finland	1988	1988	FIN	375	288	48.9	43.1	3.56174	0	0	0.417855	1.48829	1	3.56174	1	1.16002	10.0095	0	0	0	0	1
Finland	1994	1994	FIN	375	289	25.9	48.9	-2.72946	0	0	0.503518	-1.37433	1	-2.72946	0	1.69745	9.94586	0	0	0	0	0
Finland	2000	2000	FIN	375	290	40	25.9	3.49013	0	0	0.65063	2.27078	1	3.49013	0	1.19695	10.2238	0	0	0	0	0
Fiji	1972	1972	FJI	950	291	57.5	64.7	6.75943	0	0	0.863161	5.83448	0	0	0	0.62317	7.907	0	1	0	0	1
Fiji	1977	1977	FJI	950	292	46	57.5	-0.50064	0	0	0.77331	-0.38715	0	0	0	0.768394	8.0398	0	1	0	0	1
Fiji	1982	1982	FJI	950	293	51.8	52.2	-4.48317	0	0	0.800113	-3.58704	0	0	0	0.754143	8.13407	0	1	0	0	1
Fiji	1987	1987	FJI	950	294	49.5	51.8	-8.58945	0	0	0.886576	-7.61519	0	0	0	0.68725	8.05622	0	1	0	0	1
Fiji	1992	1992	FJI	950	295	43.6	49.5	-3.95091	0	0	1.15939	-4.58066	0	0	0	1.31768	8.12835	0	1	0	0	0
Fiji	1994	1994	FJI	950	296	40.9	43.6	1.39296	0	0	1.0983	1.52989	0	0	0	1.17316	8.1667	0	1	0	0	0
Fiji	1999	1999	FJI	950	297	19.9	40.9	-2.37392	0	0	1.12808	-2.67797	0	0	0	1.15324	8.26893	0	1	0	0	0
France	1946	1946	FRA	220	298	21.1	23.8	6.2505	0	0	0.478961	2.99375	0	0	0	1.42544	8.40853	0	0	0	0	1
France	1951	1951	FRA	220	299	50.5	21.1	4.8524	0	0	0.117742	0.571329	0	0	0	1.77834	8.86545	0	0	0	0	1
France	1956	1956	FRA	220	300	30.1	50.5	4.38102	0	0	0.119348	0.522865	0	0	0	1.74635	9.05819	0	0	0	0	1
France	1958	1958	FRA	220	301	27.9	3.9	0.89028	0	0	0.121446	0.108121	0	0	0	1.23547	9.15781	0	0	0	0	1
France	1965	1965	FRA	220	302	44.6	27.9	3.39744	0	0	0.14888	0.505811	1	3.39744	1	1.11841	9.44975	0	0	0	0	1
France	1969	1969	FRA	220	303	44.5	44.6	3.63792	0	0	0.170193	0.619147	1	3.63792	1	1.19392	9.56889	0	0	0	0	1
France	1974	1974	FRA	220	304	15.1	44.5	5.73346	-1	0	0.236856	1.35801	1	5.73346	0	1.1474	9.80883	0	0	0	0	1
France	1981	1981	FRA	220	305	28.3	32.6	1.26981	0	0	0.277965	0.352962	1	1.26981	1	1.58104	9.97215	0	0	0	0	1
France	1988	1988	FRA	220	306	34.1	25.8	2.21621	-1	0	0.299713	0.664226	1	2.21621	1	1.56235	10.0645	0	0	0	0	1
France	1995	1995	FRA	220	307	23.3	33.9	1.86162	0	0	0.369637	0.688124	1	1.86162	0	1.78339	10.1685	0	0	0	0	0
Gabon	1993	1993	GAB	481	308	51.2		1.14981	0	0	0.978137	1.12467	1	1.14981	1	1.08176	9.35231	1	0	0	0	0
Gabon	1998	1998	GAB	481	309	66.9	51.2	-1.84031	0	0	0.895274	-1.64758	1	-1.84031	1	0.708115	9.43484	1	0	0	0	0
United Kingdom	1950	1950	GBR	200	310	46.1	47.7	3.11398	0	0	0.373282	1.16239	0	0	0	0.730693	9.17302	0	0	0	0	1
United Kingdom	1951	1951	GBR	200	311	48.8	46.1	4.3565	0	0	0.197427	0.860091	0	0	0	0.72014	9.14727	0	0	0	0	1
United Kingdom	1955	1955	GBR	200	312	49.7	48	2.77055	0	0	0.191903	0.531676	0	0	0	0.703098	9.21754	0	0	0	0	1
United Kingdom	1959	1959	GBR	200	313	49.4	49.7	2.74471	0	0	0.208106	0.571191	0	0	0	0.686238	9.28687	0	0	0	0	1
United Kingdom	1964	1964	GBR	200	314	43.4	49.4	4.3896	0	0	0.221054	0.970339	0	0	0	0.721069	9.41335	0	0	0	0	1
United Kingdom	1966	1966	GBR	200	315	48	44.1	1.88356	0	0	0.221196	0.416635	0	0	0	0.702261	9.43202	0	0	0	0	1
United Kingdom	1970	1970	GBR	200	316	43.1	48	1.21755	0	0	0.253215	0.308302	0	0	0	0.726742	9.51132	0	0	0	0	1
United Kingdom	1974	1974	GBR	200	317	37.9	46.4	7.37677	0	0	0.283767	2.09328	0	0	0	0.815365	9.65629	0	0	0	0	1
United Kingdom	1979	1979	GBR	200	318	36.9	39.3	3.55465	0	0	0.307954	1.09467	0	0	0	0.765645	9.71132	0	0	0	0	1
United Kingdom	1983	1983	GBR	200	319	42.4	43.9	2.66211	0	0	0.31485	0.838166	0	0	0	0.735589	9.74322	0	0	0	0	1
United Kingdom	1987	1987	GBR	200	320	42.3	42.4	5.20621	1	0	0.326188	1.6982	0	0	0	0.776642	9.91445	0	0	0	0	1
United Kingdom	1992	1992	GBR	200	321	41.9	42.3	-1.7062	0	0	0.346002	-0.590349	0	0	0	0.81978	10.033	0	0	0	0	0
United Kingdom	1997	1997	GBR	200	322	30.7	41.9	2.78771	0	0	0.423623	1.18094	0	0	0	0.751369	10.1424	0	0	0	0	0
Ghana	1979	1979	GHA	452	323			-1.42516	0	0	0.554824	-0.790713	1	-1.42516	0	1.36609	7.21524	1	0	0	0	1
Ghana	1992	1992	GHA	452	324	58.2		-4.23586	0	0	0.462145	-1.95758	1	-4.23586	1	0.824263	7.14137	1	0	0	0	0
Ghana	1996	1996	GHA	452	325	57.4	58.2	3.30595	0	0	0.607581	2.00863	1	3.30595	1	0.717591	7.18887	1	0	0	0	0
Ghana	2000	2000	GHA	452	326	48.4	57.4	4.33544	0	0	1.14389	4.95927	1	4.33544	0	0.839673	7.29826	1	0	0	0	0
Guinea	1993	1993	GIN	438	327	51.7		2.0663	0	0	0.685191	1.41581	1	2.0663	1	1.08424	6.56271	1	0	0	0	0
Guinea	1998	1998	GIN	438	328	56.1	51.7	3.19716	0	0	0.607623	1.94267	1	3.19716	1	0.907888	6.66285	1	0	0	0	0
Gambia	1966	1966	GMB	420	329	65.3	69.4	13.2634	0	0	0.543889	7.21382	0	0	0	0.470004	7.12474	1	0	0	0	1
Gambia	1972	1972	GMB	420	330	63.1	65.3	-2.69438	0	0	0.570902	-1.53823	0	0	0	0.291101	7.13143	1	0	0	0	1
Gambia	1977	1977	GMB	420	331	69.4	63.1	-5.4302	0	0	0.650799	-3.53397	0	0	0	0.355714	7.15568	1	0	0	0	1
Gambia	1982	1982	GMB	420	332	72.4		13.3697	0	0	0.640863	8.56815	1	13.3697	1	0.510239	7.23747	1	0	0	0	1
Gambia	1987	1987	GMB	420	333	59.2	72.4	-1.47829	0	0	0.530753	-0.784607	1	-1.47829	1	0.812431	7.18467	1	0	0	0	1
Gambia	1992	1992	GMB	420	334	58.5	59.2	-1.21564	0	0	0.777885	-0.945628	1	-1.21564	1	0.905869	7.13699	1	0	0	0	0
Gambia	1996	1996	GMB	420	335	55.8		5.40437	0	0	0.702018	3.79397	1	5.40437	1	0.813296	7.04367	1	0	0	0	0
Guinea-Bissau	1994	1994	GNB	404	336	46.2		4.77858	0	0	0.221771	1.05975	1	4.77858	1	1.21544	6.99984	1	0	0	0	0
Guinea-Bissau	2000	2000	GNB	404	337	23.4	46.2	5.46153	0	0	0.316688	1.7296	1	5.46153	1	1.48541	6.73234	1	0	0	0	0
Equatorial Guinea	1968	1968	GNQ	411	338	34.8		1.77778	0	0	0.443489	0.788426	1	1.77778	1	1.12636	6.617	1	0	0	0	1
Greece	1946	1946	GRC	350	339	14.4		-15.988	0	0	0.110591	-1.76813	0	0	0	0.966984	7.16945	0	0	0	0	1
Greece	1950	1950	GRC	350	340	17.2	14.4	3.89689	0	1	0.242444	0.944776	0	0	0	1.74397	7.8586	0	0	0	0	1
Greece	1951	1951	GRC	350	341	19	17.2	7.663	0	1	0.096895	0.742508	0	0	0	1.17248	8.28102	0	0	0	0	1
Greece	1952	1952	GRC	350	342	34.2	23.5	-2.64146	0	1	0.098626	-0.260515	0	0	0	0.371564	8.25425	0	0	0	0	1
Greece	1956	1956	GRC	350	343	47.4	49.2	4.82918	0	1	0.116524	0.562715	0	0	0	0.741937	8.41219	0	0	0	0	1
Greece	1958	1958	GRC	350	344	41.2	47.4	6.49465		1	0.120734	0.784124	0	0	0	0.89355	8.55074	0	0	0	0	1
Greece	1961	1961	GRC	350	345	50.8	41.2	13.1752	1	1	0.137409	1.81039	0	0	0	0.832561	8.7522	0	0	0	0	1
Greece	1963	1963	GRC	350	346	39.4	50.8	12.2406	0	1	0.147708	1.80803	0	0	0	0.881997	8.86108	0	0	0	0	1
Greece	1964	1964	GRC	350	347	52.7	42	12.2406	0	0	0.147708	1.80803	0	0	0	0.816594	8.86108	0	0	0	0	1
Greece	1974	1974	GRC	350	348	54.4		-8.2176	-1	0	0.210746	-1.73183	0	0	0	0.548121	9.56529	0	0	0	0	1
Greece	1977	1977	GRC	350	349	41.8	54.4	0.99603	0	0	0.231183	0.230265	0	0	0	0.854411	9.67618	0	0	0	0	1
Greece	1981	1981	GRC	350	350	35.9	41.8	-3.16478	0	0	0.309245	-0.978692	0	0	0	0.741937	9.71441	0	0	0	0	1
Greece	1985	1985	GRC	350	351	45.8	48.1	1.27354	0	0	0.288127	0.366941	0	0	0	0.760806	9.6931	0	0	0	0	1
Greece	1989	1989	GRC	350	352	39.1	45.8	5.23765	0	0	0.346843	1.81664	0	0	0	0.877176	9.73848	0	0	0	0	1
Greece	1990	1990	GRC	350	353			3.28633	0	0	0.356587	1.17186	0	0	0	0.86289	9.77082	0	0	0	0	0
Greece	1993	1993	GRC	350	354	39.3	46.9	-2.39783	0	0	0.392807	-0.941885	0	0	0	0.776481	9.76067	0	0	0	0	0
Greece	1996	1996	GRC	350	355	41.5	47.1	2.27081	0	0	0.429864	0.976139	0	0	0	0.856711	9.81625	0	0	0	0	0
Greece	2000	2000	GRC	350	356	43.8	41.5	3.24231	0	0	0.565198	1.83255	0	0	0	0.792992	9.91386	0	0	0	0	0
Grenada	1976	1976	GRD	55	357	51.7	58.9	9.69705	0	0	1.10673	10.732	0	0	0	0.653928	8.38537	0	0	0	1	1
Grenada	1984	1984	GRD	55	358			4.60773		1	0.982442	4.52683	0	0	0	0.132895	8.70576	0	0	0	1	1
Grenada	1990	1990	GRD	55	359	17.4	58.6	7.12948	0	1	0.951888	6.78647	0	0	0	1.12564	9.05693	0	0	0	1	0
Grenada	1995	1995	GRD	55	360	30.6	34.5	2.17789	0	1	1.05324	2.29383	0	0	0	0.883499	9.09192	0	0	0	1	0
Grenada	1999	1999	GRD	55	361	62.6	32.4	7.19562	0	0	1.15532	8.31324	0	0	0	0	9.43497	0	0	0	1	0
Guatemala	1950	1950	GTM	90	362	65.4		-1.221	0	0	0.532288	-0.649924	1	-1.221	0	0.756122	7.92491	0	0	0	1	1
Guatemala	1957	1957	GTM	90	363			1.55402	0	1	0.606695	0.942816	1	1.55402	0		7.94328	0	0	0	1	1
Guatemala	1958	1958	GTM	90	364	29.6		1.55402	1	1	0.606695	0.942816	1	1.55402	0	0.783902	7.94328	0	0	0	1	1
Guatemala	1966	1966	GTM	90	365	23.5		2.76238	0	1	0.708179	1.95626	1	2.76238	0	1.03318	8.08275	0	0	0	1	1
Guatemala	1970	1970	GTM	90	366	34.9	44.8	3.1549	0	1	0.678956	2.14204	1	3.1549	0	1.03318	8.26064	0	0	0	1	1
Guatemala	1974	1974	GTM	90	367			4.39947	0	1	0.644917	2.83729	1	4.39947	0	1.02245	8.42994	0	0	0	1	1
Guatemala	1978	1978	GTM	90	368			4.9844	0	1	0.730378	3.6405	1	4.9844	0	1.06815	8.54716	0	0	0	1	1
Guatemala	1982	1982	GTM	90	369			-1.70181	0	1	0.556897	-0.947732	1	-1.70181	0	1.22964	8.62494	0	0	0	1	1
Guatemala	1985	1985	GTM	90	370	20.2		-2.53899	0	0	0.402445	-1.0218	1	-2.53899	0	1.46434	8.48321	0	0	0	1	1
Guatemala	1990	1990	GTM	90	371	17.5	38.6	0.92751	0	0	0.442554	0.410473	1	0.92751	0	1.66203	8.45041	0	0	0	1	0
Guatemala	1995	1995	GTM	90	372	12.9	25.7	1.90415	0	0	0.565387	1.07658	1	1.90415	0	1.55815	8.51215	0	0	0	1	0
Guatemala	1999	1999	GTM	90	373	30.3	36.5	2.54631	0	0	0.65313	1.66307	1	2.54631	0	1.08856	8.57275	0	0	0	1	0
Guyana	1968	1968	GUY	110	374	55.8	40.5	15.6261	1	1	0.642667	10.0424	0	0	0	0.582389	7.69093	0	0	0	1	1
Guyana	1973	1973	GUY	110	375			6.99274	0	1	0.545022	3.8112	0	0	0	0.492248	7.94055	0	0	0	1	1
Guyana	1992	1992	GUY	110	376	42.3		14.8668	0	0	1.40149	20.8357	0	0	0	0.425268	7.73839	0	0	0	1	0
Guyana	1997	1997	GUY	110	377	55.3	53.5	4.54411	0	0	1.06123	4.82235	0	0	0	0.451076	8.05635	0	0	0	1	0
Honduras	1954	1954	HND	91	378	30.8		-14.7294	0	0	1.05313	-15.512	1	-14.7294	0	0.991977	7.57637	0	0	0	1	1
Honduras	1957	1957	HND	91	379	61.9		-2.74227	0	0	1.02142	-2.80101	0	0	0	0.720874	7.693	0	0	0	1	1
Honduras	1965	1965	HND	91	380	55.1		1.29982	0	1	1.11116	1.4443	0	0	0	0.684399	7.66917	0	0	0	1	1
Honduras	1971	1971	HND	91	381	52.6		-0.11211	0	1	1.557	-0.174556	1	-0.11211	0	0.693147	7.76223	0	0	0	1	1
Honduras	1980	1980	HND	91	382	44.2		4.68997	0	1	1.46942	6.89154	0	0	0	0.774746	8.12687	0	0	0	1	1
Honduras	1981	1981	HND	91	383	41.6	49.3	3.72409	0	1	1.28569	4.78802	1	3.72409	0	0.766848	8.11922	0	0	0	1	1
Honduras	1985	1985	HND	91	384	51	53.9	2.51001	0	1	1.11394	2.796	1	2.51001	0	0.760806	8.05879	0	0	0	1	1
Honduras	1989	1989	HND	91	385	44.3	51	2.0086	0	0	1.08732	2.18399	1	2.0086	0	0.756122	8.07246	0	0	0	1	1
Honduras	1993	1993	HND	91	386	43	52.3	-0.17082	0	0	1.12136	-0.191551	1	-0.17082	0	0.760806	8.0385	0	0	0	1	0
Honduras	1997	1997	HND	91	387	52.7	53	2.76501	0	0	1.08749	3.00692	1	2.76501	0	0.774727	8.03704	0	0	0	1	0
Croatia	1992	1992	HRV	344	388	57.8		-14.3034	0	0	0.943895	-13.5009	1	-14.3034	1	0.970779	9.09025	0	0	1	0	0
Croatia	1997	1997	HRV	344	389	61.4	57.8	7.48261	0	0	0.730506	5.46609	1	7.48261	1	0.792992	9.20306	0	0	1	0	0
Croatia	2000	2000	HRV	344	390	22.6	61.4	-1.38767	0	0	0.774742	-1.07509	1	-1.38767	0	1.20896	9.29623	0	0	1	0	0
Haiti	1957	1957	HTI	41	391			-7.73106	0	1	0.340905	-2.63556	1	-7.73106	0	0.519139	7.25581	0	0	0	1	1
Haiti	1988	1988	HTI	41	392			-3.82516	0	0	0.289782	-1.10846	1	-3.82516	1	1.1365	7.25054	0	0	0	1	1
Haiti	1990	1990	HTI	41	393			-1.7551		0	0.225962	-0.396586	1	-1.7551	0	0.731593	7.18677	0	0	0	1	0
Hungary	1947	1947	HUN	310	394	15.3	57	3.06663	-1	-1	0.656572	2.01346	0	0	0	1.84122	7.80643	0	0	1	0	1
Hungary	1990	1990	HUN	310	395	10.9		1.47022	0	0	0.362727	0.533288	0	0	0	1.33237	9.46427	0	0	1	0	0
Hungary	1994	1994	HUN	310	396	11.7	24.7	2.29614	0	0	0.422554	0.970243	0	0	0	1.06335	9.33334	0	0	1	0	0
Hungary	1998	1998	HUN	310	397	32.2	33	3.21362	0	0	0.763704	2.45425	0	0	0	1.4061	9.36875	0	0	1	0	0
Indonesia	1955	1955	IDN	850	398	20.9		0.84043	1	0	0.117537	0.098782	0	0	0	1.84946	7.21911	0	1	0	0	1
Indonesia	1999	1999	IDN	850	399	22.5		-14.4101	0	0	0.687671	-9.90941	0	0	0	1.54116	7.89733	0	1	0	0	0
India	1951	1951	IND	750	400	45		1.02519	0	0	0.140591	0.144132	0	0	0	0.533823	6.3998	0	1	0	0	1
India	1957	1957	IND	750	401	47.8	45	1.60258	0	0	0.150923	0.241867	0	0	0	0.565314	6.50099	0	1	0	0	1
India	1962	1962	IND	750	402	44.7	47.8	1.39191	0	0	0.118017	0.16427	0	0	0	0.615186	6.59875	0	1	0	0	1
India	1967	1967	IND	750	403	40.8	44.7	-2.4807	-1	0	0.120417	-0.29872	0	0	0	1.14103	6.64447	0	1	0	0	1
India	1971	1971	IND	750	404	43.7	40.8	-0.61723	0	0	0.086115	-0.053153	0	0	0	0.751416	6.79559	0	1	0	0	1
India	1977	1977	IND	750	405	34.5	43.7	2.56497	1	0	0.099948	0.256363	0	0	0	0.963174	6.86	0	1	0	0	1
India	1980	1980	IND	750	406	9.4	41.3	-4.00895	0	0	0.11772	-0.471935	0	0	0	0.770108	6.90593	0	1	0	0	1
India	1984	1984	IND	750	407	48	42.7	3.4017	0	0	0.117343	0.399166	0	0	0	0.524728	7.0425	0	1	0	0	1
India	1989	1989	IND	750	408	39.5	48	2.67476	0	0	0.124044	0.331788	0	0	0	1.41342	7.22624	0	1	0	0	1
India	1991	1991	IND	750	409	3.3		3.89795	0	0	0.125163	0.487879	0	0	0	1.28093	7.26448	0	1	0	0	0
India	1996	1996	IND	750	410	28.8	36.5	7.56923	0	0	0.214331	1.62232	0	0	0	1.7613	7.38281	0	1	0	0	0
India	1998	1998	IND	750	411	3.3	8.1	2.46515	0	0	0.21289	0.524807	0	0	0	1.7613	7.4259	0	1	0	0	0
India	1999	1999	IND	750	412	23.8	25.5	9.36142	0	0	0.23748	2.22315	0	0	0	1.76815	7.55464	0	1	0	0	0
Ireland	1948	1948	IRL	205	413	41.9	48.9	1.31229	0	0	0.809116	1.06179	0	0	0	1.26498	8.36232	0	0	0	0	1
Ireland	1951	1951	IRL	205	414	25.8	19.8	1.4395	0	0	0.244763	0.352337	0	0	0	1.15057	8.71435	0	0	0	0	1
Ireland	1954	1954	IRL	205	415	43.4	46.3	4.1011	0	0	0.241851	0.991856	0	0	0	1.10856	8.77915	0	0	0	0	1
Ireland	1957	1957	IRL	205	416	26.6	32	-3.23059	0	0	0.226158	-0.730623	0	0	0	1.00063	8.8103	0	0	0	0	1
Ireland	1961	1961	IRL	205	417	43.8	48.3	5.80663	0	0	0.287661	1.67034	0	0	0	1.02904	8.94937	0	0	0	0	1
Ireland	1965	1965	IRL	205	418	47.7	43.8	4.08056	0	0	0.315115	1.28584	0	0	0	0.967288	9.06981	0	0	0	0	1
Ireland	1969	1969	IRL	205	419	45.7	47.7	8.84311	0	0	0.375212	3.31804	0	0	0	0.897703	9.21961	0	0	0	0	1
Ireland	1973	1973	IRL	205	420	46.2	45.7	6.34859	0	0	0.412911	2.6214	0	0	0	0.947192	9.38537	0	0	0	0	1
Ireland	1977	1977	IRL	205	421	30.5	35.1	3.0573	0	0	0.452722	1.38411	0	0	0	0.86289	9.44207	0	0	0	0	1
Ireland	1981	1981	IRL	205	422	45.3	50.6	-2.63289	0	0	0.529365	-1.39376	0	0	0	0.95935	9.59509	0	0	0	0	1
Ireland	1982	1982	IRL	205	423	37.3	36.5	2.60164	0	0	0.518838	1.34983	0	0	0	0.93723	9.62078	0	0	0	0	1
Ireland	1987	1987	IRL	205	424	27.1	39.2	-0.18582	0	0	0.682439	-0.126811	0	0	0	1.06199	9.60606	0	0	0	0	1
Ireland	1989	1989	IRL	205	425	44.1	44.1	4.65296	0	0	0.75116	3.49512	0	0	0	1.08814	9.6737	0	0	0	0	1
Ireland	1992	1992	IRL	205	426	39.1	44.1	0.43273	0	0	0.871069	0.376938	0	0	0	1.2499	9.84184	0	0	0	0	0
Ireland	1997	1997	IRL	205	427	27.9	24.5	8.33168	0	0	1.1073	9.22569	0	0	0	1.09485	10.0925	0	0	0	0	0
Iran	1947	1947	IRN	630	428			3.9044	0	0	0.050811	0.198387	0	0	0		7.59345	0	1	0	0	1
Iran	1950	1950	IRN	630	429			-5.23	0	0	0.085469	-0.447003	0	0	0		7.77556	0	1	0	0	1
Iran	1952	1952	IRN	630	430			-2.6879	0	0	0.071273	-0.191575	0	0	0		7.74831	0	1	0	0	1
Iran	1980	1980	IRN	630	431	74.5		-10.6571	-1	0	0.69591	-7.41639	1	-10.6571	0	0.533929	9.0567	0	1	0	0	1
Iran	1993	1993	IRN	630	432	64		8.42171	0	0	0.644632	5.4289	1	8.42171	1	0.738407	8.79314	0	1	0	0	0
Iran	1997	1997	IRN	630	433	25.1	64	3.67014	0	0	0.53335	1.95747	1	3.67014	0	0.599979	8.79556	0	1	0	0	0
Iceland	1946	1946	ISL	395	434	39.5	38.5		0	0	0.868577		0		0	1.28093	9.26726	0	0	0	0	1
Iceland	1949	1949	ISL	395	435	16.5	17.8	-3.77407	0	0	0.575037	-2.17023	0	0	0	1.24319	9.33613	0	0	0	0	1
Iceland	1953	1953	ISL	395	436	21.9	24.5	-3.72597	0	0	0.343419	-1.27957	0	0	0	1.23553	9.21531	0	0	0	0	1
Iceland	1956	1956	ISL	395	437	42.4	37.1	9.44985	1	0	0.383382	3.6229	0	0	0	1.24576	9.49324	0	0	0	0	1
Iceland	1959	1960	ISL	395	438	15.2	12.5	1.4441	0	0	0.383394	0.553659	0	0	0	1.13383	9.5542	0	0	0	0	1
Iceland	1963	1963	ISL	395	439	41.4	39.7	5.70773	0	0	0.432507	2.46863	0	0	0	1.20212	9.58134	0	0	0	0	1
Iceland	1967	1967	ISL	395	440	37.5	41.4	7.60346	0	0	0.43024	3.27132	0	0	0	1.26695	9.88807	0	0	0	0	1
Iceland	1971	1971	ISL	395	441	36.2	37.5	7.63784	0	0	0.462328	3.53119	0	0	0	1.34921	9.86277	0	0	0	0	1
Iceland	1974	1974	ISL	395	442	24.9	25.3	7.46098	0	0	0.459332	3.42706	0	0	0	1.2189	10.1078	0	0	0	0	1
Iceland	1978	1978	ISL	395	443	32.7	42.7	12.6355	0	0	0.449054	5.67402	0	0	0	1.34707	10.2524	0	0	0	0	1
Iceland	1979	1979	ISL	395	444	24.9	16.9	2.97348	0	0	0.465989	1.38561	0	0	0	1.33012	10.3256	0	0	0	0	1
Iceland	1983	1983	ISL	395	445			3.24476	0	0	0.411953	1.33669	0	0	0	1.40364	10.444	0	0	0	0	1
Iceland	1987	1987	ISL	395	446	18.9	19	4.17949	0	0	0.479802	2.00533	0	0	0	1.6771	10.4392	0	0	0	0	1
Iceland	1991	1991	ISL	395	447	18.9	18.9	-0.47107	0	0	0.456581	-0.215082	0	0	0	1.32708	10.4854	0	0	0	0	0
Iceland	1995	1995	ISL	395	448	37.1	38.6	-1.12438	0	0	0.446752	-0.502319	0	0	0	1.37353	10.4759	0	0	0	0	0
Iceland	1999	1999	ISL	395	449	40.7	37.1	2.62682	0	0	0.564393	1.48256	0	0	0	1.23962	10.5278	0	0	0	0	0
Israel	1949	1949	ISR	666	450	35.7	33.5	11.1292	1	0	0.329412	3.66609	0	0	0	1.55393	8.26182	0	0	0	0	1
Israel	1951	1951	ISR	666	451	37.3	35.7	7.43619	0	0	0.249397	1.85456	0	0	0	1.57485	8.56781	0	0	0	0	1
Israel	1955	1955	ISR	666	452	32.2	37.3	10.1992	0	0	0.253816	2.58872	0	0	0	1.79093	8.64938	0	0	0	0	1
Israel	1959	1959	ISR	666	453	38.2	32.2	7.16575	0	0	0.284631	2.03959	0	0	0	1.59331	8.81703	0	0	0	0	1
Israel	1961	1961	ISR	666	454	34.7	38.2	8.66421	0	0	0.343877	2.97942	0	0	0	1.68083	8.93531	0	0	0	0	1
Israel	1965	1965	ISR	666	455	36.7	34.7	4.61837	0	0	0.350821	1.62022	0	0	0	1.68083	9.13778	0	0	0	0	1
Israel	1969	1969	ISR	666	456	46.2	36.7	11.4076	0	0	0.441887	5.04087	0	0	0	1.27257	9.36664	0	0	0	0	1
Israel	1973	1973	ISR	666	457	39.6	46.2	7.86519	0	0	0.527317	4.14745	0	0	0	1.20896	9.6219	0	0	0	0	1
Israel	1977	1977	ISR	666	458	24.6	39.6	-4.25736	0	0	0.535326	-2.27907	0	0	0	1.47452	9.62396	0	0	0	0	1
Israel	1981	1981	ISR	666	459	37.1	33.4	-0.76709	0	0	0.548119	-0.420457	0	0	0	1.13943	9.62897	0	0	0	0	1
Israel	1984	1984	ISR	666	460	34.9	37.1	-1.62049	0	0	0.581827	-0.942845	0	0	0	1.35067	9.67166	0	0	0	0	1
Israel	1988	1988	ISR	666	461	31.1	34.9	0.55437	0	0	0.622633	0.345169	0	0	0	1.47705	9.76234	0	0	0	0	1
Israel	1992	1992	ISR	666	462	24.9	31.1	5.24243	-1	0	0.585947	3.07179	0	0	0	1.47999	9.84079	0	0	0	0	0
Israel	1996	1996	ISR	666	463	49.5	34.7	2.79722	1	0	0.690992	1.93286	0	0	0	1.72633	9.94222	0	0	0	0	0
Israel	1999	1999	ISR	666	464	43.9	50.5	1.30889	-1	0	0.717828	0.939557	0	0	0	2.16217	9.9859	0	0	0	0	0
Italy	1948	1948	ITA	325	465	48.5	35.2	16.6961		1	0.161518	2.69672	0	0	0	1.05779	8.30511	0	0	0	0	1
Italy	1953	1953	ITA	325	466	40.1	48.5	3.70326		1	0.088444	0.327532	0	0	0	1.26499	8.67675	0	0	0	0	1
Italy	1958	1958	ITA	325	467	42.3	40.1	3.6012	1	1	0.128301	0.462038	0	0	0	1.24127	8.89934	0	0	0	0	1
Italy	1963	1963	ITA	325	468	38.3	42.3	5.7357	1	1	0.159746	0.916257	0	0	0	1.31847	9.20283	0	0	0	0	1
Italy	1968	1968	ITA	325	469	39.1	38.3	6.33087	1	1	0.201124	1.27329	0	0	0	1.26022	9.40477	0	0	0	0	1
Italy	1972	1972	ITA	325	470	38.7	39.1	0.6975		1	0.245882	0.171502	0	0	0	1.2681	9.57204	0	0	0	0	1
Italy	1976	1976	ITA	325	471	38.7	38.7	-4.52902		1	0.251987	-1.14126	0	0	0	1.15373	9.66404	0	0	0	0	1
Italy	1979	1979	ITA	325	472	38.3	38.7	2.37411	0	1	0.291007	0.690881	0	0	0	1.24353	9.77115	0	0	0	0	1
Italy	1983	1983	ITA	325	473	32.9	38.3	0.32292	1	1	0.283937	0.091689	0	0	0	1.41342	9.88611	0	0	0	0	1
Italy	1987	1987	ITA	325	474	14.3	11.4	3.27978	0	0	0.30386	0.996593	0	0	0	1.4061	9.98791	0	0	0	0	1
Italy	1992	1992	ITA	325	475	29.6	34.3	1.5107	0	0	0.352326	0.532259	0	0	0	1.74572	10.1328	0	0	0	0	0
Italy	1994	1994	ITA	325	476			-1.67711	0	0	0.373725	-0.626778	0	0	0	2.02683	10.1183	0	0	0	0	0
Italy	1996	1996	ITA	325	477	43.3	34.4	3.15787	0	0	0.427261	1.34923	0	0	0	1.80336	10.1718	0	0	0	0	0
Jamaica	1967	1967	JAM	51	478	50.7	50	-0.80727	0	0	0.644849	-0.520567	0	0	0	0.634723	8.91092	0	0	0	1	1
Jamaica	1972	1972	JAM	51	479	43.4	50.7	2.13656	0	0	0.692327	1.4792	0	0	0	0.547323	9.06658	0	0	0	1	1
Jamaica	1976	1976	JAM	51	480	56.8	56.4	-7.33189	0	0	0.604066	-4.42895	0	0	0	0.414676	8.99599	0	0	0	1	1
Jamaica	1980	1980	JAM	51	481	41.1	56.8	-6.23615	-1	0	0.934375	-5.8269	0	0	0	0.29437	8.86004	0	0	0	1	1
Jamaica	1989	1989	JAM	51	482	43.3	58.9	2.96204	0	0	0.8992	2.66347	0	0	0	0.470004	8.92919	0	0	0	1	1
Jamaica	1993	1993	JAM	51	483	60	56.6	9.07179	0	0	1.19821	10.87	0	0	0	0.23081	9.12782	0	0	0	1	0
Jamaica	1997	1997	JAM	51	484	56.2	60	-1.86393	0	0	0.832066	-1.55091	0	0	0	0.325426	9.10651	0	0	0	1	0
Japan	1952	1952	JPN	740	485	48	44.4	9.33294	1	1	0.050687	0.473063	0	0	0	1.08519	8.12126	0	1	0	0	1
Japan	1953	1953	JPN	740	486	39.5	48	9.33294	1	1	0.050687	0.473063	0	0	0	1.32708	8.12126	0	1	0	0	1
Japan	1955	1955	JPN	740	487	36.6	18	4.07148	0	1	0.055964	0.227857	0	0	0	1.29746	8.21688	0	1	0	0	1
Japan	1958	1958	JPN	740	488	59	36.6	6.36606	1	1	0.073737	0.469414	0	0	0	0.625938	8.40276	0	1	0	0	1
Japan	1960	1960	JPN	740	489	58.1	59	11.8838	1	1	0.076019	0.903398	0	0	0	0.678033	8.62951	0	1	0	0	1
Japan	1963	1963	JPN	740	490	56	58.1	7.4968	1	1	0.081818	0.613375	0	0	0	0.703098	8.88508	0	1	0	0	1
Japan	1967	1967	JPN	740	491	49.2	56	9.82112	0	1	0.093046	0.913813	0	0	0	0.86289	9.12255	0	1	0	0	1
Japan	1969	1969	JPN	740	492	49.1	49.2	11.2146	0	0	0.103728	1.16327	0	0	0	0.845868	9.43771	0	1	0	0	1
Japan	1972	1972	JPN	740	493	48.4	49.1	7.19185	-1	0	0.119089	0.85647	0	0	0	0.908259	9.6279	0	1	0	0	1
Japan	1976	1976	JPN	740	494	43.2	48.4	2.60765	0	0	0.141209	0.368224	0	0	0	1.08856	9.70154	0	1	0	0	1
Japan	1979	1979	JPN	740	495	45.8	43.2	4.79137	0	0	0.147646	0.707427	0	0	0	1.12817	9.82397	0	1	0	0	1
Japan	1980	1980	JPN	740	496	48.4	45.8	4.79137	0	0	0.147646	0.707426	0	0	0	0.989541	9.82397	0	1	0	0	1
Japan	1983	1983	JPN	740	497	47	48.4	2.54627	0	0	0.150165	0.382361	0	0	0	1.11186	9.89045	0	1	0	0	1
Japan	1986	1986	JPN	740	498	50	47	2.72031	0	0	0.147068	0.400071	0	0	0	0.920283	10.022	0	1	0	0	1
Japan	1990	1990	JPN	740	499	47.2	50	4.99134	0	0	0.165451	0.825822	0	0	0	0.92437	10.1759	0	1	0	0	0
Japan	1993	1993	JPN	740	500	37.4	47.2	-0.23894	0	0	0.16739	-0.039996	0	0	0	1.37118	10.256	0	1	0	0	0
Japan	1996	1996	JPN	740	501	32.8	37.4	2.26013	0	0	0.202825	0.458411	0	0	0	1.07707	10.2956	0	1	0	0	0
Japan	2000	2000	JPN	740	502	28.3	32.8	-0.69367	0	0	0.211982	-0.147046	0	0	0	1.15057	10.275	0	1	0	0	0
Kenya	1992	1992	KEN	501	503	36.6		-4.70951	0	0	0.407174	-1.91759	1	-4.70951	1	1.31728	7.00754	1	0	0	0	0
Kenya	1997	1997	KEN	501	504	40.4	36.6	-4.05704	0	0	0.55314	-2.24411	1	-4.05704	1	1.2609	6.99354	1	0	0	0	0
Kyrgyzstan	1995	1995	KGZ	703	505	72.4		-18.0213	0	0	1.14332	-20.6041	1	-18.0213	1	0.457425	7.18766	0	1	0	0	0
Cambodia	1972	1972	KHM	811	506	54.9		-4.91132	0	0	0.096095	-0.471955	1	-4.91132	1	0.90687	6.90116	0	1	0	0	1
Cambodia	1993	1993	KHM	811	507	38.2		3.48019	-1	0	0.167406	0.582605	0	0	0	0.86453	6.62455	0	1	0	0	0
Cambodia	1998	1998	KHM	811	508	41.4	38.2	3.36315	0	0	0.651995	2.19276	0	0	0	0.880589	6.78892	0	1	0	0	0
South Korea	1948	1948	KOR	732	509	26.1		6.8534	0	0	1.7164	11.7632	0	0	0	1.1181	6.96964	0	1	0	0	1
South Korea	1950	1950	KOR	732	510	6.8	26.1	6.6098	0	1	1.7164	11.345	0	0	0	0.889885	7.03364	0	1	0	0	1
South Korea	1952	1952	KOR	732	511	74.6		6.1313	0	1	0.15977	0.979598	1	6.1313	1	0.540678	7.05346	0	1	0	0	1
South Korea	1956	1956	KOR	732	512	55.6	74.6	6.9424	0	1	0.044439	0.308515	1	6.9424	1	0.949168	7.38764	0	1	0	0	1
South Korea	1960	1960	KOR	732	513	2.8		-1.978	0	1	0.0441	-0.08723	0	0	0	0.493372	7.42058	0	1	0	0	1
South Korea	1963	1963	KOR	732	514	46.6		7.06507	0	1	0.058537	0.413568	1	7.06507	1	0.860093	7.49871	0	1	0	0	1
South Korea	1967	1967	KOR	732	515	51.4	46.6	10.4833	0	1	0.068873	0.72202	1	10.4833	1	0.836836	7.66338	0	1	0	0	1
South Korea	1971	1971	KOR	732	516	53.2	51.4	5.648	0	1	0.126723	0.71573	1	5.648	1	0.716722	7.94778	0	1	0	0	1
South Korea	1987	1987	KOR	732	517	35.9		10.0788	0	1	0.336967	3.39623	1	10.0788	0	1.22908	9.07261	0	1	0	0	1
South Korea	1992	1992	KOR	732	518	42	35.9	3.0022	0	1	0.353215	1.06042	1	3.0022	0	1.13499	9.47704	0	1	0	0	0
South Korea	1997	1997	KOR	732	519	38.7	38.7	3.0131	0	0	0.500841	1.50908	1	3.0131	0	1.05211	9.76219	0	1	0	0	0
Laos	1955	1955	LAO	812	520	56.4	48.7	1.06903	1	1	0.289032	0.308984	0	0	0	0.982078	6.80038	0	1	0	0	1
Laos	1958	1958	LAO	812	521	19	56.4	0.95818	1	1	0.326874	0.313204	0	0	0	1.22964	6.82843	0	1	0	0	1
Laos	1960	1960	LAO	812	522	57.6		0.87242	1	1	0.487222	0.425063	0	0	0	0.835874	6.83712	0	1	0	0	1
Laos	1965	1965	LAO	812	523	23.7		0.91932	0	1	0.265074	0.243688	0	0	0	1.56615	6.89348	0	1	0	0	1
Laos	1967	1967	LAO	812	524	52.4	23.7	1.00002		1	0.365896	0.365904	0	0	0	0.685992	6.90343	0	1	0	0	1
Laos	1972	1972	LAO	812	525			2.84982	0	1	0.128496	0.366191	0	0	0		6.36288	0	1	0	0	1
Lebanon	1947	1947	LBN	660	526				0	0			0		0	2.77446		0	1	0	0	1
Lebanon	1951	1951	LBN	660	527			14.3183	0	0	1.89647	27.1542	0	0	0	3.95929	8.12083	0	1	0	0	1
Lebanon	1953	1953	LBN	660	528			12.0446	0	0	1.39524	16.8051	0	0	0	3.54357	8.13255	0	1	0	0	1
Lebanon	1957	1957	LBN	660	529			-4.94663	1	1	1.70237	-8.42099	0	0	0	3.79729	8.24271	0	1	0	0	1
Lebanon	1960	1960	LBN	660	530			5.56984	0	1	1.47443	8.21234	0	0	0	3.82297	8.10691	0	1	0	0	1
Lebanon	1964	1964	LBN	660	531			-1.93213	0	1	1.69692	-3.27868	0	0	0	3.7894	8.13313	0	1	0	0	1
Lebanon	1968	1968	LBN	660	532			-7.57804	0	1	1.47873	-11.2059	0	0	0	3.50014	8.18587	0	1	0	0	1
Lebanon	1972	1972	LBN	660	533			7.14976	0	1	0.594662	4.25169	0	0	0	3.51363	9.35273	0	1	0	0	1
Lebanon	1992	1992	LBN	660	534			-4.33613	0	0	0.4538	-1.96774	0	0	0	2.36064	8.86892	0	1	0	0	0
Lebanon	1996	1996	LBN	660	535	19.5	2.3	3.64538	0	0	0.495654	1.80685	0	0	0	2.03177	9.10415	0	1	0	0	0
Lebanon	2000	2000	LBN	660	536	0	3.1	-0.31357	0	0	0.503232	-0.157798	0	0	0	1.82099	9.02137	0	1	0	0	0
Liberia	1985	1985	LBR	450	537	50.9		-4.22151	0	0	0.760523	-3.21056	1	-4.22151	1	1.03603	6.8948	1	0	0	0	1
St. Lucia	1979	1979	LCA	56	538	43.8	53.4	-0.01416	0	0	1.4266	-0.020201	0	0	0	0.536529	8.65792	0	0	0	1	1
St. Lucia	1982	1982	LCA	56	539	16.7	56.2	1.71184	0	0	1.17171	2.00578	0	0	0	0.363121	8.61699	0	0	0	1	1
St. Lucia	1987	1987	LCA	56	540	52.5	56.2	14.5989	0	0	1.19713	17.4768	0	0	0	0.689691	8.86474	0	0	0	1	1
St. Lucia	1992	1992	LCA	56	541	56.7	53.2	0.395	0	0	1.31026	0.517551	0	0	0	0.610178	9.11079	0	0	0	1	0
St. Lucia	1997	1997	LCA	56	542	36.6	56.7	7.52108	0	0	1.29923	9.77164	0	0	0	0.117347	9.24026	0	0	0	1	0
Sri Lanka	1952	1952	LKA	780	543	44.1	39.8	3.79223	0	0	1.42374	5.39916	0	0	0	1.01885	6.46483	0	1	0	0	1
Sri Lanka	1956	1956	LKA	780	544	27.9	44.1	2.08114	1	0	1.43186	2.9799	0	0	0	1.08856	6.48041	0	1	0	0	1
Sri Lanka	1960	1960	LKA	780	545	20.9	39.5	-0.6322	-1	0	1.74923	-1.10587	0	0	0	1.49306	6.37233	0	1	0	0	1
Sri Lanka	1965	1965	LKA	780	546	30.2	33.6	1.27714	-1	0	1.26859	1.62017	0	0	0	1.26692	6.52747	0	1	0	0	1
Sri Lanka	1970	1970	LKA	780	547	37.9	39.3	6.94393	0	0	1.05385	7.31788	0	0	0	0.912283	6.71408	0	1	0	0	1
Sri Lanka	1977	1977	LKA	780	548	29.7	36.3	-2.36739	0	0	0.592482	-1.40264	0	0	0	0.34359	6.96785	0	1	0	0	1
Sri Lanka	1982	1982	LKA	780	549	52.9	50.9	4.01121	0	0	0.588751	2.3616	1	4.01121	1	0.831721	7.29809	0	1	0	0	1
Sri Lanka	1988	1988	LKA	780	550	50.4	52.9	1.12556	0	0	0.591146	0.66537	1	1.12556	0	0.779508	7.41802	0	1	0	0	1
Sri Lanka	1994	1994	LKA	780	551	35.9	50.4	4.19697	0	0	0.688927	2.89141	1	4.19697	0	0.65752	7.6901	0	1	0	0	0
Sri Lanka	1999	1999	LKA	780	552	51.5	62.3	2.79302	0	0	0.692205	1.93334	1	2.79302	1	0.81093	7.87386	0	1	0	0	0
Lesotho	1970	1970	LSO	570	553			-1.46414	0	0	0.567702	-0.831195	0	0	0		6.25335	1	0	0	0	1
Lesotho	1993	1993	LSO	570	554	22.7		-1.18758	0	0	1.55946	-1.85198	0	0	0	0	6.68536	1	0	0	0	0
Lesotho	1998	1998	LSO	570	555	60.6	74.8	7.48777	0	0	1.47045	11.0104	0	0	0	0.025317	6.94104	1	0	0	0	0
Lithuania	1992	1992	LTU	368	556	21.2	54.1	-21.2605	-1	0	0.396507	-8.42994	1	-21.2605	1	1.01523	9.09288	0	0	1	0	0
Lithuania	1993	1993	LTU	368	557	61.1	44	-21.2605	0	0	0.396507	-8.42994	1	-21.2605	1	0.678033	9.09288	0	0	1	0	0
Lithuania	1998	1998	LTU	368	558	45.3	61.1	6.29311	0	0	0.969701	6.10244	1	6.29311	0	1.18784	9.01126	0	0	1	0	0
Luxembourg	1948	1948	LUX	212	559	36.3	44.7	15.7449	0	0	0.680329	10.7117	0	0	0	1.18833	9.49579	0	0	0	0	1
Luxembourg	1951	1951	LUX	212	560	42.1	36.3	-7.8763	0	0	1.03508	-8.15261	0	0	0	0.994732	9.61974	0	0	0	0	1
Luxembourg	1954	1954	LUX	212	561	45.2	42.1	2.42491	0	0	1.21051	2.93537	0	0	0	0.984783	9.63339	0	0	0	0	1
Luxembourg	1959	1959	LUX	212	562	38.9	45.2	0.32867	0	0	1.35073	0.443944	0	0	0	1.14556	9.74478	0	0	0	0	1
Luxembourg	1964	1964	LUX	212	563	35.7	38.9	0.61428	0	0	1.50959	0.927312	0	0	0	1.153	9.8135	0	0	0	0	1
Luxembourg	1968	1968	LUX	212	564	37.5	35.7	4.68315	0	0	1.64954	7.72504	0	0	0	1.22671	9.93469	0	0	0	0	1
Luxembourg	1974	1974	LUX	212	565	29.9	37.5	7.87417	0	0	1.9315	15.2089	0	0	0	1.40118	10.1933	0	0	0	0	1
Luxembourg	1979	1979	LUX	212	566	21.9	23.3	3.68694	0	0	1.88329	6.94358	0	0	0	1.24034	10.2088	0	0	0	0	1
Luxembourg	1984	1984	LUX	212	567	36.7	36.4	3.28052	0	0	1.90673	6.25507	0	0	0	1.16938	10.2646	0	0	0	0	1
Luxembourg	1989	1989	LUX	212	568	32.4	36.7	7.9969	0	0	2.05316	16.4189	0	0	0	1.32802	10.564	0	0	0	0	1
Luxembourg	1994	1994	LUX	212	569	30.3	32.4	2.97402	0	0	2.01161	5.98257	0	0	0	1.35998	10.8187	0	0	0	0	0
Luxembourg	1999	1999	LUX	212	570	30.1	30.3	5.51248	0	0	2.39768	13.2172	0	0	0	1.46726	10.9446	0	0	0	0	0
Latvia	1993	1993	LVA	367	571	2.6	68.2	-31.1801	0	0	0.703805	-21.9447	0	0	0	1.61949	9.02391	0	0	1	0	0
Latvia	1995	1995	LVA	367	572	14.7	32.4	2.24055	0	0	0.756432	1.69482	0	0	0	2.02647	8.7027	0	0	1	0	0
Latvia	1998	1998	LVA	367	573	14.7	12	3.94592	-1	0	1.00362	3.9602	0	0	0	1.70265	8.87626	0	0	1	0	0
Moldova	1996	1996	MDA	359	574	38.8		-2.2897	0	0	0.80637	-1.84634	1	-2.2897	1	1.36609	7.41457	0	0	1	0	0
Madagascar	1960	1960	MDG	580	575	61.6		-0.554	0	0	0.826985	-0.45815	0	0	0	0.837425	6.95761	1	0	0	0	1
Madagascar	1989	1989	MDG	580	576	62.7		-0.22636	0	0	0.457174	-0.103486	1	-0.22636	1	0.790673	6.78372	1	0	0	0	1
Madagascar	1993	1993	MDG	580	577	28.6	62.7	-2.43642	0	0	0.506298	-1.23356	1	-2.43642	1	1.17866	6.70516	1	0	0	0	0
Madagascar	1996	1996	MDG	580	578	23.4	45.9	-0.97442	0	0	0.587674	-0.572641	1	-0.97442	0	1.4884	6.64617	1	0	0	0	0
Mexico	1952	1952	MEX	70	579	74.3		0.80643	0	0	0.150218	0.12114	1	0.80643	0	0.53817	8.27647	0	0	0	1	1
Mexico	1982	1982	MEX	70	580	74.3		-5.72825	0	0	0.13775	-0.789066	1	-5.72825	0	0.542545	9.23717	0	0	0	1	1
Mexico	1988	1988	MEX	70	581	50.7	74.3	-0.54931	0	0	0.178064	-0.097812	1	-0.54931	0	0.790673	9.09217	0	0	0	1	1
Mexico	1994	1994	MEX	70	582	50.1	50.7	3.06586	0	0	0.269065	0.824916	1	3.06586	0	1.04255	9.23216	0	0	0	1	0
Mexico	2000	2000	MEX	70	583	36.9	50.1	5.76838	0	0	0.49899	2.87836	1	5.76838	0	1.04028	9.3396	0	0	0	1	0
Macedonia	1994	1994	MKD	343	584	53.3	27.7	-0.85437	0	0	0.810245	-0.692249	0	0	0	1.15688	8.63105	0	0	1	0	0
Macedonia	1998	1998	MKD	343	585	25.1	53.3	2.84626	0	0	0.990259	2.81854	0	0	0	1.075	8.64055	0	0	1	0	0
Macedonia	1999	1999	MKD	343	586	33.1		4.13581	0	0	0.974814	4.03164	1	4.13581	0	1.53902	8.68108	0	0	1	0	0
Mali	1992	1992	MLI	432	587			-3.07713	0	0	0.471981	-1.45235	1	-3.07713	0	1.35583	6.44537	1	0	0	0	0
Malta	1966	1966	MLT	338	588	47.9	42	2.11	0	0	0.518962	1.09501	0	0	0	0.67885	8.17341	0	0	0	0	1
Malta	1971	1971	MLT	338	589	48.1	47.9	13.4514	1	0	2.20784	29.6985	0	0	0	0.692817	8.22472	0	0	0	0	1
Malta	1976	1976	MLT	338	590	51.5	50.8	18.1886	0	0	2.1662	39.4002	0	0	0	0.69102	8.7722	0	0	0	0	1
Malta	1981	1981	MLT	338	591	49.1	51.5	3.049	0	0	1.75383	5.34743	0	0	0	0.69102	9.14899	0	0	0	0	1
Malta	1987	1987	MLT	338	592	48.9	49.1	5.17473	0	0	1.65549	8.56673	0	0	0	0.692937	9.27639	0	0	0	0	1
Malta	1992	1992	MLT	338	593	51.8	50.9	5.43308	0	0	2.01205	10.9317	0	0	0	0.692937	9.53704	0	0	0	0	0
Malta	1996	1996	MLT	338	594	47.8	51.8	2.52531	0	0	1.93413	4.88428	0	0	0	0.692937	9.72279	0	0	0	0	0
Malta	1998	1998	MLT	338	595	47	50.7	3.97575	0	0	1.83604	7.29964	0	0	0	0.68725	9.80203	0	0	0	0	0
Myanmar	1951	1951	MMR	775	596	58.8		-5.1	0	0	1.5666	-7.98967	0	0	0	0.951658	6.30632	0	1	0	0	1
Myanmar	1956	1956	MMR	775	597	59.2	58.8	11.2665	0	0	1.03684	11.6816	0	0	0	0.871293	6.47119	0	1	0	0	1
Myanmar	1960	1960	MMR	775	598	16.4	59.2	13.6088	0	0	0.702031	9.5538	0	0	0	0.765747	6.64407	0	1	0	0	1
Myanmar	1990	1990	MMR	775	599	21.2		2.28702	0	0	0.082804	0.189374	0	0	0	0.419966	6.9779	0	1	0	0	0
Mongolia	1990	1990	MNG	712	600	61.3		12.9158	0	0	0.444545	5.74165	0	0	0	0.319849	8.03705	0	1	0	0	0
Mongolia	1993	1993	MNG	712	601	59.9	61.3	-16.3236	0	0	0.805026	-13.1409	1	-16.3236	1	0.652325	7.61472	0	1	0	0	0
Mongolia	1997	1997	MNG	712	602	30.6	59.9	-0.57916	0	0	0.822413	-0.476309	1	-0.57916	1	0.71784	7.61237	0	1	0	0	0
Mozambique	1994	1994	MOZ	541	603	53.3		-2.26079	0	0	0.545359	-1.23294	1	-2.26079	1	0.916147	5.83017	1	0	0	0	0
Mozambique	1999	1999	MOZ	541	604	52.3	53.3	2.49621	0	0	0.523173	1.30595	1	2.49621	1	0.69105	6.07576	1	0	0	0	0
Mauritania	1992	1992	MRT	435	605	62.7		-2.06812	0	0	0.597893	-1.23651	1	-2.06812	1	0.689536	7.35164	1	0	0	0	0
Mauritius	1976	1976	MUS	590	606	38.1	54.6	20.2554	0	0	0.974063	19.73	0	0	0	0.891998	8.12201	1	0	0	0	1
Mauritius	1982	1982	MUS	590	607	24.8	38.1	6.57824	1	0	0.91731	6.03429	0	0	0	0.19062	8.09587	1	0	0	0	1
Mauritius	1983	1983	MUS	590	608	41.7	63	-0.717	0	0	0.912281	-0.654105	0	0	0	0.631272	8.10159	1	0	0	0	1
Mauritius	1987	1987	MUS	590	609	40.5	41.7	9.69068	0	0	1.25025	12.1158	0	0	0	0.666567	8.38566	1	0	0	0	1
Mauritius	1991	1991	MUS	590	610	55.4	40.5	2.15976	0	0	1.32725	2.86654	0	0	0	0.958729	8.56891	1	0	0	0	0
Mauritius	1995	1995	MUS	590	611	19.5	55.4	2.73708	0	0	1.2859	3.51961	0	0	0	0.19062	8.714	1	0	0	0	0
Mauritius	2000	2000	MUS	590	612	36.6	65.2	6.89364	0	0	1.29734	8.94339	0	0	0	0.34359	8.93325	1	0	0	0	0
Malawi	1994	1994	MWI	553	613	33.5		13.7355	0	0	0.452276	6.21224	1	13.7355	1	0.993252	6.28966	1	0	0	0	0
Malawi	1999	1999	MWI	553	614	52.4	47.2	-4.16434	0	0	0.481394	-2.00469	1	-4.16434	1	0.737164	6.15632	1	0	0	0	0
Malaysia	1959	1959	MYS	820	615	51.8		6.67786	1	0	0.847016	5.65625	0	0	0	0.634262	7.22403	0	1	0	0	1
Malaysia	1964	1964	MYS	820	616	58.5	51.8	3.85034	0	0	0.855386	3.29353	0	0	0	0.300082	7.40035	0	1	0	0	1
Malaysia	1969	1969	MYS	820	617	44.8	58.5	4.91726	0	0	0.787609	3.87288	0	0	0	1.1445	7.56885	0	1	0	0	1
Malaysia	1974	1974	MYS	820	618	60.8	44.8	7.70584	0	0	0.872643	6.72445	0	0	0	0.254448	8.06018	0	1	0	0	1
Malaysia	1978	1978	MYS	820	619	57.2	60.8	4.65091	0	0	0.840177	3.90759	0	0	0	0.307154	8.2229	0	1	0	0	1
Malaysia	1982	1982	MYS	820	620	60.5	57.2	3.80548	0	0	0.891513	3.39264	0	0	0	0.298592	8.39193	0	1	0	0	1
Malaysia	1986	1986	MYS	820	621	57.3	60.5	-2.80095	0	0	1.00427	-2.81291	0	0	0	0.331165	8.42378	0	1	0	0	1
Malaysia	1990	1990	MYS	820	622	53.4	57.3	7.75379	0	0	1.37158	10.6349	0	0	0	0.653569	8.66814	0	1	0	0	0
Malaysia	1995	1995	MYS	820	623	65.2	53.4	8.17635	0	0	1.70227	13.9183	0	0	0	0.331072	8.95978	0	1	0	0	0
Malaysia	1999	1999	MYS	820	624	56.6	65.2	3.84438	0	0	1.85763	7.14144	0	0	0	0.492315	9.08193	0	1	0	0	0
Niger	1993	1993	NER	436	625	34.3		-3.22039	0	0	0.419898	-1.35224	1	-3.22039	0	1.4327	6.26964	1	0	0	0	0
Niger	1996	1996	NER	436	626	52.2	34.3	1.50071	0	0	0.551671	0.827898	1	1.50071	1	1.06618	6.23669	1	0	0	0	0
Niger	1999	1999	NER	436	627			-2.40347	0	0	0.45562	-1.09507	1	-2.40347	0	1.48914	6.26811	1	0	0	0	0
Nigeria	1964	1964	NGA	475	628			0.99959	0	0	0.321226	0.321094	0	0	0	1.04732	7.37055	1	0	0	0	1
Nigeria	1979	1979	NGA	475	629			-3.30714	0	0	0.684511	-2.26377	1	-3.30714	0	1.39377	7.40018	1	0	0	0	1
Nigeria	1983	1983	NGA	475	630	47.5	33.8	-9.56272	0	0	0.541429	-5.17753	1	-9.56272	1	1.06471	7.14637	1	0	0	0	1
Nigeria	1993	1993	NGA	475	631			-4.76005	0	0	0.441083	-2.09958	1	-4.76005	0		7.00059	1	0	0	0	0
Nigeria	1999	1999	NGA	475	632			-0.22352	0	0	0.563578	-0.125971	1	-0.22352	0	0.631272	7.02428	1	0	0	0	0
Nicaragua	1947	1947	NIC	93	633			5.202	0	1	0.166854	0.867975	1	5.202	0	0.638944	7.63682	0	0	0	1	1
Nicaragua	1967	1967	NIC	93	634			0.86261	0	1	0.375498	0.323908	1	0.86261	0	0.546583	8.15208	0	0	0	1	1
Nicaragua	1984	1984	NIC	93	635	67		0.24424	0	0	0.323895	0.079108	1	0.24424	1	0.732368	8.08122	0	0	0	1	1
Nicaragua	1990	1990	NIC	93	636	40.8	67	-9.4831	-1	0	0.37125	-3.5206	1	-9.4831	1	0.760806	7.68861	0	0	0	1	0
Nicaragua	1996	1996	NIC	93	637	51	54.8	3.39152	0	0	0.579096	1.96402	1	3.39152	0	0.904218	7.54492	0	0	0	1	0
Netherlands	1946	1946	NLD	210	638	28.3		1.3968	0	0	0.436599	0.609842	0	0	0	1.497	8.22151	0	0	0	0	1
Netherlands	1948	1948	NLD	210	639	31	30.8	8.75828	0	0	0.698197	6.11501	0	0	0	1.54365	8.93642	0	0	0	0	1
Netherlands	1952	1952	NLD	210	640	29	25.6	-2.03765	0	0	0.248382	-0.506115	0	0	0	1.53712	9.20144	0	0	0	0	1
Netherlands	1956	1956	NLD	210	641	32.7	29	5.26594	0	0	0.293664	1.54642	0	0	0	1.40478	9.38704	0	0	0	0	1
Netherlands	1959	1959	NLD	210	642	30.4	32.7	-5.0187	0	0	0.325863	-1.63541	0	0	0	1.4207	9.3913	0	0	0	0	1
Netherlands	1963	1963	NLD	210	643	31.9	31.6	5.29225	0	0	0.374541	1.98216	0	0	0	1.50408	9.5521	0	0	0	0	1
Netherlands	1967	1967	NLD	210	644	26.5	31.9	1.11021	0	0	0.427245	0.474332	0	0	0	1.74233	9.69126	0	0	0	0	1
Netherlands	1971	1971	NLD	210	645	21.8	26.5	5.1077	0	0	0.524738	2.6802	0	0	0	1.85562	9.88235	0	0	0	0	1
Netherlands	1972	1972	NLD	210	646	8.8	8.6	0.85189	0	0	0.579917	0.494025	0	0	0	1.85786	9.91127	0	0	0	0	1
Netherlands	1977	1977	NLD	210	647	33.8	27.3	4.10505	0	0	0.595341	2.44391	0	0	0	1.30785	10.0282	0	0	0	0	1
Netherlands	1981	1981	NLD	210	648	30.8	31.9	0.34874	0	0	0.632615	0.220618	0	0	0	1.45861	10.0858	0	0	0	0	1
Netherlands	1982	1982	NLD	210	649	29.4	30.8	-1.85265	0	0	0.65904	-1.22097	0	0	0	1.39128	10.0242	0	0	0	0	1
Netherlands	1986	1986	NLD	210	650	34.5	29.4	2.07857	0	0	0.705506	1.46644	0	0	0	1.25006	10.0845	0	0	0	0	1
Netherlands	1989	1989	NLD	210	651	35.3	34.5	3.61686	0	0	0.780313	2.82228	0	0	0	1.32242	10.182	0	0	0	0	1
Netherlands	1994	1994	NLD	210	652	22.2	35.3	0.28391	0	0	0.83858	0.238081	0	0	0	1.68825	10.2431	0	0	0	0	0
Netherlands	1998	1998	NLD	210	653	29	24	3.92995	0	0	1.01587	3.9923	0	0	0	1.5707	10.3612	0	0	0	0	0
Norway	1949	1949	NOR	385	654	45.7	41	1.61947	0	0	0.620504	1.00489	0	0	0	0.982906	8.88733	0	0	0	0	1
Norway	1953	1953	NOR	385	655	46.7	45.7	6.13986	0	0	0.346384	2.12675	0	0	0	1.12783	9.28326	0	0	0	0	1
Norway	1957	1957	NOR	385	656	48.3	46.7	3.13967	0	0	0.399159	1.25323	0	0	0	1.09595	9.37797	0	0	0	0	1
Norway	1961	1961	NOR	385	657	46.8	48.3	5.52309	0	0	0.453334	2.5038	0	0	0	1.16789	9.48787	0	0	0	0	1
Norway	1965	1965	NOR	385	658	43.1	46.8	5.14434	0	0	0.49673	2.55535	0	0	0	1.25628	9.6342	0	0	0	0	1
Norway	1969	1969	NOR	385	659	9	9.4	2.9267	0	0	0.538323	1.57551	0	0	0	1.15596	9.76457	0	0	0	0	1
Norway	1973	1973	NOR	385	660	11.9	7.8	4.78934	0	0	0.584612	2.79991	0	0	0	1.42072	9.92258	0	0	0	0	1
Norway	1977	1977	NOR	385	661	42.3	35.3	3.40102	0	0	0.593642	2.01899	0	0	0	1.08809	10.092	0	0	0	0	1
Norway	1981	1981	NOR	385	662	37.2	42.3	1.11951	0	0	0.555578	0.621975	0	0	0	1.16315	10.1868	0	0	0	0	1
Norway	1985	1985	NOR	385	663	30.4	31.7	5.0662	0	0	0.582944	2.95331	0	0	0	1.12767	10.3183	0	0	0	0	1
Norway	1989	1989	NOR	385	664	34.3	40.8	1.11906	0	0	0.620354	0.694213	0	0	0	1.4422	10.3752	0	0	0	0	1
Norway	1993	1993	NOR	385	665	36.9	34.3	2.45958	0	0	0.660048	1.62344	0	0	0	1.39652	10.4669	0	0	0	0	0
Norway	1997	1997	NOR	385	666	35	36.9	5.92843	0	0	0.719246	4.264	0	0	0	1.47267	10.6646	0	0	0	0	0
Nepal	1959	1959	NPL	790	667	37.2		4.46635	1	-1	0.106233	0.474474	0	0	0	0.700158	6.70868	0	1	0	0	1
Nepal	1991	1991	NPL	790	668	39.5		1.00328	0	0	0.28181	0.282734	0	0	0	0.905351	6.58031	0	1	0	0	0
Nepal	1994	1994	NPL	790	669	34.5	39.5	4.66857	0	0	0.463825	2.1654	0	0	0	1.02245	6.6736	0	1	0	0	0
Nepal	1999	1999	NPL	790	670	37.5	34.5	-4.79022	0	0	0.588515	-2.81911	0	0	0	0.875469	6.67427	0	1	0	0	0
New Zealand	1946	1946	NZL	920	671	51.3	47.6	3.3632	0	0	0.400406	1.34664	0	0	0	0.690649	9.20216	0	0	0	0	1
New Zealand	1949	1949	NZL	920	672	47.2	51.3	8.53734	0	0	0.566982	4.84052	0	0	0	0.670896	9.2511	0	0	0	0	1
New Zealand	1951	1951	NZL	920	673	53.9	51.9	-3.52369	0	0	0.273658	-0.964286	0	0	0	0.632521	9.33274	0	0	0	0	1
New Zealand	1954	1954	NZL	920	674	44.3	53.9	9.11309	0	0	0.240347	2.1903	0	0	0	0.677643	9.39014	0	0	0	0	1
New Zealand	1957	1957	NZL	920	675	44.2	44.3	2.82888	0	0	0.244129	0.690612	0	0	0	0.688135	9.43329	0	0	0	0	1
New Zealand	1960	1960	NZL	920	676	43.4	48.3	14.4455	0	0	0.2448	3.53626	0	0	0	0.670896	9.56585	0	0	0	0	1
New Zealand	1963	1963	NZL	920	677	47.1	47.6	4.13377	0	0	0.251787	1.04083	0	0	0	0.677643	9.63003	0	0	0	0	1
New Zealand	1966	1966	NZL	920	678	43.6	47.1	4.32379	0	0	0.250967	1.08513	0	0	0	0.703098	9.74806	0	0	0	0	1
New Zealand	1969	1969	NZL	920	679	45.2	43.6	8.39361	0	0	0.259998	2.18232	0	0	0	0.688059	9.75003	0	0	0	0	1
New Zealand	1972	1972	NZL	920	680	41.5	45.2	3.23451	0	0	0.284161	0.919122	0	0	0	0.625591	9.78012	0	0	0	0	1
New Zealand	1975	1975	NZL	920	681	39.6	48.4	-4.70854	0	0	0.277316	-1.30575	0	0	0	0.625591	9.8158	0	0	0	0	1
New Zealand	1978	1978	NZL	920	682	39.8	47.6	-1.4417	0	0	0.313755	-0.452341	0	0	0	0.702731	9.75173	0	0	0	0	1
New Zealand	1981	1981	NZL	920	683	38.8	39.8	2.67354	0	0	0.34251	0.915714	0	0	0	0.734145	9.77953	0	0	0	0	1
New Zealand	1984	1984	NZL	920	684	35.9	38.8	4.33794	0	0	0.352215	1.52789	0	0	0	0.68509	9.85877	0	0	0	0	1
New Zealand	1987	1987	NZL	920	685	48	43	1.48682	0	0	0.382809	0.569168	0	0	0	0.662894	9.88491	0	0	0	0	1
New Zealand	1990	1990	NZL	920	686	35.1	48	-0.72972	0	0	0.416668	-0.304051	0	0	0	0.565314	9.89264	0	0	0	0	0
New Zealand	1993	1993	NZL	920	687	35	47.8	4.51749	0	0	0.459505	2.07581	0	0	0	0.771098	9.91232	0	0	0	0	0
New Zealand	1996	1996	NZL	920	688	33.8	35	1.74943	0	0	0.495993	0.867705	0	0	0	1.32489	9.9937	0	0	0	0	0
New Zealand	1999	1999	NZL	920	689	30.5	33.8	4.65188	0	0	0.521262	2.42485	0	0	0	1.2374	10.0653	0	0	0	0	0
Pakistan	1970	1970	PAK	770	690			9.8143		0	0.386841	3.79657	0	0	0	1.01237	6.87013	0	1	0	0	1
Pakistan	1977	1977	PAK	770	691	60.1	18.6	2.29646	0	0	0.323003	0.741763	0	0	0	0.457425	6.93424	0	1	0	0	1
Pakistan	1988	1988	PAK	770	692			5.07142	0	0	0.297771	1.51012	0	0	0	1.14422	7.31598	0	1	0	0	1
Pakistan	1990	1990	PAK	770	693	37.4	30.2	1.64212	0	0	0.294	0.482783	0	0	0	1.12168	7.34743	0	1	0	0	0
Pakistan	1993	1993	PAK	770	694	39.9	37.4	-0.38688	0	0	0.374934	-0.145055	0	0	0	1.1474	7.4009	0	1	0	0	0
Pakistan	1997	1997	PAK	770	695	21.8	37.9	2.07657	0	0	0.339338	0.704659	0	0	0	0.770108	7.46238	0	1	0	0	0
Panama	1948	1948	PAN	95	696	38.5	32.1	2.10813	0	1	0.217078	0.457628	1	2.10813	0	1.12823	8.02203	0	0	0	1	1
Panama	1952	1952	PAN	95	697	62.5	38.5	-8.41571	0	1	1.53595	-12.9261	1	-8.41571	0	0.647103	7.42336	0	0	0	1	1
Panama	1956	1956	PAN	95	698	68.5	62.5	5.48486	0	1	1.39853	7.67076	1	5.48486	0	0.576613	7.59871	0	0	0	1	1
Panama	1960	1960	PAN	95	699	35.6	68.5	-4.10392	0	1	1.68954	-6.93373	1	-4.10392	0	1.04732	7.50714	0	0	0	1	1
Panama	1964	1964	PAN	95	700	41	41.4	1.86022	0	1	1.86487	3.46906	1	1.86022	0	1.09861	7.83859	0	0	0	1	1
Panama	1968	1968	PAN	95	701	41.8	41	6.26303	0	1	1.84569	11.5596	1	6.26303	0	0.741937	8.0325	0	0	0	1	1
Panama	1984	1984	PAN	95	702			-6.91887	1	1	1.20684	-8.34998	1	-6.91887	1	0.850437	8.57392	0	0	0	1	1
Panama	1989	1989	PAN	95	703	39.5		-8.77583	-1	0	1.38614	-12.1646	1	-8.77583	0	0.530628	8.5592	0	0	0	1	1
Panama	1994	1994	PAN	95	704	29.9	55.1	0.26314	0	0	1.70926	0.449774	1	0.26314	0	1.7156	8.74723	0	0	0	1	0
Panama	1999	1999	PAN	95	705	37.8	33.3	4.11627	0	0	1.57668	6.49003	1	4.11627	0	1.55604	8.8185	0	0	0	1	0
Peru	1956	1956	PER	135	706	17.8		5.55117	0	0	0.341562	1.89607	1	5.55117	0	0.985817	8.08563	0	0	0	1	1
Peru	1962	1962	PER	135	707	33	45.5	4.98236	-1	0	0.415369	2.06952	1	4.98236	0	1.22378	8.19841	0	0	0	1	1
Peru	1963	1963	PER	135	708	39.1	32.2	6.92888	0	0	0.41341	2.86447	1	6.92888	0	1.09192	8.2654	0	0	0	1	1
Peru	1980	1980	PER	135	709	27.2		1.75075	0	0	0.295081	0.516614	1	1.75075	0	1.23837	8.54516	0	0	0	1	1
Peru	1985	1985	PER	135	710	7.3	44.9	1.10672	0	0	0.263454	0.29157	1	1.10672	0	1.01523	8.43814	0	0	0	1	1
Peru	1990	1990	PER	135	711	22.5	53.1	-16.3414	0	0	0.244964	-4.00306	1	-16.3414	0	1.38379	8.31331	0	0	0	1	0
Peru	1995	1995	PER	135	712	64.3	29.1	10.8592	0	0	0.319268	3.46699	1	10.8592	1	0.768779	8.36023	0	0	0	1	0
Peru	2000	2000	PER	135	713	49.9	64.3	-0.39215	0	0	0.360381	-0.141324	1	-0.39215	1	0.885225	8.45605	0	0	0	1	0
Philippines	1946	1946	PHL	840	714	45.7			0	1	0.158515		1		1	0.693147		0	1	0	0	1
Philippines	1949	1949	PHL	840	715	50.9	53.9	3.22301	0	1	0.190617	0.614361	1	3.22301	1	0.887891	7.25782	0	1	0	0	1
Philippines	1953	1953	PHL	840	716	31.1	50.9	5.22956	-1	1	0.573979	3.00166	1	5.22956	1	0.559616	7.0622	0	1	0	0	1
Philippines	1957	1957	PHL	840	717	41.3	68.9	-1.9689	-1	1	0.542571	-1.06827	1	-1.9689	1	1.21194	7.2034	0	1	0	0	1
Philippines	1961	1961	PHL	840	718	45	41.3	2.82549	-1	1	0.396609	1.12062	1	2.82549	1	0.683097	7.31849	0	1	0	0	1
Philippines	1965	1965	PHL	840	719	42.9	55	2.39152	0	1	0.45866	1.09689	1	2.39152	1	0.783902	7.40828	0	1	0	0	1
Philippines	1969	1969	PHL	840	720	62.2	51.9	1.53347	0	1	0.408198	0.625959	1	1.53347	1	0.635317	7.46394	0	1	0	0	1
Philippines	1986	1986	PHL	840	721	53.6		-10.798	0	1	0.4461	-4.81699	1	-10.798	1	0.693147	7.61677	0	1	0	0	1
Philippines	1992	1992	PHL	840	722	23.6	53.6	-2.8381	0	0	0.652687	-1.85239	1	-2.8381	0	1.76473	7.72666	0	1	0	0	0
Philippines	1998	1998	PHL	840	723	15.9	23.6	5.34718	0	0	1.04872	5.60767	1	5.34718	0	1.47018	7.84799	0	1	0	0	0
Papua New Guinea	1977	1977	PNG	910	724	35	24	-7.43167	0	0	0.906559	-6.73725	0	0	0	1.43983	7.7184	0	1	0	0	1
Papua New Guinea	1982	1982	PNG	910	725	15	10	-4.27864	0	0	1.14715	-4.90824	0	0	0	0.989541	7.54206	0	1	0	0	1
Papua New Guinea	1987	1987	PNG	910	726	10.9		4.2045	0	0	1.07396	4.51547	0	0	0	1.78339	7.57041	0	1	0	0	1
Papua New Guinea	1992	1992	PNG	910	727	9.3	14.9	4.31726	0	0	1.01725	4.39174	0	0	0	1.78171	7.53472	0	1	0	0	0
Papua New Guinea	1997	1997	PNG	910	728	6.5	2.9	4.63962	0	0	0.934865	4.33742	0	0	0	1.61542	7.83126	0	1	0	0	0
Poland	1990	1990	POL	290	729	9.2		-12.3744	0	0	0.274133	-3.39223	1	-12.3744	0	1.34574	8.93951	0	0	1	0	0
Poland	1995	1995	POL	290	730	33.1	40	6.13544	0	0	0.416564	2.5558	1	6.13544	1	1.38379	9.08091	0	0	1	0	0
Poland	2000	2000	POL	290	731	53.9	35.1	4.18459	0	0	0.627416	2.62548	1	4.18459	1	1.05082	9.33	0	0	1	0	0
Portugal	1976	1976	PRT	235	732	61.6		-12.1519	0	0	0.251712	-3.05878	1	-12.1519	0	0.837247	9.10866	0	0	0	0	1
Portugal	1980	1980	PRT	235	733	56.4	61.6	4.91667	0	0	0.287835	1.41519	1	4.91667	1	0.732368	9.32198	0	0	0	0	1
Portugal	1983	1983	PRT	235	734	28	46	2.14485	0	0	0.284259	0.609694	0	0	0	1.2263	9.35989	0	0	0	0	1
Portugal	1985	1985	PRT	235	735	21.3	37.1	1.74366	0	0	0.330476	0.576238	0	0	0	1.4495	9.3051	0	0	0	0	1
Portugal	1987	1987	PRT	235	736	51.3	30.6	7.66408	0	0	0.375125	2.87499	0	0	0	0.863396	9.44116	0	0	0	0	1
Portugal	1991	1991	PRT	235	737	51.6	51.3	2.94663	0	0	0.434609	1.28063	0	0	0	0.806476	9.65895	0	0	0	0	0
Portugal	1995	1995	PRT	235	738	34.8	51.6	1.5269	0	0	0.499884	0.763273	0	0	0	0.936434	9.7014	0	0	0	0	0
Portugal	1999	1999	PRT	235	739	45	44.6	3.7801	0	0	0.576267	2.17835	0	0	0	0.963174	9.86411	0	0	0	0	0
Paraguay	1968	1968	PRY	150	740	71.6		5.59212	0	1	0.378798	2.11828	1	5.59212	1	0.57731	7.56247	0	0	0	1	1
Paraguay	1993	1993	PRY	150	741	41.6		-2.39761	0	0	0.981013	-2.35209	1	-2.39761	0	1.06878	8.16196	0	0	0	1	0
Paraguay	1998	1998	PRY	150	742	55.3	41.6	1.17487	0	0	1.33985	1.57415	1	1.17487	0	0.696023	8.15775	0	0	0	1	0
Romania	1990	1990	ROM	360	743	66.3		-8.24472	-1	0	0.296534	-2.44484	0	0	0	0.783225	8.80174	0	0	1	0	0
Romania	1992	1992	ROM	360	744	10.2	66.3	-8.02669	-1	0	0.264463	-2.12276	0	0	0	1.56444	8.51823	0	0	1	0	0
Romania	1996	1996	ROM	360	745	21.5	27.7	3.96215	0	0	0.339518	1.34522	0	0	0	1.45925	8.67311	0	0	1	0	0
Romania	2000	2000	ROM	360	746	5	30.2	3.85488	0	0	0.526915	2.03119	0	0	0	1.2613	8.67104	0	0	1	0	0
Russia	1996	1996	RUS	365	747	35.8	58.6	-3.79149	1	0	0.42262	-1.60236	1	-3.79149	1	1.32972	8.9562	0	0	1	0	0
Russia	2000	2000	RUS	365	748	53.4	35.8	4.19273	0	0	0.415045	1.74017	1	4.19273	0	0.970779	8.95078	0	0	1	0	0
Sudan	1958	1958	SDN	625	749	36.4	22.7	-4.02232	0	0	0.387344	-1.55802	0	0	0	1.30019	7.16776	0	0	0	0	1
Sudan	1965	1965	SDN	625	750			-3.63816	0	0	0.455922	-1.65872	0	0	0	1.04861	7.17604	0	0	0	0	1
Sudan	1967	1967	SDN	625	751	41.6	47.5	-3.81531	0	0	0.379839	-1.4492	0	0	0	1.2112	7.1787	0	0	0	0	1
Sudan	1968	1968	SDN	625	752	18.1	41.6	-5.68849	0	0	0.379569	-2.15917	0	0	0	1.3068	7.12013	0	0	0	0	1
Sudan	1986	1986	SDN	625	753			-2.79474	0	0	0.126303	-0.352984	0	0	0	1.40364	7.02272	0	0	0	0	1
Senegal	1988	1988	SEN	433	754	73.2		0.85514	0	0	0.709061	0.606346	1	0.85514	1	0.506739	7.10488	1	0	0	0	1
Senegal	1993	1993	SEN	433	755	58.4	73.2	-1.11787	0	0	0.676013	-0.755695	1	-1.11787	1	0.808839	7.05659	1	0	0	0	0
Senegal	2000	2000	SEN	433	756	41.3	58.4	4.06104	0	0	0.709525	2.88141	1	4.06104	1	0.664722	7.14489	1	0	0	0	0
Singapore	1972	1972	SGP	830	757	70.4		9.2691	0	0	1.33924	12.4136	0	0	0	0	9.08045	0	1	0	0	1
Singapore	1976	1976	SGP	830	758	74.1	70.4	5.5094	0	0	1.42993	7.87806	0	0	0	0	9.31705	0	1	0	0	1
Singapore	1984	1984	SGP	830	759	64.8		5.65887	0	0	1.77028	10.0178	0	0	0	0.05095	9.83908	0	1	0	0	1
Singapore	1988	1988	SGP	830	760	63.2	64.8	5.91438	0	0	2.44399	14.4547	0	0	0	0.024693	9.92503	0	1	0	0	1
Singapore	1991	1991	SGP	830	761	61	63.2	3.66996	0	0	2.51113	9.21575	0	0	0	0.099601	10.1028	0	1	0	0	0
Singapore	1997	1997	SGP	830	762	65	61	5.18514	0	0	3.21251	16.6573	0	0	0	0.048476	10.3966	0	1	0	0	0
Solomon Islands	1980	1980	SLB	940	763	18		-10.4545	0	0	1.0115	-10.5747	0	0	0	1.14422	7.46501	0	1	0	0	1
Solomon Islands	1984	1984	SLB	940	764	23.4	15.7	2.32019	0	0	1.2055	2.79699	0	0	0	1.29746	7.3878	0	1	0	0	1
Solomon Islands	1989	1989	SLB	940	765	18.1	21.4	-0.19962	0	0	1.31812	-0.263123	0	0	0	1.29746	7.3704	0	1	0	0	1
Solomon Islands	1993	1993	SLB	940	766	23		4.04646	0	0	1.11637	4.51736	0	0	0	1.4061	7.47218	0	1	0	0	0
Solomon Islands	1997	1997	SLB	940	767	25	23	-6.21403	0	0	1.3142	-8.16648	0	0	0	1.44692	7.39151	0	1	0	0	0
Sierra Leone	1962	1962	SLE	451	768	34.7	45.7	0.3246	0	0	2.01163	0.652976	0	0	0	1.12177	6.07167	1	0	0	0	1
Sierra Leone	1967	1967	SLE	451	769	37.1	34.7	5.00297	0	0	1.2444	6.22568	0	0	0	0.858662	6.46089	1	0	0	0	1
Sierra Leone	1996	1996	SLE	451	770	5.3		-6.65804	0	0	0.35304	-2.35056	1	-6.65804	0	1.53471	6.68486	1	0	0	0	0
El Salvador	1950	1950	SLV	92	771	56.4		-10.6715	0	1	1.60925	-17.1731	1	-10.6715	1	0.676896	7.65545	0	0	0	1	1
El Salvador	1967	1967	SLV	92	772	54.4		4.40068	0	1	0.384529	1.69219	1	4.40068	0	0.987401	8.30847	0	0	0	1	1
El Salvador	1972	1972	SLV	92	773			1.49626	0	1	0.347546	0.52002	1	1.49626	0	0.965047	8.33047	0	0	0	1	1
El Salvador	1977	1977	SLV	92	774			3.5283	0	1	0.371677	1.31139	1	3.5283	0	0.580074	8.47813	0	0	0	1	1
El Salvador	1982	1982	SLV	92	775	40.2		-6.15388	1	1	0.369499	-2.27385	0	0	0	1.15166	8.31079	0	0	0	1	1
El Salvador	1984	1984	SLV	92	776	3.5	7.7	-1.94657	-1	1	0.365536	-0.711541	1	-1.94657	0	1.15057	8.24801	0	0	0	1	1
El Salvador	1989	1989	SLV	92	777	36.5	43.4	0.79585	0	1	0.302331	0.24061	1	0.79585	0	0.854415	8.2796	0	0	0	1	1
El Salvador	1994	1994	SLV	92	778	49	53.8	5.9027	0	0	0.402841	2.37785	1	5.9027	0	1.09861	8.40806	0	0	0	1	0
El Salvador	1999	1999	SLV	92	779	52	49	2.58331	0	0	0.563165	1.45483	1	2.58331	0	1.00796	8.55413	0	0	0	1	0
Somalia	1964	1964	SOM	520	780	56.1	67.4	1.71872		0	0.270937	0.465665	0	0	0	0.999039	7.5438	1	0	0	0	1
Somalia	1969	1969	SOM	520	781	59.3	56.1	-0.49044	0	0	0.202641	-0.099383	0	0	0	0.920283	7.45795	1	0	0	0	1
Suriname	1977	1977	SUR	115	782	45.4	50.3	6.3269	0	0	0.930389	5.88648	0	0	0	0.676845	9.2724	0	0	0	1	1
Suriname	1991	1991	SUR	115	783	21.7	9.3	-24.224	0	0	0.415738	-10.0708	0	0	0	0.837247	9.00336	0	0	0	1	0
Suriname	1996	1996	SUR	115	784	41.8	54.3	0.20555	0	0	1.56209	0.321088	0	0	0	1.09192	8.81532	0	0	0	1	0
Suriname	2000	2000	SUR	115	785	15	26.2	-25.4841	0	0	1.11486	-28.4112	0	0	0	0.824175	8.84761	0	0	0	1	0
Slovakia	1994	1994	SVK	317	786	35	37.3	2.49261	0	0	0.93004	2.31823	0	0	0	1.48467	9.18278	0	0	1	0	0
Slovakia	1998	1998	SVK	317	787	27	35	4.40876	-1	0	1.10272	4.86164	0	0	0	1.56025	9.40638	0	0	1	0	0
Slovenia	1992	1992	SVN	349	788	23.5	14.5	-6.02669	0	0	0.844763	-5.09113	0	0	0	1.88707	9.47559	0	0	1	0	0
Slovenia	1996	1996	SVN	349	789	27	23.5	3.32752	0	0	0.906104	3.01508	0	0	0	1.71019	9.68131	0	0	1	0	0
Slovenia	2000	2000	SVN	349	790	8.8	19.4	4.13504	0	0	1.05015	4.34241	0	0	0	1.51513	9.86174	0	0	1	0	0
Sweden	1948	1948	SWE	380	791	46.1	46.6	1.89367	0	0	0.468538	0.887256	0	0	0	1.11851	9.07278	0	0	0	0	1
Sweden	1952	1952	SWE	380	792	46	46.1	2.45061	0	0	0.197969	0.485145	0	0	0	1.1278	9.35766	0	0	0	0	1
Sweden	1956	1956	SWE	380	793	44.6	46	2.38965	0	0	0.232523	0.555649	0	0	0	1.15803	9.47023	0	0	0	0	1
Sweden	1958	1958	SWE	380	794	46.2	44.6	1.23796	0	0	0.245902	0.304417	0	0	0	1.15057	9.48254	0	0	0	0	1
Sweden	1960	1960	SWE	380	795	47.8	46.2	2.83449	0	0	0.270087	0.765559	0	0	0	1.13783	9.5689	0	0	0	0	1
Sweden	1964	1964	SWE	380	796	47.3	47.8	5.5563	0	0	0.283909	1.57748	0	0	0	1.17866	9.75391	0	0	0	0	1
Sweden	1968	1968	SWE	380	797	50.1	47.3	3.02559	0	0	0.322414	0.975493	0	0	0	1.05779	9.83739	0	0	0	0	1
Sweden	1970	1970	SWE	380	798	45.3	50.1	0.7231	0	0	0.373901	0.270368	0	0	0	1.19695	9.88068	0	0	0	0	1
Sweden	1973	1973	SWE	380	799	43.6	45.3	3.17761	0	0	0.406665	1.29222	0	0	0	1.20932	9.92907	0	0	0	0	1
Sweden	1976	1976	SWE	380	800	42.7	43.6	1.42753	0	0	0.406595	0.580427	0	0	0	1.23547	9.99701	0	0	0	0	1
Sweden	1979	1979	SWE	380	801	10.6	11.1	3.15524	0	0	0.432749	1.36543	0	0	0	1.2499	10.0007	0	0	0	0	1
Sweden	1982	1982	SWE	380	802	23.6	20.3	0.9265	0	0	0.446743	0.413907	0	0	0	1.14065	10.0064	0	0	0	0	1
Sweden	1985	1985	SWE	380	803	44.7	45.6	2.62821	0	0	0.490833	1.29001	0	0	0	1.22083	10.0684	0	0	0	0	1
Sweden	1988	1988	SWE	380	804	43.2	44.7	2.30422	0	0	0.500031	1.15218	0	0	0	1.29885	10.1635	0	0	0	0	1
Sweden	1991	1991	SWE	380	805	37.7	43.2	-1.82842	0	0	0.510146	-0.932761	0	0	0	1.43508	10.1562	0	0	0	0	0
Sweden	1994	1994	SWE	380	806	22.4	21.9	2.74291	0	0	0.612658	1.68047	0	0	0	1.25562	10.1245	0	0	0	0	0
Sweden	1998	1998	SWE	380	807	36.4	45.3	3.91871	0	0	0.776805	3.04407	0	0	0	1.45716	10.2256	0	0	0	0	0
Syria	1947	1947	SYR	652	808	17.6		-15.2243	0	0	0.129859	-1.97702	0	0	0	0.990971	7.77904	0	1	0	0	1
Syria	1949	1949	SYR	652	809	55.3	24.3		0	0			0		0	0.919836		0	1	0	0	1
Syria	1954	1954	SYR	652	810	21.1	55.3	11.9591	0	0	0.138452	1.65576	0	0	0	1.23677	8.4727	0	1	0	0	1
Syria	1961	1961	SYR	652	811	2.3	1.4	-1.46241	0	0	0.747824	-1.09362	1	-1.46241	1	1.17874	7.32597	0	1	0	0	1
Chad	1996	1996	TCD	483	812	43.8		-9.41712	0	0	0.474714	-4.47044	1	-9.41712	1	1.47041	6.57762	1	0	0	0	0
Togo	1998	1998	TGO	461	813	52.1		-1.15656	0	0	0.661277	-0.764807	1	-1.15656	1	0.919813	6.73419	1	0	0	0	0
Thailand	1957	1957	THA	800	814	53.7		1.25987	0	0	0.488593	0.615563	0	0	0	1.08388	6.62119	0	1	0	0	1
Thailand	1969	1969	THA	800	815	34.7		4.7888	1	1	0.601586	2.88087	0	0	0	1.22159	7.23543	0	1	0	0	1
Thailand	1975	1975	THA	800	816			2.92519	0	0	0.542366	1.58652	0	0	0	2.02287	7.49533	0	1	0	0	1
Thailand	1976	1976	THA	800	817	17.5	10.8	3.20372	0	0	0.499252	1.59946	0	0	0	1.40364	7.52686	0	1	0	0	1
Thailand	1979	1979	THA	800	818			10.3523	0	0	0.526169	5.44705	0	0	0	1.75325	7.77099	0	1	0	0	1
Thailand	1983	1983	THA	800	819			4.92366	0	0	0.511096	2.51646	0	0	0	1.69562	7.89593	0	1	0	0	1
Thailand	1986	1986	THA	800	820			3.11469	0	0	0.54834	1.70791	0	0	0	1.82132	8.03026	0	1	0	0	1
Thailand	1988	1988	THA	800	821			8.21783	0	0	0.796017	6.54153	0	0	0	2.04636	8.1645	0	1	0	0	1
Thailand	1992	1992	THA	800	822	19.3		7.53075	0	0	0.939812	7.07749	0	0	0	1.79259	8.4571	0	1	0	0	0
Thailand	1995	1995	THA	800	823	22.3	21	5.62477	0	0	1.17792	6.62553	0	0	0	1.86098	8.70788	0	1	0	0	0
Thailand	1996	1996	THA	800	824	9.9	22.8	3.39976	0	0	1.09522	3.72348	0	0	0	1.46326	8.74131	0	1	0	0	0
Tajikistan	1994	1994	TJK	702	825	59.5		-24.2063	0	0	1.06822	-25.8577	1	-24.2063	1	0.738565	7.21749	0	1	0	0	0
Trinidad and Tobago	1966	1966	TTO	52	826	52.4	57	1.41603	0	0	0.478436	0.67748	0	0	0	0.587787	9.16288	0	0	0	1	1
Trinidad and Tobago	1976	1976	TTO	52	827	54.2	52.4	8.96216	0	0	0.557272	4.99436	0	0	0	0.644944	9.61119	0	0	0	1	1
Trinidad and Tobago	1981	1981	TTO	52	828	52.9	54.2	-2.45169	0	0	0.526736	-1.29139	0	0	0	0.554999	9.83938	0	0	0	1	1
Trinidad and Tobago	1986	1986	TTO	52	829	32	52.9	-11.8174	0	0	0.84781	-10.0189	0	0	0	0.165794	9.40826	0	0	0	1	1
Trinidad and Tobago	1991	1991	TTO	52	830	24.6	66.3	2.40097	0	0	0.823753	1.97781	0	0	0	0.747043	9.29577	0	0	0	1	0
Trinidad and Tobago	1995	1995	TTO	52	831	48.8	45.1	5.07124	0	0	0.755112	3.82935	0	0	0	0.800565	9.4048	0	0	0	1	0
Trinidad and Tobago	2000	2000	TTO	52	832	51.7	45.8	18.1429	0	0	0.931804	16.9056	0	0	0	0.693147	9.66871	0	0	0	1	0
Turkey	1946	1946	TUR	640	833	54		26.2031	0	0	0.111211	2.91407	0	0	0	0.300164	7.59142	0	0	1	0	1
Turkey	1950	1950	TUR	640	834	39.9	54	-7.23877	0	0	0.088819	-0.642943	0	0	0	0.325317	7.65141	0	0	1	0	1
Turkey	1954	1954	TUR	640	835	57.6	53.3	9.92043	0	0	0.111653	1.10765	0	0	0	0.171463	8.03084	0	0	1	0	1
Turkey	1957	1957	TUR	640	836	47.9	57.6	18.5688	0	0	0.056735	1.0535	0	0	0	0.567187	8.11912	0	0	1	0	1
Turkey	1961	1961	TUR	640	837	36.7	41.1	1.25499	0	0	0.110469	0.138637	0	0	0	1.18479	8.07829	0	0	1	0	1
Turkey	1965	1965	TUR	640	838	28.7	36.7	0.41808	0	0	0.099049	0.04141	0	0	0	0.964029	8.18302	0	0	1	0	1
Turkey	1969	1969	TUR	640	839	46.5	52.9	2.51438	0	0	0.083849	0.210828	0	0	0	0.850365	8.35029	0	0	1	0	1
Turkey	1973	1973	TUR	640	840	5.3	6.6	0.40432	0	0	0.121918	0.049294	0	0	0	1.19997	8.46836	0	0	1	0	1
Turkey	1977	1977	TUR	640	841	36.9	29.8	8.0957	0	0	0.1285	1.04029	0	0	0	0.904218	8.58257	0	0	1	0	1
Turkey	1983	1983	TUR	640	842	23.3		3.34593	0	0	0.179537	0.600718	0	0	0	0.922881	8.60893	0	0	1	0	1
Turkey	1987	1987	TUR	640	843	36.3	45.1	3.74022	0	0	0.203338	0.760529	0	0	0	0.71784	8.72926	0	0	1	0	1
Turkey	1991	1991	TUR	640	844	24	36.3	-0.06756	0	0	0.22215	-0.015008	0	0	0	1.27257	8.80141	0	0	1	0	0
Turkey	1995	1995	TUR	640	845	19.2	27	4.5878	0	0	0.291706	1.33829	0	0	0	1.48388	8.86654	0	0	1	0	0
Turkey	1999	1999	TUR	640	846	22.2	14.6	0.82801	0	0	0.379457	0.314194	0	0	0	1.58353	9.0022	0	0	1	0	0
Taiwan	1996	1996	TWN	713	847	54		5.4628	0	0	0.928706	5.07333	1	5.4628	1	0.996949	9.82599	0	1	0	0	0
Taiwan	2000	2000	TWN	713	848	23.1	54	4.94259	0	0	1.01545	5.01894	1	4.94259	0	1.06922	9.99285	0	1	0	0	0
Tanzania	1995	1995	TZA	510	849	61.8		-1.7787	0	0	0.316526	-0.563005	1	-1.7787	0	0.765924	6.50981	1	0	0	0	0
Tanzania	2000	2000	TZA	510	850	71.8	61.8	2.06576	0	0	0.35445	0.732208	1	2.06576	1	0.599748	6.58567	1	0	0	0	0
Uganda	1980	1980	UGA	500	851			-4.4784	0	0	0.275926	-1.23571	0	0	0	0.66974	6.28378	1	0	0	0	1
Uganda	1996	1996	UGA	500	852	74.2		-2.54041	0	0	0.333897	-0.848235	1	-2.54041	1	0.498937	6.56045	1	0	0	0	0
Ukraine	1994	1994	UKR	369	853	38.4	61.6	-18.4117	1	0	0.674121	-12.4117	1	-18.4117	1	1.29746	8.36227	0	0	1	0	0
Ukraine	1999	1999	UKR	369	854	38	31.8	2.51136	0	0	0.861125	2.1626	1	2.51136	1	1.53687	8.1624	0	0	1	0	0
Uruguay	1946	1946	URY	165	855	47.8	57.2	8.475	0	0	0.14102	1.19515	1	8.475	0	1.06126	8.6403	0	0	0	1	1
Uruguay	1950	1950	URY	165	856	52.6	47.8	3.4414	0	0	0.26772	0.921332	1	3.4414	0	0.966984	8.42046	0	0	0	1	1
Uruguay	1954	1954	URY	165	857			9.75573	0	0	0.239044	2.33205	1	9.75573	1	0.951658	8.61389	0	0	0	1	1
Uruguay	1958	1958	URY	165	858			-9.81487	0	0	0.15875	-1.55811	1	-9.81487	1	0.932164	8.50714	0	0	0	1	1
Uruguay	1962	1962	URY	165	859			-2.42303	0	0	0.197785	-0.479239	1	-2.42303	0	0.875469	8.50069	0	0	0	1	1
Uruguay	1966	1966	URY	165	860	40.3	46.5	3.07389	0	1	0.170902	0.525334	1	3.07389	0	0.891998	8.46805	0	0	0	1	1
Uruguay	1971	1971	URY	165	861	41	49.3	0.92305	1	1	0.21406	0.197588	1	0.92305	1	1.0116	8.5413	0	0	0	1	1
Uruguay	1984	1984	URY	165	862	41.2		-3.77912	0	0	0.276711	-1.04572	1	-3.77912	0	1.08401	8.55716	0	0	0	1	1
Uruguay	1989	1989	URY	165	863	30.3	41.2	-0.60288	0	0	0.318107	-0.19178	1	-0.60288	0	1.21788	8.73013	0	0	0	1	1
Uruguay	1994	1994	URY	165	864	31.2	38.9	7.89455	0	0	0.42968	3.39213	1	7.89455	0	1.20597	9.00118	0	0	0	1	0
Uruguay	1999	1999	URY	165	865	22.3	32.2	-3.17375	0	0	0.470339	-1.49274	1	-3.17375	0	1.22671	9.08691	0	0	0	1	0
United States of America	1948	1948	USA	2	866	49.6	53.4	2.00955	-1	0	0.075301	0.151321	1	2.00955	1	0.797507	9.43783	0	0	0	0	1
United States of America	1952	1952	USA	2	867	44.4	49.6	3.47981	0	0	0.059681	0.207678	1	3.47981	0	0.691646	9.59108	0	0	0	0	1
United States of America	1956	1956	USA	2	868	57.4	55.1	0.02376	0	0	0.069037	0.00164	1	0.02376	1	0.683097	9.62497	0	0	0	0	1
United States of America	1960	1960	USA	2	869	49.5	57.4	0.62474	0	0	0.076108	0.047548	1	0.62474	0	0.708036	9.64132	0	0	0	0	1
United States of America	1964	1964	USA	2	870	61.1	49.7	4.23846	0	0	0.078903	0.334427	1	4.23846	1	0.652325	9.76422	0	0	0	0	1
United States of America	1968	1968	USA	2	871	42.7	61.1	4.08623	0	0	0.089906	0.367376	1	4.08623	0	0.943906	9.91885	0	0	0	0	1
United States of America	1972	1972	USA	2	872	60.7	43.4	4.28271	0	0	0.102974	0.441008	1	4.28271	1	0.672944	9.98731	0	0	0	0	1
United States of America	1976	1976	USA	2	873	48	60.7	4.68679	0	0	0.110406	0.51745	1	4.68679	1	0.732368	10.0496	0	0	0	0	1
United States of America	1980	1980	USA	2	874	41	50.1	-1.99657	0	0	0.122576	-0.244732	1	-1.99657	1	0.845868	10.126	0	0	0	0	1
United States of America	1984	1984	USA	2	875	58.8	50.7	6.62418	-1	0	0.129218	0.855963	1	6.62418	1	0.672944	10.2184	0	0	0	0	1
United States of America	1988	1988	USA	2	876	53.4	58.8	3.00495	0	0	0.149549	0.449387	1	3.00495	0	0.688135	10.3257	0	0	0	0	1
United States of America	1992	1992	USA	2	877	37.4	53.4	2.13247	0	0	0.173268	0.369489	1	2.13247	1	1.00796	10.3593	0	0	0	0	0
United States of America	1996	1996	USA	2	878	49.2	43	2.79128	0	0	0.20866	0.582429	1	2.79128	1	0.879627	10.4497	0	0	0	0	0
United States of America	2000	2000	USA	2	879	48.4	49.2	3.155	0	0	0.25264	0.797079	1	3.155	0	0.765468	10.5877	0	0	0	0	0
Venezuela	1947	1947	VEN	101	880	74.3		15.9013	0	0	0.204696	3.25493	1	15.9013	0	0.506818	9.16405	0	0	0	1	1
Venezuela	1958	1958	VEN	101	881	34.6		-2.20305	1	0	0.545503	-1.20177	1	-2.20305	1	0.946688	8.91279	0	0	0	1	1
Venezuela	1963	1963	VEN	101	882	32.8	49.2	2.76225	0	0	0.512652	1.41607	1	2.76225	0	1.51732	8.93855	0	0	0	1	1
Venezuela	1968	1968	VEN	101	883	28.2	32.8	5.0186	0	0	0.498187	2.5002	1	5.0186	0	1.38128	9.05326	0	0	0	1	1
Venezuela	1973	1973	VEN	101	884	36.7	29.1	6.42734	0	0	0.518258	3.33102	1	6.42734	0	0.97456	9.19831	0	0	0	1	1
Venezuela	1978	1978	VEN	101	885	43.3	48.7	-2.01097	0	0	0.469521	-0.944193	1	-2.01097	0	0.896088	9.33003	0	0	0	1	1
Venezuela	1983	1983	VEN	101	886	33.5	46.6	-9.95849	0	0	0.367742	-3.66215	1	-9.95849	0	0.81093	9.02065	0	0	0	1	1
Venezuela	1988	1988	VEN	101	887	52.9	58.4	4.14103	0	0	0.441825	1.82961	1	4.14103	0	0.81093	9.09304	0	0	0	1	1
Venezuela	1993	1993	VEN	101	888	23.6	52.9	-1.88268	0	0	0.487374	-0.917569	1	-1.88268	0	1.39377	9.1058	0	0	0	1	0
Venezuela	1998	1998	VEN	101	889			-0.42167	0	0	0.602492	-0.254053	1	-0.42167	0	0.741937	9.12546	0	0	0	1	0
Venezuela	2000	2000	VEN	101	890	59.8	56.2	2.76508	0	0	0.596046	1.64812	1	2.76508	1	1.21788	9.06425	0	0	0	1	0
Vanuatu	1983	1983	VUT	935	891	55.1	62.3	22.4565	0	0	1.0423	23.4064	0	0	0	0.741937	8.6057	0	1	0	0	1
Vanuatu	1987	1987	VUT	935	892	47.3	55.1	-11.3863	0	0	0.966802	-11.0083	0	0	0	0.760806	8.48349	0	1	0	0	1
Vanuatu	1991	1991	VUT	935	893	22.6	47.3	7.44525	0	0	0.960464	7.1509	0	0	0	1.29473	8.54901	0	1	0	0	0
Vanuatu	1995	1995	VUT	935	894	27.4	30.6	2.38657	0	0	0.895098	2.13621	0	0	0	1.16938	8.6333	0	1	0	0	0
Vanuatu	1998	1998	VUT	935	895	20.1	27.4	-5.57877	0	0	0.926376	-5.16804	0	0	0	1.45044	8.62362	0	1	0	0	0
Samoa	1979	1979	SAM	990	896	24.3		5.02019	0	0	0.83688	4.2013	0	0	0	0.692697	8.39612	0	1	0	0	1
Samoa	1982	1982	SAM	990	897	18.4	24.3	-10.0946	0	0	0.838919	-8.46855	0	0	0	0.692697	8.32727	0	1	0	0	1
Samoa	1985	1985	SAM	990	898	34.5	29.3	2.31369	0	0	0.832267	1.92561	0	0	0	0.570188	8.33597	0	1	0	0	1
Samoa	1988	1988	SAM	990	899	35.9	34.5	0.81691	0	0	0.944654	0.771697	0	0	0	0.692697	8.43444	0	1	0	0	1
Samoa	1991	1991	SAM	990	900	49.6	35.9	-5.07003	0	0	0.833212	-4.22441	0	0	0	0.813762	8.4259	0	1	0	0	0
Samoa	1996	1996	SAM	990	901	43.5	49.6	4.49059	0	0	0.827776	3.7172	0	0	0	1.0186	8.42908	0	1	0	0	0
Yemen	1993	1993	YYY	679	902	28.7		4.2366	0	0	0.378906	1.60527	0	0	0	1.31397	7.28594	0	0	0	0	0
Yugoslavia	1992	1992	FFF	345	903	48.9		-14.5784	0	0	0.2643	-3.85307	0	0	0	0.976799	8.81983	0	0	1	0	0
Yugoslavia	1996	1996	FFF	345	904	45	33.3	9.48987	0	0	0.4601	4.36629	0	0	0	1.27603	8.61049	0	0	1	0	0
Yugoslavia	2000	2000	FFF	345	905	38.2	45.3	4.32965	-1	0	0.2584	1.11878	1	4.32965	1	0.872673	8.77183	0	0	1	0	0
South Africa	1948	1948	ZAF	560	906	49.2	49.7	-0.171	0	0	0.790895	-0.135243	0	0	0	0.889758	8.08332	1	0	0	0	1
South Africa	1953	1953	ZAF	560	907	49.5	37.7	-3.10119	0	0	0.521835	-1.61831	0	0	0	0.697926	8.07917	1	0	0	0	1
South Africa	1958	1958	ZAF	560	908	55.6	49.5	2.42447	0	0	0.573573	1.39061	0	0	0	0.595358	8.24117	1	0	0	0	1
South Africa	1961	1961	ZAF	560	909	46.1	55.6	3.72639	0	0	0.542974	2.02333	0	0	0	0.594613	8.31501	1	0	0	0	1
South Africa	1966	1966	ZAF	560	910	58.3	46.1	1.8966	0	0	0.60812	1.15336	0	0	0	0.459865	8.43229	1	0	0	0	1
South Africa	1970	1970	ZAF	560	911	54.9	58.3	1.88405	0	0	0.565248	1.06496	0	0	0	0.537878	8.5246	1	0	0	0	1
South Africa	1974	1974	ZAF	560	912	56.1	54.9	1.82611	0	0	0.532754	0.972868	0	0	0	0.579206	8.59591	1	0	0	0	1
South Africa	1977	1977	ZAF	560	913	65.3	56.1	0.74727	0	0	0.454317	0.339497	0	0	0	0.382128	8.61645	1	0	0	0	1
South Africa	1981	1981	ZAF	560	914	58.6	65.3	7.51229	0	0	0.429121	3.22368	0	0	0	0.419276	8.70235	1	0	0	0	1
South Africa	1984	1984	ZAF	560	915			2.54585	0	0	0.338665	0.862191	0	0	0		8.684	1	0	0	0	1
South Africa	1987	1987	ZAF	560	916	52.7	58.6	-4.62473	0	0	0.365833	-1.69188	0	0	0	0.545134	8.56879	1	0	0	0	1
South Africa	1989	1989	ZAF	560	917	48.2	52.7	1.23624	0	0	0.39312	0.485991	0	0	0	0.878581	8.61175	1	0	0	0	1
South Africa	1994	1994	ZAF	560	918	20.4	48.2	0.30922	0	0	0.432634	0.133779	0	0	0	0.795234	8.54164	1	0	0	0	0
South Africa	1999	1999	ZAF	560	919	66.3	62.6	0.15828	0	0	0.532081	0.084218	0	0	0	0.765468	8.62642	1	0	0	0	0
Democratic Republic of Congo	1960	1960	ZAR	490	920			-5.211	-1	0	0.067255	-0.350464	0	0	0	2.0811	6.54439	1	0	0	0	1
Zambia	1996	1996	ZMB	551	921	72.6		-1.92128	0	0	0.170148	-0.326902	1	-1.92128	1	0.593327	6.85217	1	0	0	0	0
Zimbabwe	1980	1980	ZWE	552	922			5.07978	0	0	0.193659	0.983747	0	0	0	0.901896	6.05172	1	0	0	0	1
South Vietnam	1967	1967	RVN	817	923	34.8		-0.558	0	1	0.903983	-0.504422	1	-0.558	1	1.68492	5.56773	0	1	0	0	1
South Vietnam	1961	1961	RVN	817	924			-2.755	1	1			1	-2.755	1		6.79132	0	1	0	0	1
South Vietnam	1971	1971	RVN	817	925			-0.147	1	1	0.765627	-0.112547	1	-0.147	1		5.35878	0	1	0	0	1
Bolivia	1964	1964	BOL	145	926			5.51404	1	0	0.499521	2.75438	1	5.51404	1		7.93823	0	0	0	1	1
Chile	1988	1988	CHL	155	927	44		5.87919	-1	0	0.436466	2.56607	1	5.87919	1	0.67885	8.5052	0	0	0	1	1
Serbia	1992	1992	SRB	345	928	53.2		-27.7655	-1	0	0.467867	-12.9906	1	-27.7655	1	0.946478	8.82491	0	0	1	0	0
Serbia	1997	1997	SRB	345	929	43.7	53.2	7.43838	0	0	0.436032	3.24337	1	7.43838	0	1.13976	8.66132	0	0	1	0	0
Argentina	1973	1974	ARG	160	930	61.8	49.5	1.4144	0	0	0.135401	0.191511	1	1.4144	0	0.783947	8.9789	0	0	0	1	1
Denmark	1953	1954	DNK	390	931	23.1	22.1	5.8291	0	0	0.221595	1.2917	0	0	0	1.34487	9.13471	0	0	0	0	1
Fiji	1977	1978	FJI	950	932	52.2	46	4.0956	0	0	0.825932	3.38269	0	0	0	0.623154	8.07994	0	1	0	0	1
France	1946	1947	FRA	220	933	26.3	28.1	16	0	0	0.478961	7.66338	0	0	0	1.46229	8.58288	0	0	0	0	1
Greece	1989	1988	GRC	350	934	45.2	47.3	3.28633	0	0	0.356587	1.17186	0	0	0	0.843144	9.77082	0	0	0	0	1
Ireland	1982	1983	IRL	205	935	46.2	44.3	-1.71689	0	0	0.525401	-0.902056	0	0	0	0.93723	9.60346	0	0	0	0	1
Sri Lanka	1960	1961	LKA	780	936	37.6	29.5	3.74373	1	0	1.66391	6.22924	0	0	0	1.18161	6.40909	0	1	0	0	1
Thailand	1957	1958	THA	800	937			10.5296	0	0	0.47073	4.9566	0	0	0	1.29411	6.7213	0	1	0	0	1
Thailand	1992	1993	THA	800	938			7.22546	0	0	0.960708	6.94156	0	0	0	1.80993	8.52686	0	1	0	0	0
United Kingdom	1974	1975	GBR	200	939	39.3	37.2	-0.96223	0	0	0.298727	-0.287444	0	0	0	0.81272	9.64663	0	0	0	0	1
Yugoslavia	1992	1993	FFF	345	940	33.3	48.9	-14.578	0	0	0.2643	-3.85297	0	0	0	1.52751	8.60936	0	0	1	0	0
St Lucia	1987	1988	LCA	56	941	53.2	52.5	14.5989	0	0	1.19713	17.4768	0	0	0	0.689691	8.86474	0	0	0	1	1
